# Supplementary material for: Direct access to furan and cyclopropane derivatives via palladium-catalyzed C–H activation/alkene insertion/annulation
Source: Royal Society of Chemistry journal article supplement (doi:10.1039/d4cc01964d), 2024-01-01

# Direct Access to Furan and Cyclopropane Derivatives by Palladium-Catalyzed C-H Activation/Alkenes Insertion/Annulation

## Table of Contents

|                                                                           |        |
|---------------------------------------------------------------------------|--------|
| General methods and materials.....                                        | 2      |
| Screening of Reaction Conditions.....                                     | 3-4    |
| General Catalytic Procedure for the Synthesis of <b>3</b> .....           | 5      |
| Procedure Gram-scale for the Synthesis of <b>3a</b> .....                 | 6      |
| General Catalytic Procedure for the Synthesis of <b>4</b> .....           | 7      |
| General Catalytic Procedure for the Synthesis of <b>5</b> .....           | 8      |
| Mechanistic Study.....                                                    | 9-11   |
| X-Ray Crystallographic Data.....                                          | 12     |
| Characterization Data for the Products.....                               | 13-33  |
| References.....                                                           | 34     |
| Copies of <sup>1</sup> H and <sup>13</sup> C NMR Spectra of Products..... | 35-101 |

## General Methods and Materials

Pd(OAc)<sub>2</sub>, Pd(TFA)<sub>2</sub>, Pd(PPh<sub>3</sub>)<sub>4</sub>, Pd(acac)<sub>2</sub>, Pd(dba)<sub>2</sub>, [RhCp\*Cl<sub>2</sub>]<sub>2</sub>, [IrCp\*Cl<sub>2</sub>]<sub>2</sub>, [RuCl<sub>2</sub>(*p*-cymene)]<sub>2</sub>, Cp\*CoI<sub>2</sub>(CO), Cu(OAc)<sub>2</sub>, TFA, HOTf, and PivOH were purchased from Energy Chemical and used without further purification. Other chemicals were purchased from commercial suppliers, further dried and purified if necessary. The water used was re-distilled and ion-free. <sup>1</sup>H and <sup>13</sup>C NMR spectra were achieved on a Bruker AVANCE 400 MHz spectrometer (<sup>1</sup>H 400 MHz; <sup>13</sup>C 100 MHz) in CDCl<sub>3</sub>. Abbreviations for data quoted are *s*-singlet; *bvs*-broad singlet; *d*-doublet; *t*-triplet; *dd*-doublet of doublets; *m*-multiplet. High-resolution mass spectra were measured on a Waters Micromass GCT facility. Thin-layer chromatographies were done on pre-coated silica gel 60F254 plates (Merck). Silica gel 60H (200-300 mesh) manufactured by Qingdao Haiyang Chemical Group Co. (China) was used for general chromatography.

## Screening of Reaction Conditions<sup>a</sup>

O=C1CCCCC1 (**1a**) + O=CC=Cc1ccccc1 (**2a**)  $\xrightarrow[\text{solvent, 120 } ^\circ\text{C, air}]{\text{catalyst (5 mol\% Cu(OAc)}_2 \text{ (2.0 equiv) additive (1.0 equiv)}}$  O=C1C=CC=C1c2ccccc2 (**3a**)

| entry           | catalyst                                             | additive | solvent            | yield (%) <sup>b</sup> |
|-----------------|------------------------------------------------------|----------|--------------------|------------------------|
| 1               | Pd(OAc) <sub>2</sub>                                 | HOAc     | toluene            | 15                     |
| 2               | Pd(OAc) <sub>2</sub>                                 | PivOH    | toluene            | 64                     |
| 3               | Pd(OAc) <sub>2</sub>                                 | TFA      | toluene            | 77                     |
| 4               | Pd(OAc) <sub>2</sub>                                 | HOTf     | toluene            | 23                     |
| 5               | Pd(OAc) <sub>2</sub>                                 | TFA      | DMF                | trace                  |
| 6               | Pd(OAc) <sub>2</sub>                                 | TFA      | DMSO               | NR                     |
| 7               | Pd(OAc) <sub>2</sub>                                 | TFA      | TEF                | NR                     |
| 8               | Pd(OAc) <sub>2</sub>                                 | TFA      | CH <sub>3</sub> CN | NR                     |
| 9               | Pd(OAc) <sub>2</sub>                                 | TFA      | DCE                | NR                     |
| 10              | Pd(OAc) <sub>2</sub>                                 | TFA      | THF                | NR                     |
| 11              | Pd(OAc) <sub>2</sub>                                 | TFA      | dioxane            | NR                     |
| 12 <sup>c</sup> | Pd(OAc) <sub>2</sub>                                 | TFA      | toluene            | 26                     |
| 13 <sup>d</sup> | Pd(OAc) <sub>2</sub>                                 |          | toluene            | 0                      |
| 14 <sup>e</sup> |                                                      | TFA      | dioxane            | 0                      |
| 15 <sup>f</sup> | Pd(OAc) <sub>2</sub>                                 | TFA      | toluene            | 64                     |
| 16 <sup>g</sup> | Pd(OAc) <sub>2</sub>                                 | TFA      | toluene            | 71                     |
| 17 <sup>h</sup> | Pd(OAc) <sub>2</sub>                                 | TFA      | toluene            | 34                     |
| 18 <sup>i</sup> | Pd(OAc) <sub>2</sub>                                 | TFA      | toluene            | 51                     |
| 19              | Pd(TFA) <sub>2</sub>                                 | TFA      | toluene            | 72                     |
| 20              | Pd(acac) <sub>2</sub>                                | TFA      | toluene            | NR                     |
| 21              | Pd(PPh <sub>3</sub> ) <sub>4</sub>                   | TFA      | toluene            | NR                     |
| 22              | Pd(dba) <sub>2</sub>                                 | TFA      | toluene            | NR                     |
| 23              | [RhCp*Cl <sub>2</sub> ] <sub>2</sub>                 | TFA      | toluene            | NR                     |
| 24              | [IrCp*Cl <sub>2</sub> ] <sub>2</sub>                 | TFA      | toluene            | NR                     |
| 25              | [RuCl <sub>2</sub> ( <i>p</i> -cymene)] <sub>2</sub> | TFA      | Toluene            | NR                     |
| 26              | Cp*CoI <sub>2</sub> (CO)                             | TFA      | Toluene            | 14                     |

<sup>a</sup>Reaction conditions: 1.3-cyclohexanedione **1a** (0.2 mmol), styrene **2a** (0.3 mmol, 1.5 equiv), catalyst (5 mol%), Cu(OAc)<sub>2</sub> (2.0 equiv), additive (1.0 equiv), solvent (2 mL) at 120 °C for 12 h under air atmosphere. <sup>b</sup>Isolated yield; <sup>c</sup>Reaction carried out in the absence of Cu(OAc)<sub>2</sub>; <sup>d</sup>Reaction carried out in the absence of TFA; <sup>e</sup>Reaction carried out in the absence of Pd(OAc)<sub>2</sub>; <sup>f</sup>Reaction carried out in the absence of catalyst Pd(OAc)<sub>2</sub>; <sup>g</sup>Reaction carried out in the presence of 0.5 equiv TFA; <sup>h</sup>Reaction carried out in the presence of 2.0 equiv TFA; <sup>i</sup>Reaction carried out in the presence of 0.5 equiv Cu(OAc)<sub>2</sub>; <sup>j</sup>Reaction carried out in the presence of 2.0 equiv Cu(OAc)<sub>2</sub>.

---

Thus, we commenced our investigation with the treatment of 1.3-cyclohexanedione (**1a**) with styrene (**2a**) in the presence of Pd(OAc)<sub>2</sub> (5 mol%), Cu(OAc)<sub>2</sub> (2.0 equiv), and HOAc (1.0 equiv) in toluene at 120 °C, and annulation product 2-phenyl-6,7-dihydrobenzofuran-4(5*H*)-one (**3a**) was observed in 15% yield with good regioselectivity (Table 1, entry 1). Based on this finding, a variety of acid additives, such as PivOH, TFA, and HOTf, were examined, and TFA was found to be the best choice (Table 1, entries 2-4). Further, the screening of common organic solvents revealed that toluene is the best choice for this transformation (entries 5-11). Subsequently, control experiments proved that Pd(OAc)<sub>2</sub>, Cu(OAc)<sub>2</sub>, and PivOH were necessary for promoting higher product yield (entries 12-14). Furthermore, variations in the loading of Cu(OAc)<sub>2</sub>, and PivOH did not provide an improvement in yield of product **3a** (entries 15-18). Finally, changing Pd(OAc)<sub>2</sub> to other well-known palladium species (entries 19-22) and common high-efficiency oxidative annulations catalysts (entries 23-26) also obviously reduced yield or completely inhibited the reaction for the generation of **3a**.

### General Catalytic Procedure for the Synthesis of **3**

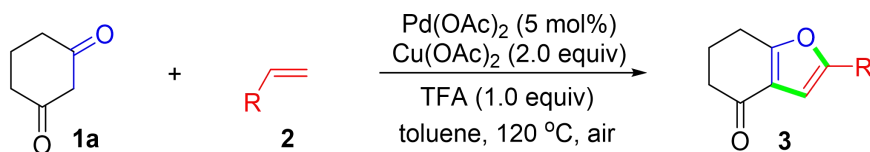

To a dry thick walled pressure resistant tube (25 mL) was charged with 1,3-cyclohexanedione **1a** (0.2 mmol, 1.0 equiv), olefines **2** (0.3 mmol, 1.5 equiv), Pd(OAc)<sub>2</sub> (2.3 mg, 5.0 mol%), Cu(OAc)<sub>2</sub> (0.4 mmol, 72.4 mg, 2.0 equiv), toluene (2 mL), then the TFA (0.2 mmol) was added. The tube was closed with a PTFE thread sealing cap. The mixture was stirred at 120 °C in oil bath for 12 hours under an atmosphere of air. After the reaction finished, the resulted mixtures were diluted with 20 mL of dichloromethane and washed with 20 mL of H<sub>2</sub>O. The aqueous layer was extracted twice with dichloromethane (10 mL) and the combined organic phase was dried over Na<sub>2</sub>SO<sub>4</sub>. After evaporation of the solvents, the residue was purified by silica gel chromatography (hexane/AcOEt = 10 : 1) to yield product.

### Procedure Gram-scale for the Synthesis of **3a**

To a dry thick walled pressure resistant tube (250 mL) was charged with 1,3-cyclohexanedione **1a** (5 mmol, 1.0 equiv), styrene **2** (7.5 mmol, 1.5 equiv), Pd(OAc)<sub>2</sub> (57.5 mg, 5 mol%), Cu(OAc)<sub>2</sub> (10 mmol, 1810 mg, 2.0 equiv), toluene (50 mL), then the TFA (5 mmol) was added. The tube was closed with a PTFE thread sealing cap. The mixture was stirred at 120 °C in oil bath for 12 hours under an atmosphere of air. After the reaction finished, the resulted mixtures were diluted with 20 mL of dichloromethane and washed with 20 mL of H<sub>2</sub>O. The aqueous layer was extracted twice with dichloromethane (100 mL) and the combined organic phase was dried over Na<sub>2</sub>SO<sub>4</sub>. After evaporation of the solvents, the residue was purified by silica gel chromatography (hexane/AcOEt = 10 : 1) to yield product **3a** (61% yield, 646.6 mg).

## General Catalytic Procedure for the Synthesis of **4**

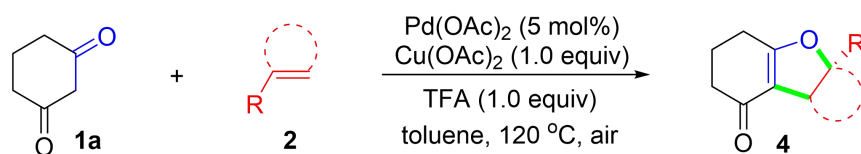

To a dry thick walled pressure resistant tube (25 mL) was charged with 1,3-cyclohexanedione **1a** (0.2 mmol, 1.0 equiv), olefines **2** (0.3 mmol, 1.5 equiv), Pd(OAc)<sub>2</sub> (2.3 mg, 5.0 mol%), Cu(OAc)<sub>2</sub> (0.4 mmol, 72.4 mg, 2.0 equiv), toluene (2 mL), then the TFA (0.2 mmol) was added. The tube was closed with a PTFE thread sealing cap. The mixture was stirred at 120 °C in oil bath for 12 hours under an atmosphere of air. After the reaction finished, the resulted mixtures were diluted with 20 mL of dichloromethane and washed with 20 mL of H<sub>2</sub>O. The aqueous layer was extracted twice with dichloromethane (10 mL) and the combined organic phase was dried over Na<sub>2</sub>SO<sub>4</sub>. After evaporation of the solvents, the residue was purified by silica gel chromatography (hexane/AcOEt = 10 : 1) to yield product.

## General Catalytic Procedure for for the Synthesis of 5

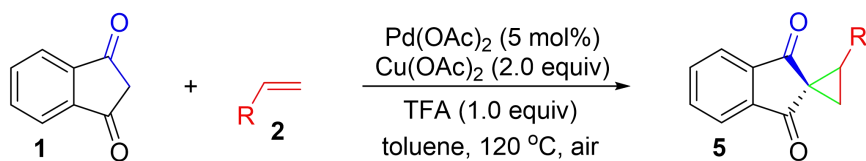

To a dry thick walled pressure resistant tube (25 mL) was charged with 1,3-indindanone **1a** (0.2 mmol, 1.0 equiv), olefines **2** (0.3 mmol, 1.5 equiv), Pd(OAc)<sub>2</sub> (2.3 mg, 5.0 mol%), Cu(OAc)<sub>2</sub> (0.4 mmol, 72.4 mg, 2.0 equiv), toluene (2 mL), then the TFA (0.2 mmol) was added. The tube was closed with a PTFE thread sealing cap. The mixture was stirred at 120 °C in oil bath for 12 hours under an atmosphere of air. After the reaction finished, the resulted mixtures were diluted with 20 mL of dichloromethane and washed with 20 mL of H<sub>2</sub>O. The aqueous layer was extracted twice with dichloromethane (10 mL) and the combined organic phase was dried over Na<sub>2</sub>SO<sub>4</sub>. After evaporation of the solvents, the residue was purified by silica gel chromatography (hexane/AcOEt = 20 : 1) to yield product.



## Mechanistic Study

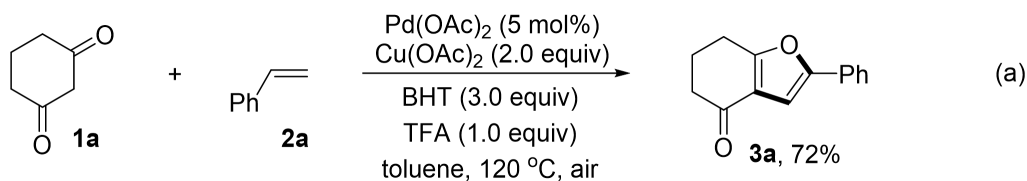

To a dry thick walled pressure resistant tube (25 mL) was charged with cyclopentane-1,3-dione (0.2 mmol, 1.0 equiv), styrene (0.3 mmol, 1.5 equiv), Pd(OAc)<sub>2</sub> (2.3 mg, 5.0 mol%), Cu(OAc)<sub>2</sub> (0.4 mmol, 72.4 mg, 2.0 equiv), BHT (3.0 mmol), toluene (2 mL), then the TFA (0.2 mmol) was added. The tube was closed with a PTFE thread sealing cap. The mixture was stirred at 120 °C in oil bath for 12 hours under an atmosphere of air. After the reaction finished, the resulted mixtures were diluted with 20 mL of dichloromethane and washed with 20 mL of H<sub>2</sub>O. The aqueous layer was extracted twice with dichloromethane (10 mL) and the combined organic phase was dried over Na<sub>2</sub>SO<sub>4</sub>. After evaporation of the solvents, the residue was purified by silica gel chromatography (hexane/AcOEt = 10 : 1) to yield product.

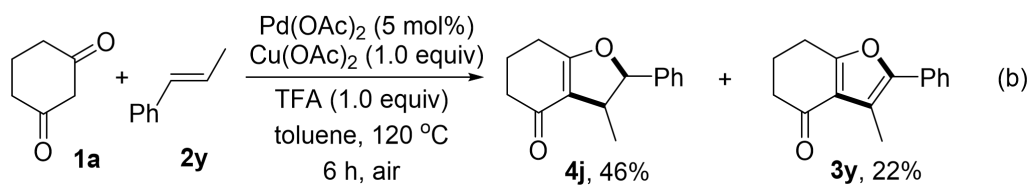

To a dry thick walled pressure resistant tube (25 mL) was charged with cyclopentane-1,3-dione (0.2 mmol, 1.0 equiv), prop-1-en-1-ylbenzene (0.3 mmol, 1.5 equiv), Pd(OAc)<sub>2</sub> (2.3 mg, 5.0 mol%), Cu(OAc)<sub>2</sub> (0.4 mmol, 72.4 mg, 2.0 equiv), toluene (2 mL), then the TFA (0.2 mmol) was added. The tube was closed with a PTFE thread sealing cap. The mixture was stirred at 120 °C in oil bath for 6 hours under an atmosphere of air. After the reaction finished, the resulted mixtures were diluted with 20 mL of dichloromethane and washed with 20 mL of H<sub>2</sub>O. The aqueous layer was extracted twice with dichloromethane (10 mL) and the combined organic phase was dried over Na<sub>2</sub>SO<sub>4</sub>. After evaporation of the solvents, the residue was purified by silica gel chromatography (hexane/AcOEt = 10 : 1) to yield product.

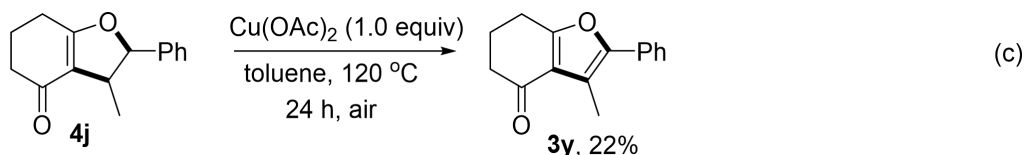

To a dry thick walled pressure resistant tube (25 mL) was charged with 3-methyl-2-phenyl-3,5,6,7-tetrahydrobenzofuran-4(2*H*)-one (0.2 mmol, 1.0 equiv), Cu(OAc)<sub>2</sub> (0.2 mmol, 1.0 equiv), toluene (2 mL). The tube was closed with a PTFE thread sealing cap. The mixture was stirred at 120 °C in oil bath for 24 hours under an atmosphere of air. After the reaction finished, the resulted mixtures were diluted with 20 mL of dichloromethane and washed with 20 mL of H<sub>2</sub>O. The aqueous layer was extracted twice with dichloromethane (10 mL) and the combined organic phase was dried over Na<sub>2</sub>SO<sub>4</sub>. After evaporation of the solvents, the residue was purified by silica gel chromatography (hexane/AcOEt = 10 : 1) to yield product **3y**.

## X-Ray Crystallographic Data

### Crystal Structure Details for Product 4g (CCDC 2350852)

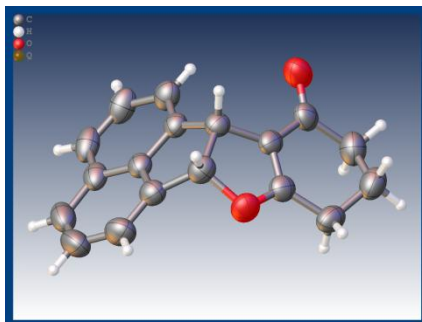

**Table 1 Crystal data and structure refinement for 1**

|                                             |                                                               |
|---------------------------------------------|---------------------------------------------------------------|
| Identification code                         | 1                                                             |
| Empirical formula                           | C <sub>18</sub> H <sub>14</sub> O <sub>2</sub>                |
| Formula weight                              | 262.29                                                        |
| Temperature/K                               | 298.00                                                        |
| Crystal system                              | monoclinic                                                    |
| Space group                                 | P2 <sub>1</sub> /c                                            |
| a/Å                                         | 11.2312(4)                                                    |
| b/Å                                         | 14.7726(6)                                                    |
| c/Å                                         | 8.2671(3)                                                     |
| α/°                                         | 90                                                            |
| β/°                                         | 109.0620(10)                                                  |
| γ/°                                         | 90                                                            |
| Volume/Å <sup>3</sup>                       | 1296.42(8)                                                    |
| Z                                           | 4                                                             |
| ρ <sub>calc</sub> /cm <sup>3</sup>          | 1.344                                                         |
| μ/mm <sup>-1</sup>                          | 0.087                                                         |
| F(000)                                      | 552.0                                                         |
| Crystal size/mm <sup>3</sup>                | ? × ? × ?                                                     |
| Radiation                                   | MoKα (λ = 0.71073)                                            |
| 2θ range for data collection/               | 4.726 to 50.014                                               |
| Index ranges                                | -13 ≤ h ≤ 13, -17 ≤ k ≤ 17, -9 ≤ l ≤ 9                        |
| Reflections collected                       | 25739                                                         |
| Independent reflections                     | 2275 [R <sub>int</sub> = 0.0584, R <sub>sigma</sub> = 0.0234] |
| Data/restraints/parameters                  | 2275/0/181                                                    |
| Goodness-of-fit on F <sup>2</sup>           | 1.050                                                         |
| Final R indexes [I >= 2σ (I)]               | R <sub>1</sub> = 0.0418, wR <sub>2</sub> = 0.1149             |
| Final R indexes [all data]                  | R <sub>1</sub> = 0.0508, wR <sub>2</sub> = 0.1233             |
| Largest diff. peak/hole / e Å <sup>-3</sup> | 0.29/-0.16                                                    |

## Characterization data for the products

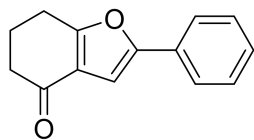

2-Phenyl-6,7-dihydrobenzofuran-4(5H)-one (**3a**):<sup>1</sup> Obtained as a pale yellow liquid (32.6 mg, 77% yield), eluting with 10% EtOAc in PE (elution gradient); <sup>1</sup>H NMR (400 MHz, CDCl<sub>3</sub>)  $\delta$  7.55 (d,  $J$  = 7.6 Hz, 2H), 7.27 - 7.33 (m, 2H), 7.18 - 7.21 (t, 1H), 6.79 (s, 1H), 2.82 - 2.85 (t, 2H), 2.41 - 2.44 (t, 2H), 2.07 - 2.13 (m, 2H); <sup>13</sup>C NMR (101 MHz, CDCl<sub>3</sub>)  $\delta$  194.4, 166.6, 154.1, 129.7, 128.7, 128.0, 123.9, 122.8, 100.8, 37.5, 23.3, 22.4; HRMS (ESI-TOF)  $m/z$  calcd for C<sub>14</sub>H<sub>13</sub>O<sub>2</sub> [M + H]<sup>+</sup> 213.0910, found 213.0913.

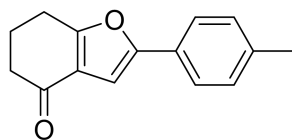

2-(*p*-Tolyl)-6,7-dihydrobenzofuran-4(5H)-one (**3b**): Obtained as a pale yellow liquid (36.6 mg, 81% yield), eluting with 10% EtOAc in PE (elution gradient); <sup>1</sup>H NMR (400 MHz, CDCl<sub>3</sub>)  $\delta$  7.44 (d,  $J$  = 8.0 Hz, 2H), 7.10 (d,  $J$  = 7.6 Hz, 2H), 6.73 (s, 1H), 2.82 - 2.85 (t, 2H), 2.40 - 2.43 (t, 2H), 2.27 (s, 3H), 2.07 - 2.13 (t, 2H); <sup>13</sup>C NMR (101 MHz, CDCl<sub>3</sub>)  $\delta$  194.5, 166.3, 154.4, 138.0, 129.4, 127.0, 123.8, 122.8, 100.0, 37.5, 23.3, 22.5, 21.2; HRMS (ESI-TOF)  $m/z$  calcd for C<sub>15</sub>H<sub>15</sub>O<sub>2</sub> [M + H]<sup>+</sup> 227.1067, found 227.1069.

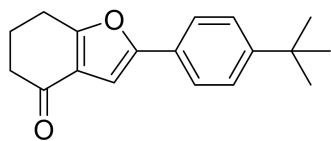

2-(4-(Tert-butyl)phenyl)-6,7-dihydrobenzofuran-4(5H)-one (**3c**): Obtained as a pale yellow liquid (42.3 mg, 79% yield), eluting with 10% EtOAc in PE (elution gradient); <sup>1</sup>H NMR (400 MHz, CDCl<sub>3</sub>)  $\delta$  7.49 (d,  $J$  = 8.0 Hz, 2H), 7.32 (d,  $J$  = 8.0 Hz, 2H), 6.74 (s, 1H), 2.82 - 2.85 (t, 2H), 2.40 - 2.43 (t, 2H), 2.09 - 2.12 (t, 2H), 1.24 (s, 9H); <sup>13</sup>C NMR (101 MHz, CDCl<sub>3</sub>)  $\delta$  194.5, 166.4, 154.3, 151.2, 127.0, 125.6, 123.7, 122.8, 100.1, 37.5, 34.6, 31.1, 23.3, 22.5; HRMS (ESI-TOF)  $m/z$  calcd for C<sub>18</sub>H<sub>21</sub>O<sub>2</sub> [M + H]<sup>+</sup> 269.1536, found 269.1535.

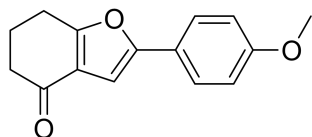

2-(4-Methoxyphenyl)-6,7-dihydrobenzofuran-4(5H)-one

**(3d)**:<sup>1</sup> Obtained as a pale yellow liquid (36.8 mg, 76% yield), eluting with 10% EtOAc in PE (elution gradient); <sup>1</sup>H NMR (400 MHz, CDCl<sub>3</sub>) δ 7.49 (d, *J* = 8.4 Hz, 2H), 6.84 (d, *J* = 8.4 Hz, 2H), 6.65 (s, 1H), 3.74 (s, 3H), 2.83 - 2.86 (t, 2H), 2.41 - 2.44 (t, 2H), 2.10 - 2.14 (m, 2H); <sup>13</sup>C NMR (101 MHz, CDCl<sub>3</sub>) δ 194.6, 166.1, 159.5, 154.2, 125.4, 122.8, 122.7, 114.2, 99.1, 55.3, 37.5, 23.3, 22.5; HRMS (ESI-TOF) *m/z* calcd for C<sub>15</sub>H<sub>19</sub>O<sub>3</sub> [M + H]<sup>+</sup> 243.1016, found 243.1014.

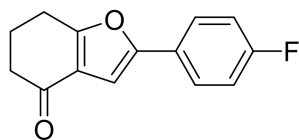

2-(4-Fluorophenyl)-6,7-dihydrobenzofuran-4(5H)-one **(3e)**:

Obtained as a pale yellow liquid (33.6 mg, 73% yield), eluting with 10% EtOAc in PE (elution gradient); <sup>1</sup>H NMR (400 MHz, CDCl<sub>3</sub>) δ 7.50 - 7.53 (t, 2H), 6.96 - 7.00 (t, 2H), 6.71 (s, 1H), 2.82 - 2.86 (t, 2H), 2.41 - 2.44 (t, 2H), 2.08 - 2.14 (m, 2H); <sup>13</sup>C NMR (101 MHz, CDCl<sub>3</sub>) δ 194.3, 166.5, 162.4 (d, *J* = 246.6 Hz), 153.2, 125.7 (d, *J* = 8.1 Hz), 122.8, 115.8 (d, *J* = 21.9 Hz), 100.5 (d, *J* = 1.3 Hz), 37.5, 23.3, 22.4; <sup>19</sup>F NMR (400 MHz, CDCl<sub>3</sub>) δ -113.0; HRMS (ESI-TOF) *m/z* calcd for C<sub>14</sub>H<sub>12</sub>FO<sub>2</sub> [M + H]<sup>+</sup> 231.0816, found 231.0818.

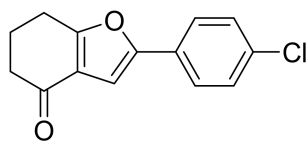

2-(4-Chlorophenyl)-6,7-dihydrobenzofuran-4(5H)-one **(3f)**:

Obtained as a pale yellow liquid (36.9 mg, 75% yield), eluting with 10% EtOAc in PE (elution gradient); <sup>1</sup>H NMR (400 MHz, CDCl<sub>3</sub>) δ 7.47 (d, *J* = 8.0 Hz, 2H), 7.26 (d, *J* = 8.4 Hz, 2H), 6.77 (s, 1H), 2.84 - 2.87 (t, 2H), 2.42 - 2.45 (t, 2H), 2.09 - 2.15 (t, 2H); <sup>13</sup>C NMR (101 MHz, CDCl<sub>3</sub>) δ 194.3, 166.8, 153.0, 133.7, 128.9, 128.2, 125.1, 122.9, 101.3, 37.5, 23.3, 22.4; HRMS (ESI-TOF) *m/z* calcd for C<sub>14</sub>H<sub>12</sub>ClO<sub>2</sub> [M + H]<sup>+</sup> 247.0520, found 247.0521.

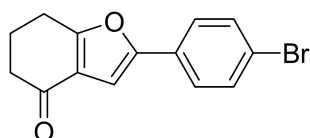

2-(4-Bromophenyl)-6,7-dihydrobenzofuran-4(5H)-one (**3g**):<sup>1</sup>

Obtained as a pale yellow liquid (42.9 mg, 74% yield), eluting with 10% EtOAc in PE (elution gradient); <sup>1</sup>H NMR (400 MHz, CDCl<sub>3</sub>) δ 7.43 (s, 4H), 6.80 (s, 1H), 2.84 - 2.88 (t, 2H), 2.43 - 2.46 (t, 2H), 2.10 - 2.16 (t, 2H); <sup>13</sup>C NMR (101 MHz, CDCl<sub>3</sub>) δ 194.3, 166.8, 153.1, 131.9, 128.7, 125.4, 122.9, 121.9, 101.4, 37.5, 23.4, 22.4; HRMS (ESI-TOF) m/z calcd for C<sub>14</sub>H<sub>12</sub>BrO<sub>2</sub> [M + H]<sup>+</sup> 291.0015, found 291.0014.

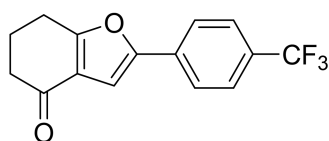

2-(4-(Trifluoromethyl)phenyl)-6,7-dihydrobenzofuran-4(5H)

-one (**3h**): Obtained as a pale yellow liquid (38.6 mg, 69% yield), eluting with 10% EtOAc in PE (elution gradient); <sup>1</sup>H NMR (400 MHz, CDCl<sub>3</sub>) δ 7.65 (d, *J* = 8.0 Hz, 2H), 7.55 (d, *J* = 8.4 Hz, 2H), 6.91 (s, 1H), 2.87 - 2.90 (t, 2H), 2.44 - 2.47 (t, 2H), 2.12 - 2.18 (t, 2H); <sup>13</sup>C NMR (101 MHz, CDCl<sub>3</sub>) δ 194.2, 167.4, 152.6, 132.9, 129.6 (q, *J* = 32.3, 64.9 Hz), 125.8 (q, *J* = 3.7, 7.5 Hz), 125.71, 125.5 (q, *J* = 270.4, 501.6 Hz), 123.0, 102.9, 37.5, 23.4, 22.4; <sup>19</sup>F NMR (400 MHz, CDCl<sub>3</sub>) δ -62.7; HRMS (ESI-TOF) m/z calcd for C<sub>15</sub>H<sub>12</sub>F<sub>3</sub>O<sub>2</sub> [M + H]<sup>+</sup> 281.0784, found 281.0782.

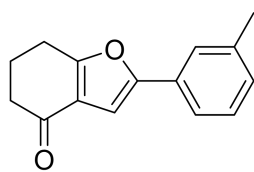

2-(*m*-Tolyl)-6,7-dihydrobenzofuran-4(5H)-one (**3i**): Obtained as a

pale yellow liquid (36.2 mg, 80% yield), eluting with 10% EtOAc in PE (elution gradient); <sup>1</sup>H NMR (400 MHz, CDCl<sub>3</sub>) δ 7.34 - 7.37 (m, 2H), 7.16 - 7.20 (t, 1H), 7.01 (d, *J* = 7.6 Hz, 1H), 6.77 (s, 1H), 2.82 - 2.85 (t, 2H), 2.40 - 2.43 (t, 2H), 2.28 (s, 3H), 2.07 - 2.11 (t, 2H); <sup>13</sup>C NMR (101 MHz, CDCl<sub>3</sub>) δ 194.4, 166.5, 154.3, 138.3, 129.6, 128.8, 128.6, 124.5, 122.8, 121.1, 100.6, 37.5, 23.3, 22.5, 21.4; HRMS (ESI-TOF) m/z calcd for C<sub>15</sub>H<sub>15</sub>O<sub>2</sub> [M + H]<sup>+</sup> 227.1067, found 227.1066.

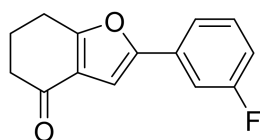

2-(3-Fluorophenyl)-6,7-dihydrobenzofuran-4(5H)-one (**3j**):

Obtained as a pale yellow liquid (32.2 mg, 70% yield), eluting with 10% EtOAc in PE (elution gradient);  $^1\text{H}$  NMR (400 MHz,  $\text{CDCl}_3$ )  $\delta$  7.68 - 7.71 (t, 1H), 7.15 - 7.20 (q, 1H), 7.00 - 7.12 (m, 3H), 2.86 - 2.89 (t, 2H), 2.44 - 2.47 (t, 2H), 2.11 - 2.17 (t, 2H);  $^{13}\text{C}$  NMR (101 MHz,  $\text{CDCl}_3$ )  $\delta$  194.3, 166.4, 158.7 (d,  $J = 250.3$  Hz), 148.3 (d,  $J = 2.9$  Hz), 129.0 (d,  $J = 2.8$  Hz), 124.2 (d,  $J = 3.5$  Hz), 123.1, 118.1 (d,  $J = 11.8$  Hz), 116.0 (d,  $J = 18.2$  Hz), 105.9 (d,  $J = 12.0$  Hz), 37.6, 23.3, 22.5;  $^{19}\text{F}$  NMR (400 MHz,  $\text{CDCl}_3$ )  $\delta$  -113.1; HRMS (ESI-TOF)  $m/z$  calcd for  $\text{C}_{14}\text{H}_{12}\text{FO}_2$   $[\text{M} + \text{H}]^+$  231.0816, found 231.0818.

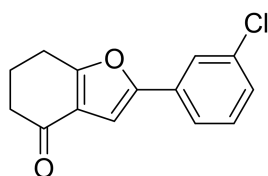

2-(3-Chlorophenyl)-6,7-dihydrobenzofuran-4(5H)-one (**3k**):

Obtained as a pale yellow liquid (34.9 mg, 71% yield), eluting with 10% EtOAc in PE (elution gradient);  $^1\text{H}$  NMR (400 MHz,  $\text{CDCl}_3$ )  $\delta$  7.54 (s, 1H), 7.41 (d,  $J = 8.0$  Hz, 1H), 7.15 - 7.24 (m, 2H), 6.81 (s, 1H), 2.84 - 2.87 (t, 2H), 2.42 - 2.45 (t, 2H), 2.10 - 2.16 (t, 2H);  $^{13}\text{C}$  NMR (101 MHz,  $\text{CDCl}_3$ )  $\delta$  194.2, 167.0, 152.6, 134.8, 131.4, 130.0, 127.9, 123.8, 122.9, 121.9, 101.9, 37.5, 23.3, 22.4; HRMS (ESI-TOF)  $m/z$  calcd for  $\text{C}_{14}\text{H}_{12}\text{ClO}_2$   $[\text{M} + \text{H}]^+$  247.0520, found 247.0522.

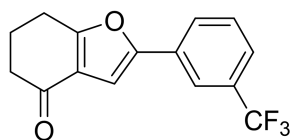

2-(3-(Trifluoromethyl)phenyl)-6,7-dihydrobenzofuran-4(5H)-one (**3l**): Obtained as a pale yellow liquid (35.8 mg, 64% yield), eluting with 10% EtOAc in PE (elution gradient);  $^1\text{H}$  NMR (400 MHz,  $\text{CDCl}_3$ )  $\delta$  7.80 (s, 1H), 7.69 (d,  $J = 7.2$  Hz, 1H), 7.38 - 7.44 (m, 2H), 6.87 (s, 1H), 2.86 - 2.89 (t, 2H), 2.43 - 2.46 (t, 2H), 2.10 - 2.16 (t, 2H);  $^{13}\text{C}$  NMR (101 MHz,  $\text{CDCl}_3$ )  $\delta$  194.2, 167.1, 152.5, 131.2 (q,  $J = 32.3$ , 64.6 Hz), 130.4, 129.3, 128.1 (t,  $J = 42.5$  Hz), 126.9, 125.2, 124.4 (q,  $J = 3.5$ , 7.2 Hz), 122.9, 122.5, 120.5 (q,  $J = 3.8$ , 7.7 Hz), 102.2, 37.5, 23.3, 22.4;  $^{19}\text{F}$  NMR



(400 MHz, CDCl<sub>3</sub>)  $\delta$  -62.9; HRMS (ESI-TOF)  $m/z$  calcd for C<sub>15</sub>H<sub>12</sub>F<sub>3</sub>O<sub>2</sub> [M + H]<sup>+</sup> 281.0784, found 281.0787.

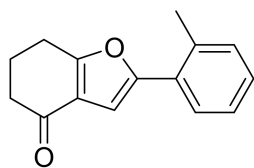

2-(*o*-Tolyl)-6,7-dihydrobenzofuran-4(5H)-one (**3m**): Obtained as a pale yellow liquid (34.4 mg, 76% yield), eluting with 10% EtOAc in PE (elution gradient); <sup>1</sup>H NMR (400 MHz, CDCl<sub>3</sub>)  $\delta$  7.60 (d,  $J$  = 6.8 Hz, 1H), 7.15 - 7.18 (m, 3H), 6.69 (s, 1H), 2.84 - 2.87 (t, 2H), 2.43 - 2.46 (t, 2H), 2.39 (s, 3H), 2.11 - 2.16 (m, 2H); <sup>13</sup>C NMR (101 MHz, CDCl<sub>3</sub>)  $\delta$  194.6, 166.3, 153.5, 134.8, 131.2, 129.0, 128.0, 126.9, 126.0, 122.7, 104.5, 37.5, 23.3, 22.5, 21.8; HRMS (ESI-TOF)  $m/z$  calcd for C<sub>15</sub>H<sub>15</sub>O<sub>2</sub> [M + H]<sup>+</sup> 227.1067, found 227.1068.

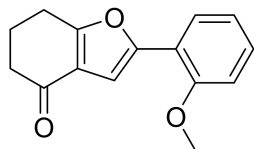

2-(2-Methoxyphenyl)-6,7-dihydrobenzofuran-4(5H)-one (**3n**): Obtained as a pale yellow liquid (33.9 mg, 70% yield), eluting with 10% EtOAc in PE (elution gradient); <sup>1</sup>H NMR (400 MHz, CDCl<sub>3</sub>)  $\delta$  7.73 (d,  $J$  = 7.6 Hz, 1H), 7.17 - 7.21 (t, 1H), 7.11 (s, 1H), 6.87 - 6.95 (m, 2H), 3.85 (s, 3H), 2.85 - 2.88 (t, 2H), 2.43 - 2.46 (t, 2H), 2.09 - 2.16 (t, 2H); <sup>13</sup>C NMR (101 MHz, CDCl<sub>3</sub>)  $\delta$  194.8, 165.9, 155.6, 150.5, 128.7, 125.8, 123.0, 120.5, 118.7, 110.9, 105.7, 55.3, 37.6, 23.4, 22.5; HRMS (ESI-TOF)  $m/z$  calcd for C<sub>15</sub>H<sub>19</sub>O<sub>3</sub> [M + H]<sup>+</sup> 243.1016, found 243.1017.

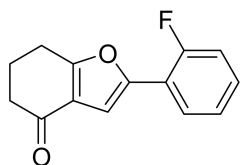

2-(2-Fluorophenyl)-6,7-dihydrobenzofuran-4(5H)-one (**3o**): Obtained as a pale yellow liquid (30.4 mg, 66% yield), eluting with 10% EtOAc in PE (elution gradient); <sup>1</sup>H NMR (400 MHz, CDCl<sub>3</sub>)  $\delta$  7.32 (d,  $J$  = 7.6 Hz, 1H), 7.23 - 7.28 (t, 2H), 6.87 - 6.91 (t, 1H), 6.81 (s, 1H), 2.84 - 2.87 (t, 2H), 2.42 - 2.45 (t, 2H), 2.10 - 2.16 (m, 2H); <sup>13</sup>C NMR (101 MHz, CDCl<sub>3</sub>)  $\delta$  194.2, 166.9, 163.0 (d,  $J$  = 244.3 Hz),

152.8 (d,  $J = 3.0$  Hz), 131.7 (d,  $J = 8.5$  Hz), 130.4 (d,  $J = 8.4$  Hz), 122.9, 119.5 (d,  $J = 2.9$  Hz), 114.8 (d,  $J = 21.2$  Hz), 110.8 (d,  $J = 23.6$  Hz), 101.9, 37.5, 23.3, 22.4;  $^{19}\text{F}$  NMR (400 MHz,  $\text{CDCl}_3$ )  $\delta$  -112.4; HRMS (ESI-TOF)  $m/z$  calcd for  $\text{C}_{14}\text{H}_{12}\text{FO}_2$  [ $\text{M} + \text{H}$ ] $^+$  231.0816, found 231.0815.

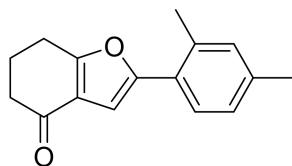

2-(2,4-Dimethylphenyl)-6,7-dihydrobenzofuran-4(5H)-one

**(3p)**: Obtained as a pale yellow liquid (39.4 mg, 82% yield), eluting with 10% EtOAc in PE (elution gradient);  $^1\text{H}$  NMR (400 MHz,  $\text{CDCl}_3$ )  $\delta$  7.44 (s, 1H), 7.07 (d,  $J = 7.6$  Hz, 1H), 6.98 (d,  $J = 7.6$  Hz, 1H), 6.69 (s, 1H), 2.87 - 2.90 (t, 2H), 2.45 - 2.48 (t, 2H), 2.36 (s, 3H), 2.29 (s, 3H), 2.13 - 2.19 (t, 2H);  $^{13}\text{C}$  NMR (101 MHz,  $\text{CDCl}_3$ )  $\delta$  194.7, 166.2, 153.7, 135.5, 131.9, 131.2, 128.9, 128.8, 127.5, 122.8, 104.4, 37.6, 23.4, 22.6, 21.4, 21.0; HRMS (ESI-TOF)  $m/z$  calcd for  $\text{C}_{16}\text{H}_{17}\text{O}_2$  [ $\text{M} + \text{H}$ ] $^+$  241.1223, found 241.1225.

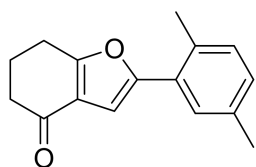

2-(2,5-Dimethylphenyl)-6,7-dihydrobenzofuran-4(5H)-one (**3q**):

Obtained as a pale yellow liquid (40.3 mg, 84% yield), eluting with 10% EtOAc in PE (elution gradient);  $^1\text{H}$  NMR (400 MHz,  $\text{CDCl}_3$ )  $\delta$  7.54 (s, 1H), 7.16 (d,  $J = 7.6$  Hz, 1H), 7.07 (d,  $J = 7.6$  Hz, 1H), 6.80 (s, 1H), 2.96 - 2.99 (t, 2H), 2.54 - 2.58 (t, 2H), 2.46 (s, 3H), 2.39 (s, 3H), 2.23 - 2.26 (t, 2H);  $^{13}\text{C}$  NMR (101 MHz,  $\text{CDCl}_3$ )  $\delta$  194.6, 166.1, 153.6, 135.4, 131.7, 131.1, 128.8, 128.7, 127.4, 122.7, 104.3, 37.5, 23.3, 22.5, 21.3, 20.9; HRMS (ESI-TOF)  $m/z$  calcd for  $\text{C}_{16}\text{H}_{17}\text{O}_2$  [ $\text{M} + \text{H}$ ] $^+$  241.1223, found 241.1222.

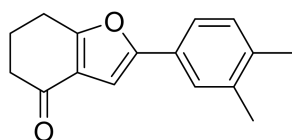

2-(3,4-Dimethylphenyl)-6,7-dihydrobenzofuran-4(5H)-one (**3r**):

Obtained as a pale yellow liquid (40.8 mg, 85% yield), eluting with 10% EtOAc in PE (elution gradient);  $^1\text{H}$  NMR (400 MHz,  $\text{CDCl}_3$ )  $\delta$  7.34 (s, 1H), 7.29 (d,  $J = 8.0$  Hz, 1H), 7.05 (d,  $J = 7.6$  Hz, 1H), 6.72 (s, 1H), 2.83 - 2.86 (t, 2H), 2.41 - 2.44 (t, 2H), 2.20 (s, 3H), 2.18 (s, 3H), 2.09 - 2.12 (t, 2H);  $^{13}\text{C}$  NMR (101 MHz,  $\text{CDCl}_3$ )  $\delta$  194.5, 166.3, 154.5, 136.9, 136.7, 130.0, 127.4, 125.1, 122.8, 121.4, 99.9, 37.6, 23.4, 22.5, 19.8, 19.5; HRMS (ESI-TOF)  $m/z$  calcd for  $\text{C}_{16}\text{H}_{17}\text{O}_2$   $[\text{M} + \text{H}]^+$  241.1223, found 241.1223.

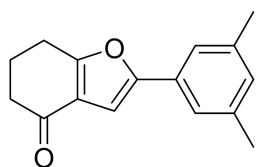

2-(3,5-Dimethylphenyl)-6,7-dihydrobenzofuran-4(5H)-one (**3s**):

Obtained as a pale yellow liquid (42.7 mg, 89% yield), eluting with 10% EtOAc in PE (elution gradient);  $^1\text{H}$  NMR (400 MHz,  $\text{CDCl}_3$ )  $\delta$  7.18 (s, 2H), 6.84 (s, 1H), 6.75 (s, 1H), 2.82 - 2.85 (t, 2H), 2.40 - 2.43 (t, 2H), 2.25 (s, 3H), 2.07 - 2.13 (m, 2H);  $^{13}\text{C}$  NMR (101 MHz,  $\text{CDCl}_3$ )  $\delta$  194.4, 166.4, 154.5, 138.2, 129.8, 129.5, 122.8, 121.7, 100.5, 37.5, 23.3, 22.5, 21.2; HRMS (ESI-TOF)  $m/z$  calcd for  $\text{C}_{16}\text{H}_{17}\text{O}_2$   $[\text{M} + \text{H}]^+$  241.1223, found 241.1224.

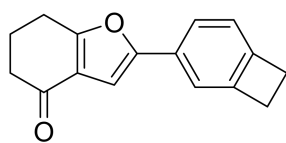

2-(Bicyclo[4.2.0]octa-1(6),2,4-trien-3-yl)-6,7-dihydrobenzofuran-4(5H)-one (**3t**):

Obtained as a pale yellow liquid (40.5 mg, 85% yield), eluting with 10% EtOAc in PE (elution gradient);  $^1\text{H}$  NMR (400 MHz,  $\text{CDCl}_3$ )  $\delta$  6.43 (d,  $J = 7.6$  Hz, 1H), 7.26 (s, 1H), 6.99 (d,  $J = 7.6$  Hz, 1H), 6.72 (s, 1H), 3.12 (s, 4H), 2.85 - 2.88 (t, 2H), 2.43 - 2.46 (t, 2H), 2.12 - 2.15 (t, 2H);  $^{13}\text{C}$  NMR (101 MHz,  $\text{CDCl}_3$ )  $\delta$  194.6, 166.3, 155.2, 146.3, 146.1, 128.6, 122.9, 122.9, 122.8, 118.2, 99.9, 37.6, 29.6, 29.4, 23.4, 22.6; HRMS (ESI-TOF)  $m/z$  calcd for  $\text{C}_{16}\text{H}_{15}\text{O}_2$   $[\text{M} + \text{H}]^+$  239.1067, found 239.1065.

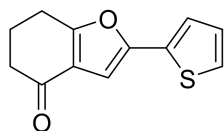

2-(Thiophen-2-yl)-6,7-dihydrobenzofuran-4(5H)-one (**3u**): Obtained as a pale yellow liquid (31.0 mg, 71% yield), eluting with 10% EtOAc in PE (elution gradient);  $^1\text{H}$  NMR (400 MHz,  $\text{CDCl}_3$ )  $\delta$  7.18 - 7.20 (m, 2H), 6.96 - 6.98 (t, 1H), 6.65 (s, 1H), 2.84 - 2.87 (t, 2H), 2.43 - 2.46 (t, 2H), 2.10 - 2.16 (m, 2H);  $^{13}\text{C}$  NMR (101 MHz,  $\text{CDCl}_3$ )  $\delta$  194.3, 166.3, 149.7, 132.4, 127.7, 125.1, 123.6, 122.8, 100.7, 37.6, 23.4, 22.5; HRMS (ESI-TOF)  $m/z$  calcd for  $\text{C}_{12}\text{H}_{11}\text{O}_2\text{S}$   $[\text{M} + \text{H}]^+$  219.0474, found 219.0476.

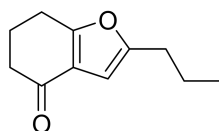

2-Propyl-6,7-dihydrobenzofuran-4(5H)-one (**3v**): Obtained as a pale yellow liquid (31.0 mg, 87% yield), eluting with 10% EtOAc in PE (elution gradient);  $^1\text{H}$  NMR (400 MHz,  $\text{CDCl}_3$ )  $\delta$  6.26 (s, 1H), 2.82 - 2.85 (t, 2H), 2.56 - 2.60 (t, 2H), 2.45 - 2.49 (t, 2H), 2.13 - 2.19 (m, 2H), 1.61 - 1.70 (m, 2H), 0.95 - 0.98 (t, 3H);  $^{13}\text{C}$  NMR (101 MHz,  $\text{CDCl}_3$ )  $\delta$  194.7, 165.9, 156.8, 121.8, 101.2, 37.5, 29.7, 23.3, 22.6, 21.0, 13.6; HRMS (ESI-TOF)  $m/z$  calcd for  $\text{C}_{11}\text{H}_{15}\text{O}_2$   $[\text{M} + \text{H}]^+$  179.1067, found 179.1069.

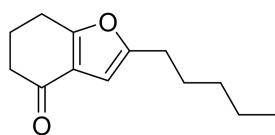

2-Pentyl-6,7-dihydrobenzofuran-4(5H)-one (**3w**): Obtained as a pale yellow liquid (26.4 mg, 64% yield), eluting with 10% EtOAc in PE (elution gradient);  $^1\text{H}$  NMR (400 MHz,  $\text{CDCl}_3$ )  $\delta$  6.25 (s, 1H), 2.82 - 2.85 (t, 2H), 2.57 - 2.61 (t, 2H), 2.46 - 2.49 (t, 2H), 2.13 - 2.19 (m, 2H), 1.59 - 1.67 (m, 2H), 1.31 - 1.35 (m, 4H), 0.88 - 0.92 (t, 3H);  $^{13}\text{C}$  NMR (101 MHz,  $\text{CDCl}_3$ )  $\delta$  194.8, 165.9, 157.1, 121.8, 101.1, 37.5, 31.2, 27.7, 27.3, 23.3, 22.6, 22.3, 13.9; HRMS (ESI-TOF)  $m/z$  calcd for  $\text{C}_{13}\text{H}_{19}\text{O}_2$   $[\text{M} + \text{H}]^+$  207.1380, found 207.1381.

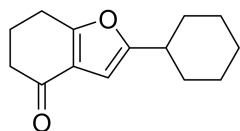

2-Cyclohexyl-6,7-dihydrobenzofuran-4(5H)-one (**3x**): Obtained as a pale yellow liquid (28.3 mg, 65% yield), eluting with 10% EtOAc in PE (elution gradient);  $^1\text{H}$  NMR (400 MHz,  $\text{CDCl}_3$ )  $\delta$  6.22 (s, 1H), 2.82 - 2.85 (t, 2H), 2.56 - 2.59 (m, 1H), 2.45 - 2.48 (t, 2H), 2.13 - 2.19 (m, 2H), 1.99 - 2.01 (m, 2H), 1.79 - 1.81 (m, 2H), 1.69 - 1.72 (m, 1H), 1.21 - 1.41 (m, 5H);  $^{13}\text{C}$  NMR (101 MHz,  $\text{CDCl}_3$ )  $\delta$  194.8, 165.7, 161.4, 121.6, 99.2, 37.5, 36.9, 31.2, 25.9, 25.7, 23.3, 22.6; HRMS (ESI-TOF)  $m/z$  calcd for  $\text{C}_{14}\text{H}_{19}\text{O}_2$  [ $\text{M} + \text{H}$ ] $^+$  219.1380, found 219.1381.

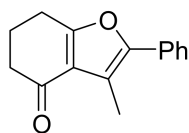

3-Methyl-2-phenyl-6,7-dihydrobenzofuran-4(5H)-one (**3y**):<sup>1</sup> Obtained as a pale yellow liquid (27.1 mg, 60% yield), eluting with 10% EtOAc in PE (elution gradient);  $^1\text{H}$  NMR (400 MHz,  $\text{CDCl}_3$ )  $\delta$  7.63 (d,  $J = 7.6$  Hz, 2H), 7.43 - 7.47 (t, 2H), 7.31 - 7.35 (t, 1H), 2.92 - 2.95 (t, 2H), 2.52 - 2.55 (t, 2H), 2.51 (s, 3H), 2.18 - 2.24 (m, 2H);  $^{13}\text{C}$  NMR (101 MHz,  $\text{CDCl}_3$ )  $\delta$  195.9, 165.9, 148.9, 130.6, 128.6, 127.4, 125.8, 121.9, 114.7, 38.4, 23.6, 22.5, 10.2; HRMS (ESI-TOF)  $m/z$  calcd for  $\text{C}_{15}\text{H}_{15}\text{O}_2$  [ $\text{M} + \text{H}$ ] $^+$  227.1067, found 227.1068.

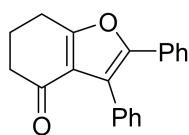

2,3-Diphenyl-6,7-dihydrobenzofuran-4(5H)-one (**3z**): Obtained as a pale yellow liquid (28.2 mg, 49% yield), eluting with 10% EtOAc in PE (elution gradient);  $^1\text{H}$  NMR (400 MHz,  $\text{CDCl}_3$ )  $\delta$  7.26 - 7.35 (m, 7H), 7.15 - 7.18 (t, 3H), 2.91 - 2.94 (t, 2H), 2.42 - 2.45 (t, 2H), 2.12 - 2.18 (m, 2H);  $^{13}\text{C}$  NMR (101 MHz,  $\text{CDCl}_3$ )  $\delta$  193.9, 166.1, 149.0, 131.9, 130.1, 130.0, 128.3, 128.2, 127.8, 127.6, 126.1, 121.3, 119.8, 38.6, 23.8, 22.4; HRMS (ESI-TOF)  $m/z$  calcd for  $\text{C}_{20}\text{H}_{17}\text{O}_2$  [ $\text{M} + \text{H}$ ] $^+$  289.1223, found 289.1222.

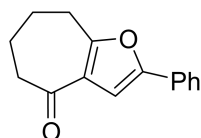

2-Phenyl-5,6,7,8-tetrahydro-4H-cyclohepta[b]furan-4-one (**3aa**):<sup>1</sup>

Obtained as a pale yellow liquid (30.3 mg, 67% yield), eluting with 10% EtOAc in PE (elution gradient); <sup>1</sup>H NMR (400 MHz, CDCl<sub>3</sub>) δ 7.62 - 7.64 (m, 2H), 7.36 - 7.39 (m, 2H), 7.25 - 7.29 (m, 1H), 6.96 (s, 1H), 3.07 - 3.10 (t, 2H), 2.75 - 2.78 (m, 2H), 2.01 - 2.07 (m, 2H), 1.91 - 1.97 (m, 2H); <sup>13</sup>C NMR (101 MHz, CDCl<sub>3</sub>) δ 196.7, 161.2, 152.3, 129.7, 128.7, 127.8, 125.3, 123.7, 105.0, 44.4, 29.7, 24.8, 22.8; HRMS (ESI-TOF) m/z calcd for C<sub>15</sub>H<sub>15</sub>O<sub>2</sub> [M + H]<sup>+</sup> 227.1067, found 227.1069.

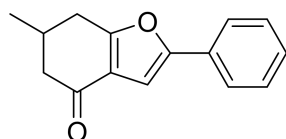

6-Methyl-2-phenyl-6,7-dihydrobenzofuran-4(5H)-one (**3ab**):

Obtained as a pale yellow liquid (36.2 mg, 80% yield), eluting with 10% EtOAc in PE (elution gradient); <sup>1</sup>H NMR (400 MHz, CDCl<sub>3</sub>) δ 7.54 (d, *J* = 7.6 Hz, 2H), 7.26 - 7.30 (t, 2H), 7.17 - 7.20 (t, 1H), 6.77 (s, 1H), 2.88 - 2.94 (t, 2H), 2.43 - 2.52 (t, 2H), 2.12 - 2.19 (t, 2H), 2.28 (d, *J* = 7.2 Hz, 3H); <sup>13</sup>C NMR (101 MHz, CDCl<sub>3</sub>) δ 194.0, 166.3, 154.3, 130.1, 129.7, 128.76, 128.6, 127.9, 127.9, 126.4, 123.8, 122.4, 100.7, 46.0, 31.4, 30.6, 21.0; HRMS (ESI-TOF) m/z calcd for C<sub>15</sub>H<sub>15</sub>O<sub>2</sub> [M + H]<sup>+</sup> 227.1067, found 227.1069.

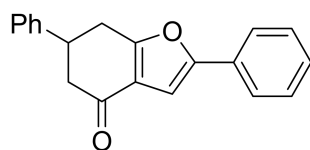

2,6-Diphenyl-6,7-dihydrobenzofuran-4(5H)-one (**3ac**):

Obtained as a pale yellow liquid (49.0 mg, 85% yield), eluting with 10% EtOAc in PE (elution gradient); <sup>1</sup>H NMR (400 MHz, CDCl<sub>3</sub>) δ 7.58 (d, *J* = 7.6 Hz, 2H), 7.27 - 7.33 (m, 4H), 7.19 - 7.22 (t, 4H), 6.84 (s, 1H), 3.47 - 3.55 (t, 1H), 3.14 - 3.19 (q, 1H), 3.00 - 3.07 (q, 1H), 2.71 (d, *J* = 8.4 Hz, 2H); <sup>13</sup>C NMR (101 MHz, CDCl<sub>3</sub>) δ 193.0, 165.7, 154.7, 142.4, 129.7, 128.9, 128.8, 128.2, 127.2, 126.7, 124.0, 122.8, 100.8, 44.9, 41.2, 31.2; HRMS (ESI-TOF) m/z calcd for C<sub>20</sub>H<sub>17</sub>O<sub>2</sub> [M + H]<sup>+</sup> 289.1223, found 289.1224.

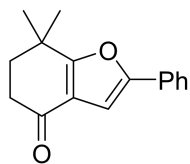

7,7-Dimethyl-2-phenyl-6,7-dihydrobenzofuran-4(5H)-one (**3ad'**):<sup>1</sup>

Obtained as a pale yellow liquid, eluting with 10% EtOAc in PE (elution gradient); <sup>1</sup>H NMR (400 MHz, CDCl<sub>3</sub>) δ 7.66 (d, *J* = 7.6 Hz, 2H), 7.36 - 7.47 (m, 2H), 7.26 - 7.33 (m, 1H), 6.85 (s, 1H), 2.58 - 2.61 (t, 2H), 2.00 - 2.04 (t, 2H), 1.44 (s, 6H); <sup>13</sup>C NMR (101 MHz, CDCl<sub>3</sub>) δ 194.3, 172.4, 154.0, 129.8, 128.7, 128.0, 123.9, 120.6, 100.7, 37.8, 35.3, 32.8, 26.0; HRMS (ESI-TOF) *m/z* calcd for C<sub>16</sub>H<sub>17</sub>O<sub>2</sub> [M + H]<sup>+</sup> 241.1223, found 241.1223.

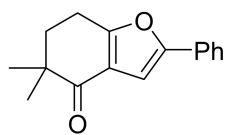

5,5-Dimethyl-2-phenyl-6,7-dihydrobenzofuran-4(5H)-one (**3ad''**):<sup>1</sup>

Obtained as a pale yellow liquid, eluting with 10% EtOAc in PE (elution gradient); <sup>1</sup>H NMR (400 MHz, CDCl<sub>3</sub>) δ 7.68 (d, *J* = 7.2 Hz, 2H), 7.40 - 7.50 (m, 2H), 7.25 - 7.36 (m, 1H), 6.91 (s, 1H), 2.97 - 3.00 (t, 2H), 2.04 - 2.08 (t, 2H), 1.23 (s, 6H); <sup>13</sup>C NMR (101 MHz, CDCl<sub>3</sub>) δ 199.2, 164.7, 154.4, 129.9, 128.7, 127.9, 123.8, 121.2, 101.6, 42.0, 36.4, 24.1, 21.0; HRMS (ESI-TOF) *m/z* calcd for C<sub>16</sub>H<sub>17</sub>O<sub>2</sub> [M + H]<sup>+</sup> 241.1223, found 241.1223.

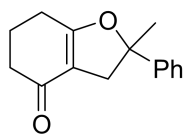

2-Methyl-2-phenyl-3,5,6,7-tetrahydrobenzofuran-4(2H)-one (**4a**):

Obtained as a pale yellow liquid (32.8 mg, 72% yield), eluting with 10% EtOAc in PE (elution gradient); <sup>1</sup>H NMR (400 MHz, CDCl<sub>3</sub>) δ 7.16 - 7.27 (m, 5H), 2.42 - 2.46 (m, 2H), 2.22 - 2.28 (m, 2H), 2.14 - 2.20 (m, 1H), 1.87 - 1.94 (m, 2H), 1.80 - 1.84 (m, 1H), 1.49 (s, 3H); <sup>13</sup>C NMR (101 MHz, CDCl<sub>3</sub>) δ 197.9, 170.2, 144.5, 128.4, 127.1, 124.1, 111.3, 80.5, 36.6, 32.4, 28.9, 28.8, 20.9, 15.7; HRMS (ESI-TOF) *m/z* calcd for C<sub>15</sub>H<sub>17</sub>O<sub>2</sub> [M + H]<sup>+</sup> 229.1223, found 229.1221.

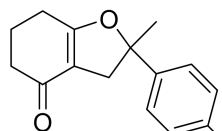

Ph 2-([1,1'-Biphenyl]-4-yl)-2-methyl-3,5,6,7-tetrahydrobenzofuran-4

(2H)-one (**4b**): Obtained as a pale yellow liquid (45.6 mg, 75% yield), eluting with 10% EtOAc in PE (elution gradient);  $^1\text{H NMR}$  (400 MHz,  $\text{CDCl}_3$ )  $\delta$  7.57 - 7.60 (m, 4H), 7.42 - 7.46 (m, 4H), 7.33 - 7.37 (t, 1H), 3.14 (d,  $J = 14.4$  Hz, 1H), 3.03 (d,  $J = 14.0$  Hz, 1H), 2.53 - 2.56 (t, 2H), 2.36 - 2.40 (m, 2H), 2.05 - 2.12 (t, 2H), 1.76 (s, 3H);  $^{13}\text{C NMR}$  (101 MHz,  $\text{CDCl}_3$ )  $\delta$  195.7, 175.9, 144.5, 140.5, 140.4, 128.8, 127.4, 127.2, 127.0, 124.7, 92.5, 40.5, 36.4, 29.7, 24.1, 21.7; HRMS (ESI-TOF)  $m/z$  calcd for  $\text{C}_{21}\text{H}_{21}\text{O}_2$   $[\text{M} + \text{H}]^+$  305.1536, found 305.1535.

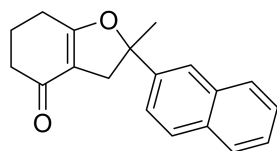

2-Methyl-2-(naphthalen-2-yl)-3,5,6,7-tetrahydrobenzofuran-4(2

H)-one (**4c**): Obtained as a pale yellow liquid (40.6 mg, 73% yield), eluting with 20% EtOAc in PE (elution gradient);  $^1\text{H NMR}$  (400 MHz,  $\text{CDCl}_3$ )  $\delta$  7.81 - 7.86 (m, 4H), 7.43 - 7.52 (m, 3H), 3.20 (d,  $J = 14.4$  Hz, 1H), 3.07 (d,  $J = 14.4$  Hz, 1H), 2.56 - 2.59 (m, 2H), 2.36 - 2.41 (m, 2H), 2.08 - 2.13 (m, 2H), 1.81 (s, 3H);  $^{13}\text{C NMR}$  (101 MHz,  $\text{CDCl}_3$ )  $\delta$  203.5, 183.3, 141.1, 133.0, 132.4, 128.4, 128.0, 127.4, 126.2, 126.1, 123.0, 122.4, 114.6, 83.6, 33.2, 32.1, 28.3, 26.6, 14.7; HRMS (ESI-TOF)  $m/z$  calcd for  $\text{C}_{19}\text{H}_{19}\text{O}_2$   $[\text{M} + \text{H}]^+$  279.1380, found 279.1381.

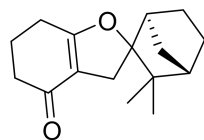

3',3'-Dimethyl-3,5,6,7-tetrahydro-4H-spiro[benzofuran-2,2'-bicyclo[2.

2.1]heptan]-4-one (**4d**): Obtained as a pale yellow liquid (20.7 mg, 42% yield), eluting with 10% EtOAc in PE (elution gradient);  $^1\text{H NMR}$  (400 MHz,  $\text{CDCl}_3$ )  $\delta$  2.26 - 2.28 (m, 5H), 2.08 (d,  $J = 4.0$  Hz, 1H), 1.84 - 1.97 (m, 5H), 1.73 (s, 1H), 1.43 - 1.54 (m, 2H), 1.30 - 1.38 (m, 1H), 1.04 (d,  $J = 9.2$  Hz, 1H), 0.95 (s, 3H), 0.88 (s, 3H);  $^{13}\text{C NMR}$  (101 MHz,  $\text{CDCl}_3$ )  $\delta$  198.2, 171.2, 111.0, 89.1, 49.5, 45.3, 44.3, 36.7, 34.3,



28.9, 25.1, 23.6, 23.2, 22.4, 22.1, 21.0, 16.6; HRMS (ESI-TOF)  $m/z$  calcd for  $C_{16}H_{23}O_2$   $[M + H]^+$  247.1693, found 247.1692.

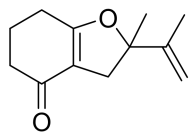

2-Methyl-2-(prop-1-en-2-yl)-3,5,6,7-tetrahydrobenzofuran-4(2H)-one

**(4e)**: Obtained as a pale yellow liquid (28.0 mg, 73% yield), eluting with 10% EtOAc in PE (elution gradient);  $^1H$  NMR (400 MHz,  $CDCl_3$ )  $\delta$  4.96 (s, 1H), 4.80 - 4.81 (t, 1H), 2.79 - 2.83 (m, 1H), 2.58 - 2.62 (m, 1H), 2.40 - 2.44 (t, 2H), 2.30 - 2.34 (m, 2H), 1.99 - 2.05 (m, 2H), 1.74 (d,  $J = 0.4$  Hz, 3H), 1.47 (s, 3H);  $^{13}C$  NMR (101 MHz,  $CDCl_3$ )  $\delta$  195.6, 176.0, 146.4, 112.4, 110.0, 93.2, 37.3, 36.2, 26.0, 23.9, 21.6, 18.3.; HRMS (ESI-TOF)  $m/z$  calcd for  $C_{12}H_{17}O_2$   $[M + H]^+$  193.1223, found 193.1224.

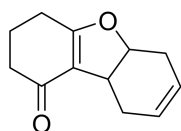

3,4,5a,6,9,9a-Hexahydrodibenzo[b,d]furan-1(2H)-one (**4f**):

Obtained as a pale yellow liquid (23.6 mg, 62% yield), eluting with 10% EtOAc in PE (elution gradient);  $^1H$  NMR (400 MHz,  $CDCl_3$ )  $\delta$  5.97 - 6.01 (m, 1H), 5.77 - 5.80 (m, 1H), 4.78 - 4.79 (m, 1H), 3.05 (s, 1H), 2.31 - 2.42 (m, 4H), 2.27 - 2.29 (m, 1H), 2.14 - 2.20 (m, 1H), 1.92 - 1.98 (m, 2H), 1.77 - 1.78 (t, 2H);  $^{13}C$  NMR (101 MHz,  $CDCl_3$ )  $\delta$  197.4, 169.4, 133.5, 123.4, 115.6, 68.6, 36.8, 32.2, 28.4, 27.2, 22.0, 20.8; HRMS (ESI-TOF)  $m/z$  calcd for  $C_{12}H_{15}O_2$   $[M + H]^+$  191.1067, found 191.1066.

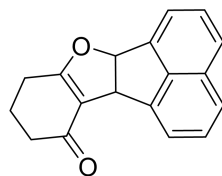

8,9,10,11b-Tetrahydroacenaphtho[1,2-b]benzofuran-11(6bH)-one

**(4g)**: Obtained as a pale yellow liquid (29.9 mg, 57% yield), eluting with 10% EtOAc in PE (elution gradient);  $^1H$  NMR (400 MHz,  $CDCl_3$ )  $\delta$  7.65 - 7.71 (dd,  $J = 8.0, 7.2$  Hz, 2H), 7.56 (d,  $J = 8.0$  Hz, 1H), 7.52 (d,  $J = 7.2$  Hz, 1H), 7.46 (d,  $J = 8.0$  Hz, 1H), 7.39 - 7.44 (m, 1H), 6.43 (d,  $J = 8.0$  Hz, 1H), 5.04 (d,  $J = 8.0$  Hz, 1H), 2.13 - 2.38 (m, 4H), 1.86 - 1.94 (m, 1H), 1.75 - 1.83 (m, 1H);  $^{13}C$  NMR (101 MHz,  $CDCl_3$ )  $\delta$  195.0,

177.3, 143.6, 140.1, 137.1, 131.5, 128.7, 127.7, 126.1, 123.1, 121.8, 121.7, 115.3, 90.8, 49.5, 36.6, 24.0, 21.4; HRMS (ESI-TOF)  $m/z$  calcd for  $C_{18}H_{15}O_2$   $[M + H]^+$  263.1067, found 263.1066.

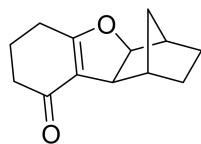

2,3,4,4a,6,7,8,9b-Octahydro-1,4-methanodibenzo[b,d]furan-9(1H)-one

(**4h**): Obtained as a pale yellow liquid (26.9 mg, 66% yield), eluting with 10% EtOAc in PE (elution gradient);  $^1H$  NMR (400 MHz,  $CDCl_3$ )  $\delta$  4.56 (d,  $J = 7.6$  Hz, 1H), 2.93 (d,  $J = 7.2$  Hz, 1H), 2.37 - 2.40 (m, 1H), 2.30 - 2.35 (m, 2H), 2.22 - 2.25 (t, 2H), 1.91 - 1.96 (m, 2H), 1.39 - 1.49 (m, 2H), 1.34 (d,  $J = 8.8$  Hz, 1H), 1.18 - 1.26 (m, 3H), 1.05 - 1.10 (m, 1H);  $^{13}C$  NMR (101 MHz,  $CDCl_3$ )  $\delta$   $^{13}C$  NMR (101 MHz,  $CDCl_3$ )  $\delta$  195.4, 179.4, 115.2, 91.7, 48.5, 42.0, 39.0, 36.5, 31.6, 27.3, 23.6, 23.2, 21.6; HRMS (ESI-TOF)  $m/z$  calcd for  $C_{13}H_{17}O_2$   $[M + H]^+$  205.1223, found 205.1225.

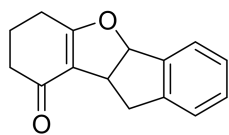

4b,6,7,8,9b,10-Hexahydro-9H-indeno[1,2-b]benzofuran-9-one (**4i**):

Obtained as a pale yellow liquid (24.2 mg, 53% yield), eluting with 10% EtOAc in PE (elution gradient);  $^1H$  NMR (400 MHz,  $CDCl_3$ )  $\delta$  7.41 (d,  $J = 7.2$  Hz, 1H), 7.19 - 7.28 (m, 3H), 6.12 (d,  $J = 8.4$  Hz, 1H), 3.93 - 3.97 (t, 1H), 3.25 - 3.31 (m, 1H), 3.10 (d,  $J = 16.8$  Hz, 1H), 2.18 - 2.38 (m, 4H), 1.85 - 1.97 (m, 2H);  $^{13}C$  NMR (101 MHz,  $CDCl_3$ )  $\delta$  195.6, 176.5, 143.4, 139.4, 129.8, 127.0, 125.8, 125.6, 116.8, 93.3, 41.8, 37.5, 36.7, 24.0, 21.6; HRMS (ESI-TOF)  $m/z$  calcd for  $C_{15}H_{15}O_2$   $[M + H]^+$  229.1223, found 229.1221.

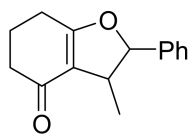

3-Methyl-2-phenyl-3,5,6,7-tetrahydrobenzofuran-4(2H)-one (**4j**):

Obtained as a pale yellow liquid (14.6 mg, 32% yield), eluting with 10% EtOAc in PE (elution gradient);  $^1H$  NMR (400 MHz,  $CDCl_3$ )  $\delta$  7.34 - 7.41 (m, 3H), 7.26 - 7.32 (m, 2H), 5.16 (d,  $J = 6.8$  Hz, 1H), 3.26 - 3.31 (m, 1H), 2.51 - 2.54 (t, 2H), 2.35 - 2.41 (m,

2H), 2.07 - 2.12 (m, 2H), 1.39 (d,  $J = 6.8$  Hz, 3H);  $^{13}\text{C}$  NMR (101 MHz,  $\text{CDCl}_3$ )  $\delta$  195.7, 176.5, 140.2, 128.7, 128.5, 125.6, 117.37, 93.7, 43.0, 37.0, 24.0, 21.9, 19.4; HRMS (ESI-TOF)  $m/z$  calcd for  $\text{C}_{15}\text{H}_{17}\text{O}_2$   $[\text{M} + \text{H}]^+ 229.1223$ , found 229.1222.

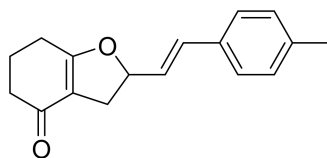

(*E*)-2-(4-Methylstyryl)-3,5,6,7-tetrahydrobenzofuran-4(2H)-

one (**4k**): Obtained as a pale yellow liquid (28.4 mg, 56% yield), eluting with 10% EtOAc in PE (elution gradient);  $^1\text{H}$  NMR (400 MHz,  $\text{CDCl}_3$ )  $\delta$  7.30 (d,  $J = 8.0$  Hz, 2H), 7.14 (d,  $J = 7.6$  Hz, 2H), 6.63 (d,  $J = 15.6$  Hz, 1H), 6.18 - 6.24 (q, 1H), 5.34 - 5.41 (m, 1H), 3.05 - 3.12 (m, 1H), 2.68 - 2.74 (t, 1H), 2.45 - 2.48 (t, 2H), 2.36 - 2.39 (t, 2H), 2.34 (s, 3H), 2.03 - 2.09 (m, 2H);  $^{13}\text{C}$  NMR (101 MHz,  $\text{CDCl}_3$ )  $\delta$  195.5, 177.1, 138.3, 133.2, 132.9, 129.3, 126.6, 126.0, 113.1, 86.2, 36.4, 32.1, 24.0, 21.7, 21.2; HRMS (ESI-TOF)  $m/z$  calcd for  $\text{C}_{17}\text{H}_{19}\text{O}_2$   $[\text{M} + \text{H}]^+ 255.1380$ , found 255.1379.

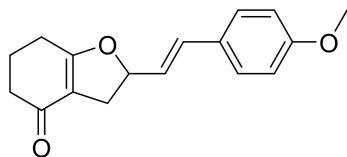

(*E*)-2-(4-Methoxystyryl)-3,5,6,7-tetrahydrobenzofuran-4(2

H)-one (**4l**): Obtained as a pale yellow liquid (27.5 mg, 51% yield), eluting with 10% EtOAc in PE (elution gradient);  $^1\text{H}$  NMR (400 MHz,  $\text{CDCl}_3$ )  $\delta$  7.26 (d,  $J = 7.6$  Hz, 1H), 7.00 (d,  $J = 7.6$  Hz, 1H), 6.93 - 6.95 (m, 1H), 6.82 - 6.86 (m, 1H), 6.93 (d,  $J = 16.0$  Hz, 1H), 6.23 - 6.29 (q, 1H), 5.35 - 5.41 (m, 1H), 3.82 (s, 3H), 3.06 - 3.12 (m, 1H), 2.69 - 2.74 (m, 1H), 2.46 - 2.49 (t, 2H), 2.36 - 2.39 (t, 2H), 2.03 - 2.09 (m, 2H);  $^{13}\text{C}$  NMR (101 MHz,  $\text{CDCl}_3$ )  $\delta$  195.5, 177.1, 159.7, 137.2, 132.9, 129.6, 127.3, 119.4, 114.0, 113.0, 111.9, 85.9, 55.2, 36.4, 32.1, 24.0, 21.6; HRMS (ESI-TOF)  $m/z$  calcd for  $\text{C}_{17}\text{H}_{19}\text{O}_3$   $[\text{M} + \text{H}]^+ 271.1329$ , found 271.1325.

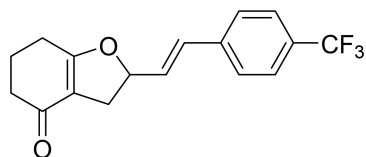

(*E*)-2-(4-(Trifluoromethyl)styryl)-3,5,6,7-tetrahydrobenzo

furan-4(2H)-one (**4m**): Obtained as a pale yellow liquid (28.3 mg, 46% yield), eluting with 10% EtOAc in PE (elution gradient);  $^1\text{H}$  NMR (400 MHz,  $\text{CDCl}_3$ )  $\delta$  7.59 (d,  $J = 8.0$  Hz, 2H), 7.50 (d,  $J = 8.0$  Hz, 2H), 6.69 (d,  $J = 16.0$  Hz, 1H), 6.33 - 6.39 (q, 1H), 5.38 - 5.44 (m, 1H), 3.09 - 3.15 (m, 1H), 2.70 - 2.75 (t, 1H), 2.47 - 2.50 (t, 2H), 2.37 - 2.40 (t, 2H), 2.05 - 2.11 (m, 2H);  $^{13}\text{C}$  NMR (101 MHz,  $\text{CDCl}_3$ )  $\delta$  195.5, 177.0, 139.3, 131.3, 130.2, 129.8, 126.9, 125.63 (q,  $J = 3.8, 7.6$  Hz), 125.4, 113.0, 85.3, 36.5, 32.2, 24.0, 21.7;  $^{19}\text{F}$  NMR (400 MHz,  $\text{CDCl}_3$ )  $\delta$  -62.6; HRMS (ESI-TOF)  $m/z$  calcd for  $\text{C}_{17}\text{H}_{16}\text{F}_3\text{O}_2$   $[\text{M} + \text{H}]^+$  309.1097, found 309.1096.

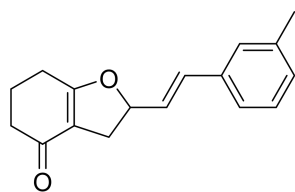

(*E*)-2-(3-Methylstyryl)-3,5,6,7-tetrahydrobenzofuran-4(2H)-on

e (**4n**): Obtained as a pale yellow liquid (31.5 mg, 62% yield), eluting with 10% EtOAc in PE (elution gradient);  $^1\text{H}$  NMR (400 MHz,  $\text{CDCl}_3$ )  $\delta$  7.19 - 7.26 (m, 3H), 7.07 - 7.10 (m, 1H), 6.62 (d,  $J = 15.6$  Hz, 1H), 6.22 - 6.28 (q, 1H), 5.34 - 5.41 (m, 1H), 3.06 - 3.12 (m, 1H), 2.68 - 2.74 (m, 1H), 2.45 - 2.48 (t, 2H), 2.35 - 2.39 (t, 2H), 2.34 (s, 3H), 2.02 - 2.09 (m, 2H);  $^{13}\text{C}$  NMR (101 MHz,  $\text{CDCl}_3$ )  $\delta$  195.5, 177.1, 138.2, 135.6, 133.2, 129.1, 128.5, 127.3, 126.8, 123.9, 113.0, 86.0, 36.4, 32.1, 29.6, 23.9, 21.6, 21.3; HRMS (ESI-TOF)  $m/z$  calcd for  $\text{C}_{17}\text{H}_{19}\text{O}_2$   $[\text{M} + \text{H}]^+$  255.1380, found 255.1381.

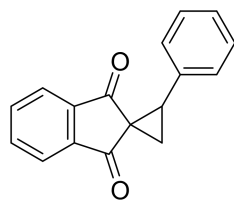

2-Phenylspiro[cyclopropane-1,2'-indene]-1',3'-dione (**5a**): Obtained as a pale yellow liquid (37.7 mg, 76% yield), eluting with 5% EtOAc in PE (elution gradient);  $^1\text{H}$  NMR (400 MHz,  $\text{CDCl}_3$ )  $\delta$  7.97 (d,  $J = 6.8$  Hz, 1H), 7.73 - 7.82 (m, 3H),

7.25 - 7.33 (m, 5H), 3.43 - 3.48 (t, 1H), 2.47 - 2.50 (q, 1H), 2.29 - 2.32 (q, 1H);  $^{13}\text{C}$  NMR (101 MHz,  $\text{CDCl}_3$ )  $\delta$  198.2, 195.8, 142.6, 141.5, 134.8, 134.6, 133.5, 129.2, 128.1, 127.8, 122.5, 122.4, 42.6, 41.2, 22.2; HRMS (ESI-TOF)  $m/z$  calcd for  $\text{C}_{17}\text{H}_{13}\text{O}_2$   $[\text{M} + \text{H}]^+$  249.0910, found 249.0911.

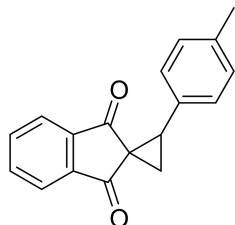

2-(*p*-Tolyl)spiro[cyclopropane-1,2'-indene]-1',3'-dione (**5b**):

Obtained as a pale yellow liquid (44.0 mg, 84% yield), eluting with 5% EtOAc in PE (elution gradient);  $^1\text{H}$  NMR (400 MHz,  $\text{CDCl}_3$ )  $\delta$  7.96 (d,  $J = 7.2$  Hz, 1H), 7.71 - 7.81 (m, 3H), 7.18 (d,  $J = 8.0$  Hz, 2H), 7.10 (d,  $J = 8.0$  Hz, 2H), 3.41 - 3.45 (t, 1H), 2.45 - 2.48 (q, 1H), 2.27 - 2.31 (m, 4H);  $^{13}\text{C}$  NMR (101 MHz,  $\text{CDCl}_3$ )  $\delta$  198.2, 195.9, 142.6, 141.5, 137.5, 134.7, 134.5, 130.4, 129.0, 128.8, 122.39, 122.35, 42.8, 41.3, 22.2, 21.2; HRMS (ESI-TOF)  $m/z$  calcd for  $\text{C}_{18}\text{H}_{15}\text{O}_2$   $[\text{M} + \text{H}]^+$  263.1067, found 263.1068.

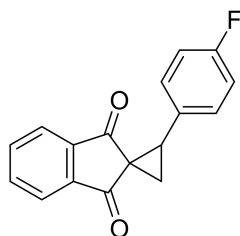

2-(4-Fluorophenyl)spiro[cyclopropane-1,2'-indene]-1',3'-dione (**5c**):

Obtained as a pale yellow liquid (38.3 mg, 72% yield), eluting with 5% EtOAc in PE (elution gradient);  $^1\text{H}$  NMR (400 MHz,  $\text{CDCl}_3$ )  $\delta$  7.97 (d,  $J = 6.8$  Hz, 1H), 7.74 - 7.82 (m, 3H), 7.25 - 7.28 (t, 2H), 6.96 - 7.00 (t, 2H), 3.39 - 3.43 (t, 1H), 2.41 - 2.44 (q, 1H), 2.28 - 2.32 (q, 1H);  $^{13}\text{C}$  NMR (101 MHz,  $\text{CDCl}_3$ )  $\delta$  197.9, 195.8, 162.2 (d,  $J = 245.3$  Hz), 142.6, 141.6, 134.9, 134.7, 130.8, 130.7, 129.3 (d,  $J = 3.2$  Hz), 122.5 (d,  $J = 1.5$  Hz), 115.1 (d,  $J = 21.5$  Hz), 42.5, 40.1, 22.3;  $^{19}\text{F}$  NMR (400 MHz,  $\text{CDCl}_3$ )  $\delta$  -114.1; HRMS (ESI-TOF)  $m/z$  calcd for  $\text{C}_{17}\text{H}_{12}\text{FO}_2$   $[\text{M} + \text{H}]^+$  267.0816, found 267.0815.

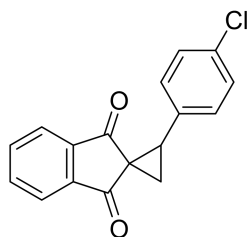

2-(4-Chlorophenyl)spiro[cyclopropane-1,2'-indene]-1',3'-dione (**5d**): Obtained as a pale yellow liquid (41.7 mg, 74% yield), eluting with 5% EtOAc in PE (elution gradient);  $^1\text{H}$  NMR (400 MHz,  $\text{CDCl}_3$ )  $\delta$  7.97 (d,  $J = 6.8$  Hz, 1H), 7.74 - 7.82 (m, 3H), 7.21 - 7.27 (m, 4H), 3.36 - 3.41 (t, 1H), 2.40 - 2.43 (q, 1H), 2.28 - 2.31 (q, 1H);  $^{13}\text{C}$  NMR (101 MHz,  $\text{CDCl}_3$ )  $\delta$  197.8, 195.7, 142.5, 141.5, 134.9, 134.7, 133.6, 132.1, 130.5, 128.3, 122.49, 122.48, 42.4, 40.0, 22.1; HRMS (ESI-TOF)  $m/z$  calcd for  $\text{C}_{17}\text{H}_{12}\text{ClO}_2$   $[\text{M} + \text{H}]^+$  283.0520, found 283.0522.

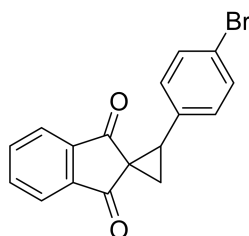

2-(4-Bromophenyl)spiro[cyclopropane-1,2'-indene]-1',3'-dione (**5e**): Obtained as a pale yellow liquid (45.6 mg, 70% yield), eluting with 5% EtOAc in PE (elution gradient);  $^1\text{H}$  NMR (400 MHz,  $\text{CDCl}_3$ )  $\delta$  8.16 (d,  $J = 7.6$  Hz, 2H), 8.00 (d,  $J = 7.2$  Hz, 1H), 7.78 - 7.83 (m, 3H), 7.48 (d,  $J = 8.0$  Hz, 2H), 3.44 - 3.48 (t, 1H), 2.47 - 2.50 (q, 1H), 2.34 - 2.38 (q, 1H);  $^{13}\text{C}$  NMR (101 MHz,  $\text{CDCl}_3$ )  $\delta$  197.2, 195.4, 147.2, 142.4, 141.5, 141.2, 135.2, 135.1, 130.1, 123.2, 122.7, 122.6, 42.2, 38.8, 22.1; HRMS (ESI-TOF)  $m/z$  calcd for  $\text{C}_{17}\text{H}_{12}\text{BrO}_2$   $[\text{M} + \text{H}]^+$  327.0015, found 327.0012.

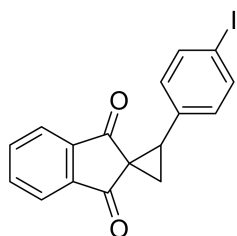

2-(4-Iodophenyl)spiro[cyclopropane-1,2'-indene]-1',3'-dione (**5f**): Obtained as a pale yellow liquid (57.4 mg, 77% yield), eluting with 5% EtOAc in PE (elution gradient);  $^1\text{H}$  NMR (400 MHz,  $\text{CDCl}_3$ )  $\delta$  7.97 (d,  $J = 6.8$  Hz, 1H), 7.74 - 7.83 (m, 3H), 7.42 (d,  $J = 8.0$  Hz, 2H), 7.17 (d,  $J = 8.0$  Hz, 2H), 3.35 - 3.39 (t, 1H), 2.40 - 2.43 (q, 1H), 2.28 - 2.31 (q, 1H);  $^{13}\text{C}$  NMR (101 MHz,  $\text{CDCl}_3$ )  $\delta$  197.8, 195.7, 142.6,

141.5, 135.0, 134.8, 132.6, 131.2, 130.8, 122.5, 121.8, 42.4, 40.0, 22.1; HRMS (ESI-TOF)  $m/z$  calcd for  $C_{17}H_{12}IO_2$   $[M + H]^+$  374.9876, found 374.9878.

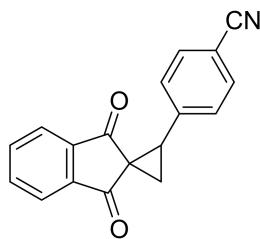

4-(1',3'-Dioxo-1',3'-dihydrospiro[cyclopropane-1,2'-inden]-2-yl)benzonitrile (**5g**): Obtained as a pale yellow liquid (38.8 mg, 71% yield), eluting with 5% EtOAc in PE (elution gradient);  $^1H$  NMR (400 MHz,  $CDCl_3$ )  $\delta$  7.99 (d,  $J = 7.2$  Hz, 1H), 7.79 - 7.84 (m, 3H), 7.60 (d,  $J = 8.0$  Hz, 1H), 7.42 (d,  $J = 8.0$  Hz, 1H), 3.40 - 3.44 (t, 1H), 2.43 - 2.46 (q, 1H), 2.31 - 2.35 (q, 1H);  $^{13}C$  NMR (101 MHz,  $CDCl_3$ )  $\delta$  197.3, 195.5, 142.4, 141.5, 139.1, 135.2, 135.0, 131.8, 129.9, 122.7, 122.6, 118.6, 111.5, 42.2, 39.3, 22.0; HRMS (ESI-TOF)  $m/z$  calcd for  $C_{18}H_{12}NO_2$   $[M + H]^+$  274.0863, found 274.0861.

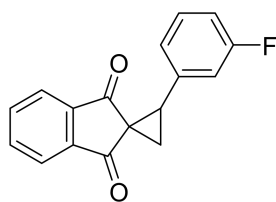

2-(3-Fluorophenyl)spiro[cyclopropane-1,2'-indene]-1',3'-dione (**5h**): Obtained as a pale yellow liquid (34.6 mg, 65% yield), eluting with 5% EtOAc in PE (elution gradient);  $^1H$  NMR (400 MHz,  $CDCl_3$ )  $\delta$  7.98 (d,  $J = 6.8$  Hz, 1H), 7.75 - 7.84 (m, 3H), 7.23 - 7.28 (q, 1H), 7.07 (d,  $J = 7.6$  Hz, 1H), 7.01 (d,  $J = 10.0$  Hz, 1H), 6.93 - 6.97 (t, 1H), 3.38 - 3.43 (t, 1H), 2.41 - 2.44 (q, 1H), 2.27 - 2.30 (q, 1H);  $^{13}C$  NMR (101 MHz,  $CDCl_3$ )  $\delta$  197.9, 195.8, 162.2 (d,  $J = 245.3$  Hz), 142.6, 141.6, 134.9, 134.7, 130.8, 130.7, 129.3 (d,  $J = 3.2$  Hz), 122.5 (d,  $J = 1.5$  Hz), 115.1 (d,  $J = 21.5$  Hz), 42.5, 40.1, 22.3;  $^{19}F$  NMR (400 MHz,  $CDCl_3$ )  $\delta$  -113.3; HRMS (ESI-TOF)  $m/z$  calcd for  $C_{17}H_{12}FO_2$   $[M + H]^+$  267.0816, found 267.0817.

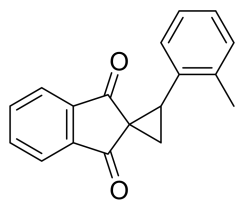

2-(*o*-Tolyl)spiro[cyclopropane-1,2'-indene]-1',3'-dione (**5i**):

Obtained as a pale yellow liquid (41.4 mg, 79% yield), eluting with 5% EtOAc in PE (elution gradient);  $^1\text{H}$  NMR (400 MHz,  $\text{CDCl}_3$ )  $\delta$  7.99 (d,  $J = 7.2$  Hz, 1H), 7.73 - 7.81 (m, 3H), 7.35 (d,  $J = 7.2$  Hz, 1H), 7.18 - 7.26 (m, 2H), 7.07 (d,  $J = 6.8$  Hz, 1H), 3.31 - 3.35 (t, 1H), 2.47 - 2.50 (q, 1H), 2.29 - 2.32 (q, 1H), 1.94 (s, 3H);  $^{13}\text{C}$  NMR (101 MHz,  $\text{CDCl}_3$ )  $\delta$  198.5, 195.5, 142.2, 141.3, 137.8, 134.9, 134.6, 132.6, 129.7, 128.8, 127.9, 125.7, 122.4, 41.8, 39.4, 22.4, 19.5; HRMS (ESI-TOF)  $m/z$  calcd for  $\text{C}_{18}\text{H}_{15}\text{O}_2$   $[\text{M} + \text{H}]^+$  263.1067, found 263.1065.

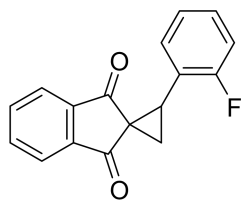

2-(2-Fluorophenyl)spiro[cyclopropane-1,2'-indene]-1',3'-dione (**5j**):

Obtained as a pale yellow liquid (37.2 mg, 70% yield), eluting with 5% EtOAc in PE (elution gradient);  $^1\text{H}$  NMR (400 MHz,  $\text{CDCl}_3$ )  $\delta$  7.99 (d,  $J = 6.8$  Hz, 1H), 7.74 - 7.84 (m, 3H), 7.36 - 7.40 (t, 1H), 7.24 - 7.29 (q, 1H), 7.13 - 7.17 (t, 1H), 6.91 - 6.96 (t, 1H), 3.34 - 3.37 (t, 1H), 2.34 - 2.37 (q, 1H), 2.27 - 2.30 (m, 1H);  $^{13}\text{C}$  NMR (101 MHz,  $\text{CDCl}_3$ )  $\delta$  198.0, 195.8, 161.9 (d,  $J = 245.9$  Hz), 142.4, 141.6, 134.8, 134.6, 130.5 (d,  $J = 3.2$  Hz), 129.6, 129.5, 123.8 (d,  $J = 3.6$  Hz), 122.5 (d,  $J = 7.7$  Hz), 121.7 (d,  $J = 14.5$  Hz), 114.9 (d,  $J = 21.1$  Hz), 40.9, 33.6 (d,  $J = 3.4$  Hz), 21.5;  $^{19}\text{F}$  NMR (400 MHz,  $\text{CDCl}_3$ )  $\delta$  -115.7; HRMS (ESI-TOF)  $m/z$  calcd for  $\text{C}_{17}\text{H}_{12}\text{FO}_2$   $[\text{M} + \text{H}]^+$  267.0816, found 267.0813.

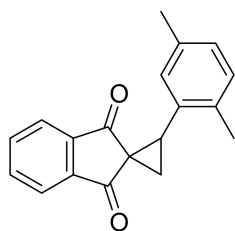

2-(2,5-Dimethylphenyl)spiro[cyclopropane-1,2'-indene]-1',3'-dione

(**5k**): Obtained as a pale yellow liquid (48.6 mg, 88% yield), eluting with 5% EtOAc in PE (elution gradient);  $^1\text{H}$  NMR (400 MHz,  $\text{CDCl}_3$ )  $\delta$  7.98 (d,  $J = 6.8$  Hz, 1H), 7.73



- 7.81 (m, 3H), 7.16 (s, 1H), 7.01 (d,  $J = 7.6$  Hz, 1H), 6.95 (d,  $J = 7.6$  Hz, 1H), 3.28 - 3.32 (t, 1H), 2.46 - 2.49 (q, 1H), 2.36 (s, 3H), 2.27 - 2.30 (q, 1H), 1.88 (s, 3H);  $^{13}\text{C}$  NMR (101 MHz,  $\text{CDCl}_3$ )  $\delta$  198.5, 195.5, 142.2, 141.3, 135.1, 134.8, 134.7, 134.6, 132.3, 129.6, 128.7, 122.39, 122.35, 41.9, 39.6, 22.4, 21.1, 19.0; HRMS (ESI-TOF)  $m/z$  calcd for  $\text{C}_{19}\text{H}_{17}\text{O}_2$   $[\text{M} + \text{H}]^+$  277.1223, found 277.1225.

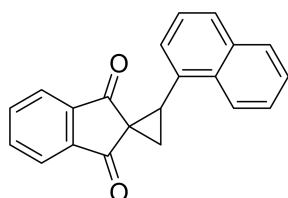

2-(Naphthalen-1-yl)spiro[cyclopropane-1,2'-indene]-1',3'-dione (**5l**): Obtained as a pale yellow liquid (42.3 mg, 71% yield), eluting with 5% EtOAc in PE (elution gradient);  $^1\text{H}$  NMR (400 MHz,  $\text{CDCl}_3$ )  $\delta$  8.03 (d,  $J = 7.6$  Hz, 1H), 7.74 - 7.80 (m, 3H), 7.65 - 7.69 (t, 1H), 7.61 (d,  $J = 7.2$  Hz, 1H), 7.55 - 7.57 (m, 2H), 7.47 - 7.51 (t, 1H), 7.33 - 7.36 (m, 1H), 7.19 - 7.23 (t, 1H), 3.77 - 3.81 (t, 1H), 2.60 - 2.64 (q, 1H), 2.41 - 2.44 (q, 1H);  $^{13}\text{C}$  NMR (101 MHz,  $\text{CDCl}_3$ )  $\delta$  198.7, 195.2, 142.3, 141.4, 134.9, 134.5, 133.3, 132.8, 130.1, 128.8, 128.7, 126.8, 126.4, 125.6, 125.1, 122.6, 122.4, 122.4, 42.1, 38.2, 22.2; HRMS (ESI-TOF)  $m/z$  calcd for  $\text{C}_{21}\text{H}_{15}\text{O}_2$   $[\text{M} + \text{H}]^+$  299.1067, found 299.1065.

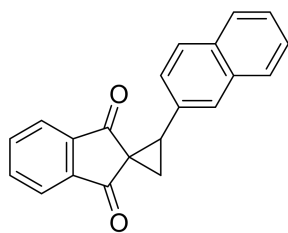

2-(Naphthalen-2-yl)spiro[cyclopropane-1,2'-indene]-1',3'-dione (**5m**): Obtained as a pale yellow liquid (48.3 mg, 81% yield), eluting with 5% EtOAc in PE (elution gradient);  $^1\text{H}$  NMR (400 MHz,  $\text{CDCl}_3$ )  $\delta$  7.98 (d,  $J = 7.2$  Hz, 1H), 7.69 - 7.78 (m, 7H), 7.43 - 7.44 (m, 2H), 7.36 (d,  $J = 8.4$  Hz, 1H), 3.58 - 3.62 (t, 1H), 2.60 - 2.63 (q, 1H), 2.36 - 2.39 (q, 1H);  $^{13}\text{C}$  NMR (101 MHz,  $\text{CDCl}_3$ )  $\delta$  198.1, 195.7, 142.6, 141.6, 134.8, 134.6, 133.0, 132.8, 131.1, 128.4, 127.8, 127.6, 126.8, 126.1, 126.0, 122.4, 42.8, 41.4, 22.3; HRMS (ESI-TOF)  $m/z$  calcd for  $\text{C}_{21}\text{H}_{15}\text{O}_2$   $[\text{M} + \text{H}]^+$  299.1067, found 299.1068.

## References

1. (a) A. Shao, X. Luo, C.-W. Chiang, M. Gao and A. Lei, *Chem. Eur. J.* **2017**, *23*, 17874-17878; (b) L. Xia and Y. R. Lee, *Eur. J. Org. Chem.* **2014**, 3430-3442; (c) L. Xia and Y. R. Lee, *Adv. Synth. Catal.* **2013**, *355*, 2361-2374; (d) Y.-Y. Han, Y.-Y. Jiao, D. Ren, Z. Hu, S. Shen and S. Yu, *Asian J. Org. Chem.* **2017**, *6*, 414-417; (e) S. Agasti, T. Pal, T. K. Achar, S. Maiti, D. Pal, S. Mandal, K. Daud, G. K. Lahiri and D. Maiti, *Angew. Chem. Int. Ed.* **2019**, *58*, 1-6.

# Copies of $^1\text{H}$ and $^{13}\text{C}$ NMR spectra of products

## $^1\text{H}$ NMR and $^{13}\text{C}$ NMR of 3a

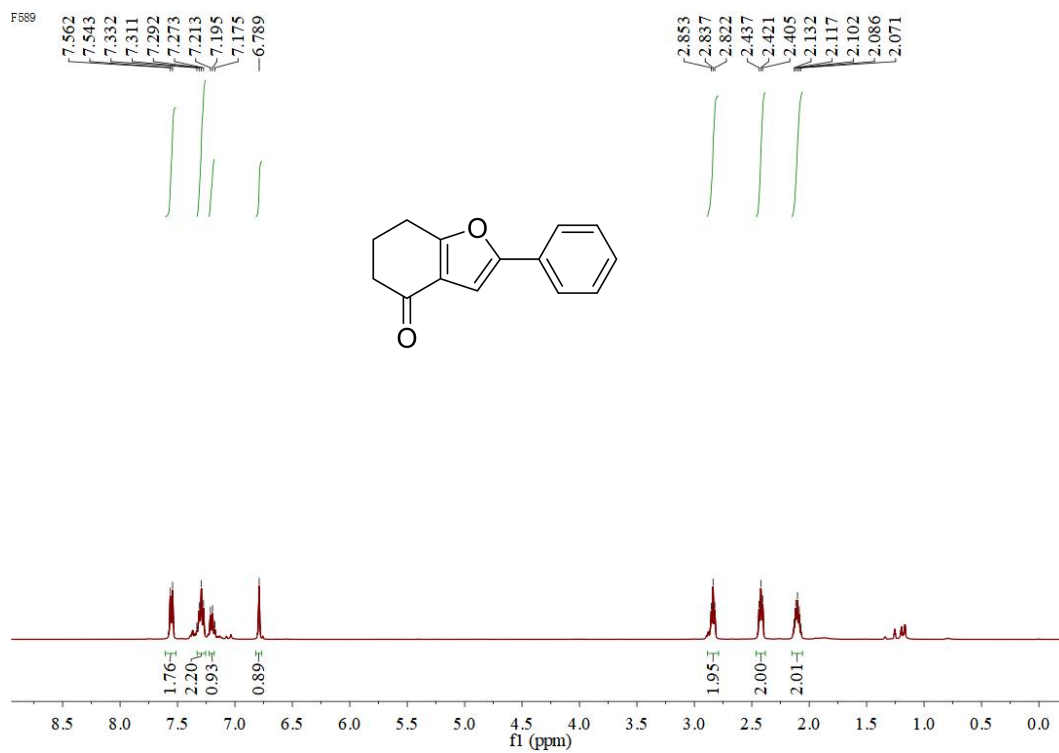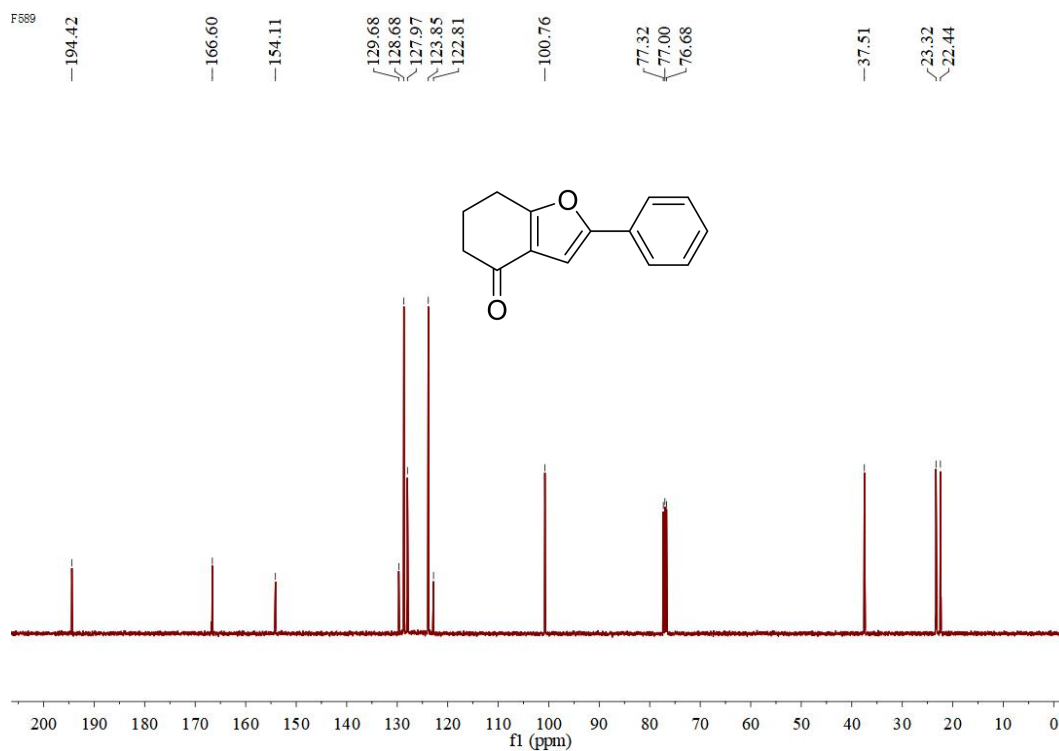

# <sup>1</sup>H NMR and <sup>13</sup>C NMR of 3b

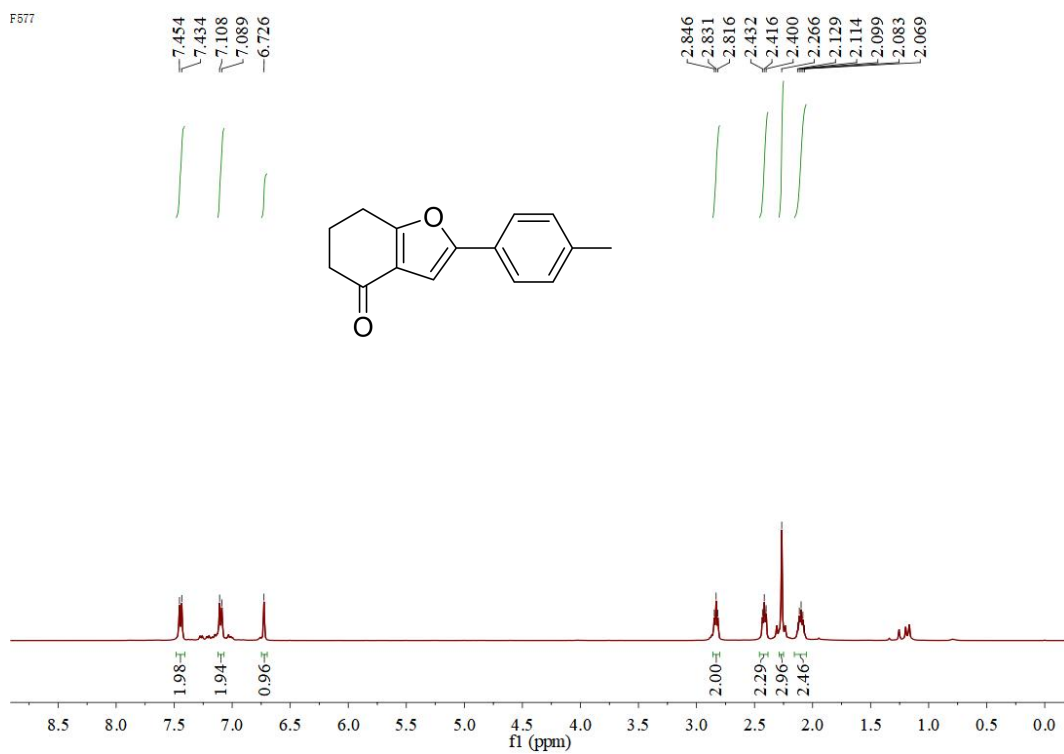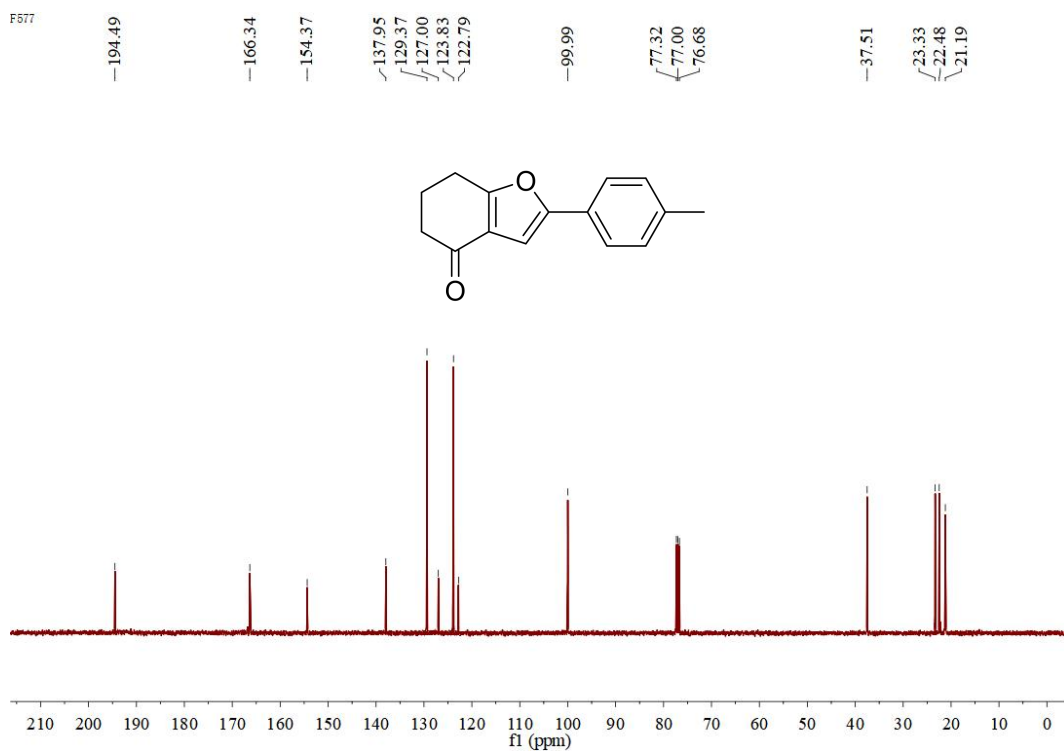

# <sup>1</sup>H NMR and <sup>13</sup>C NMR of 3c

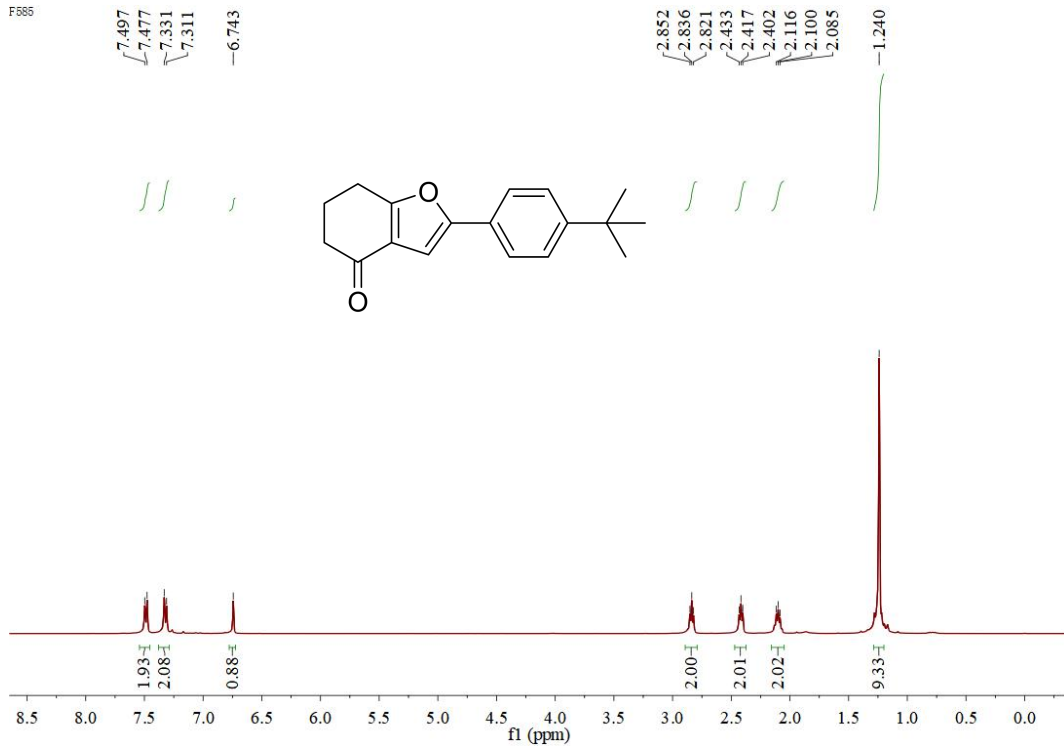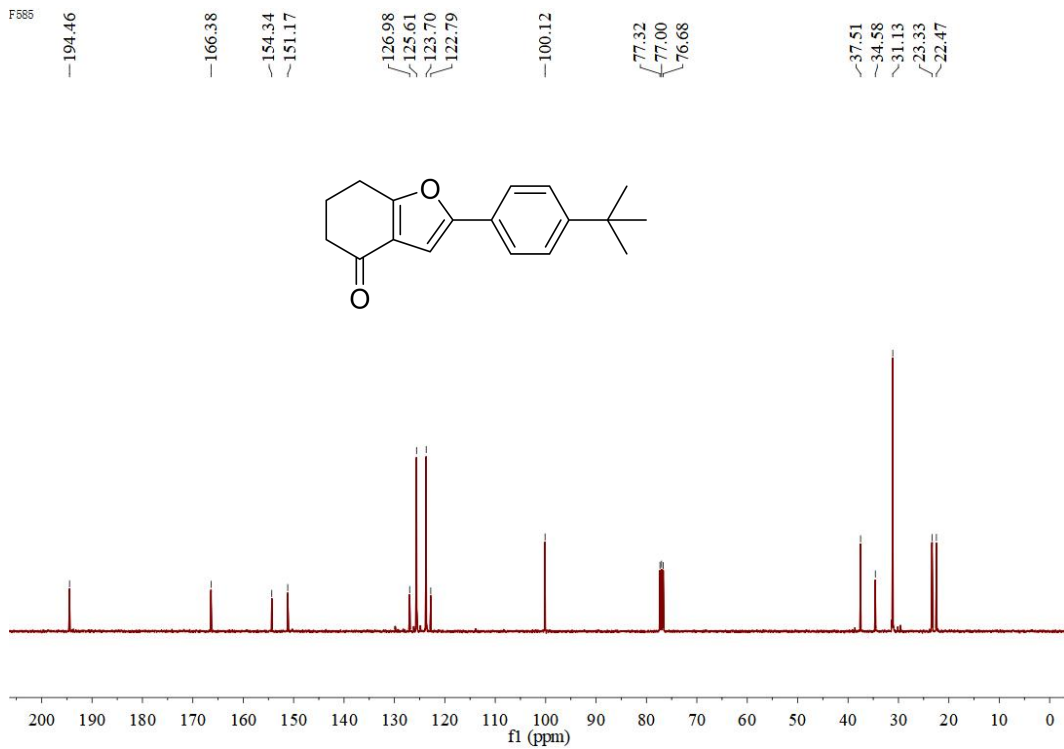

# <sup>1</sup>H NMR and <sup>13</sup>C NMR of 3d

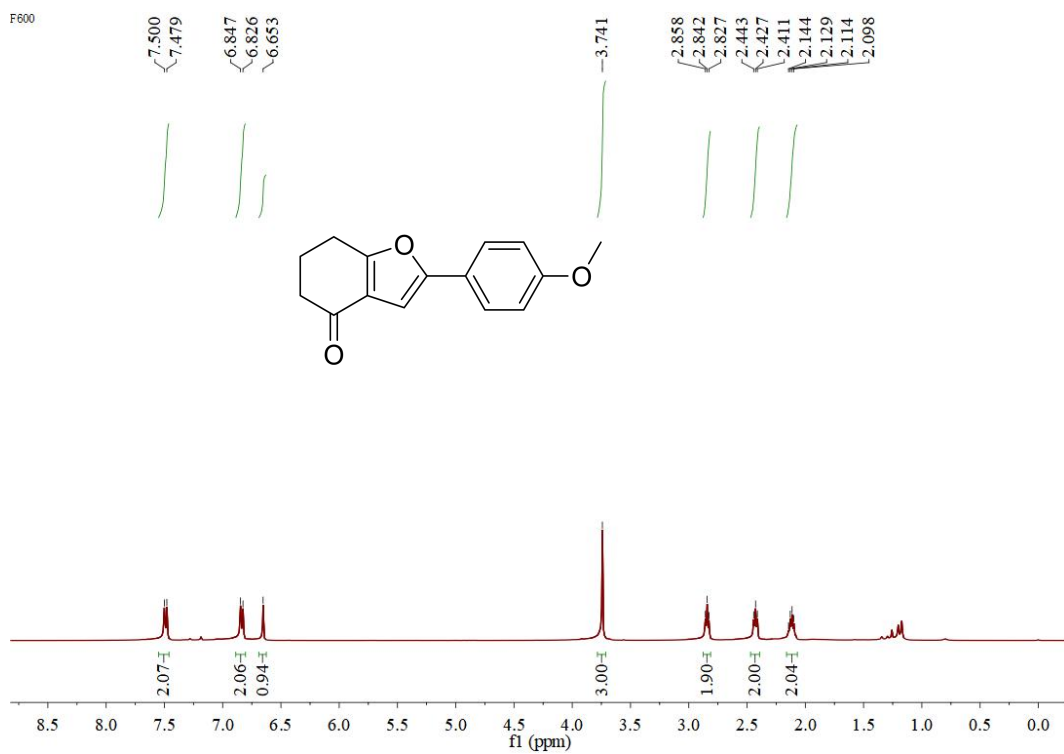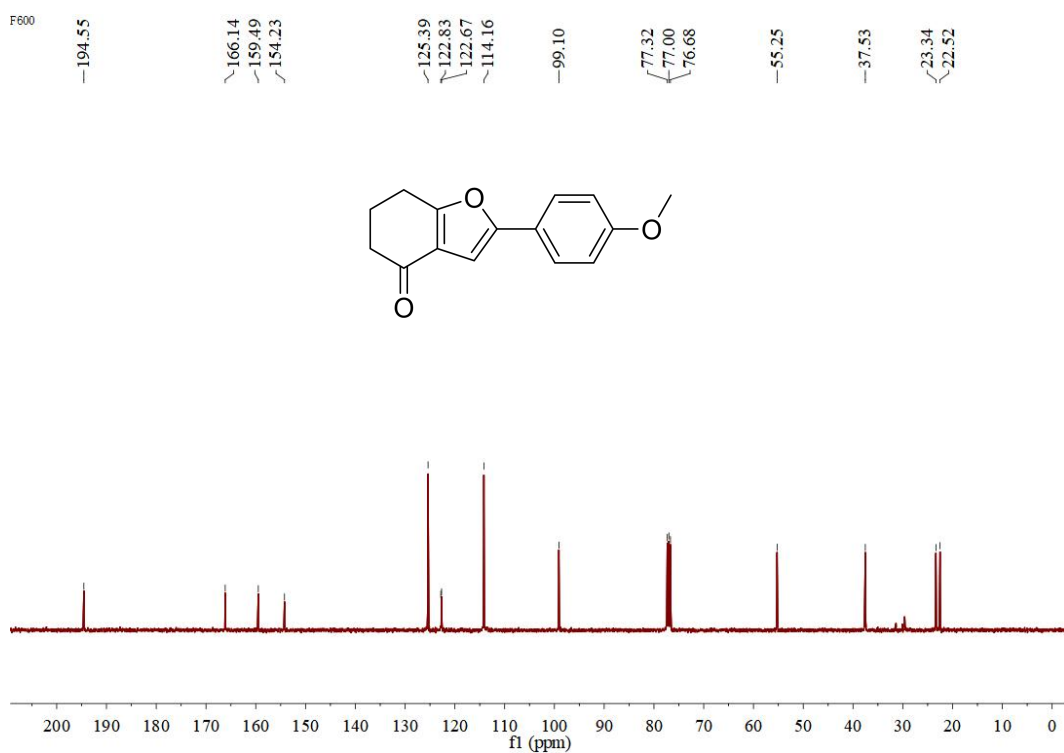

# <sup>1</sup>H NMR, <sup>13</sup>C NMR and <sup>19</sup>F NMR of 3e

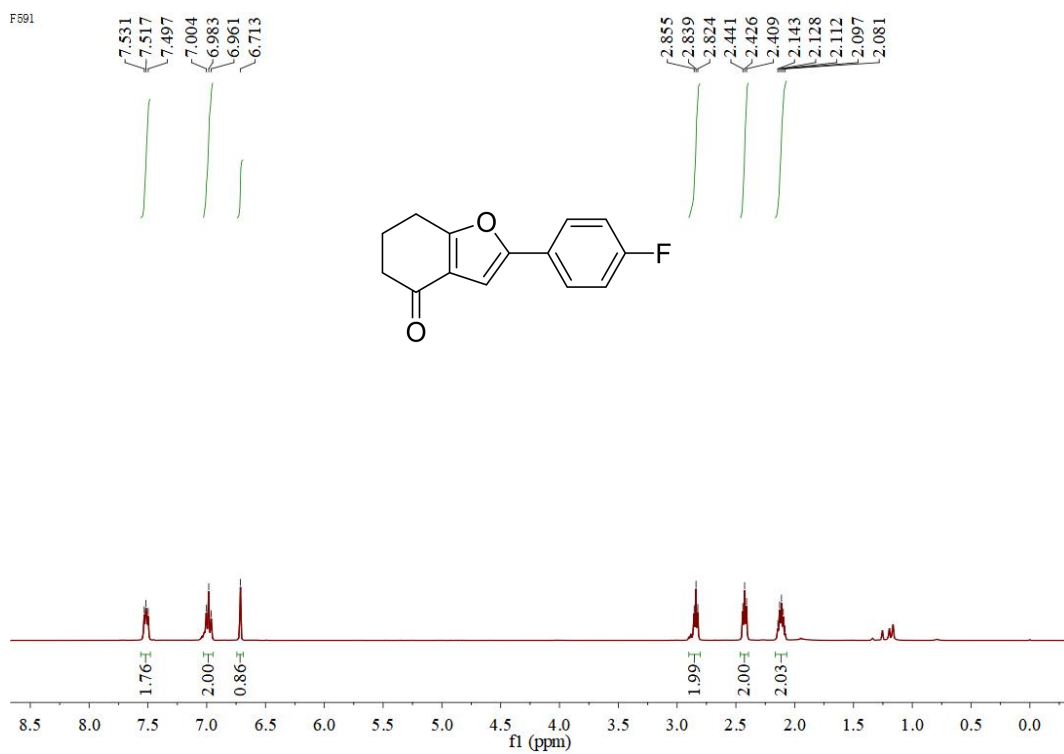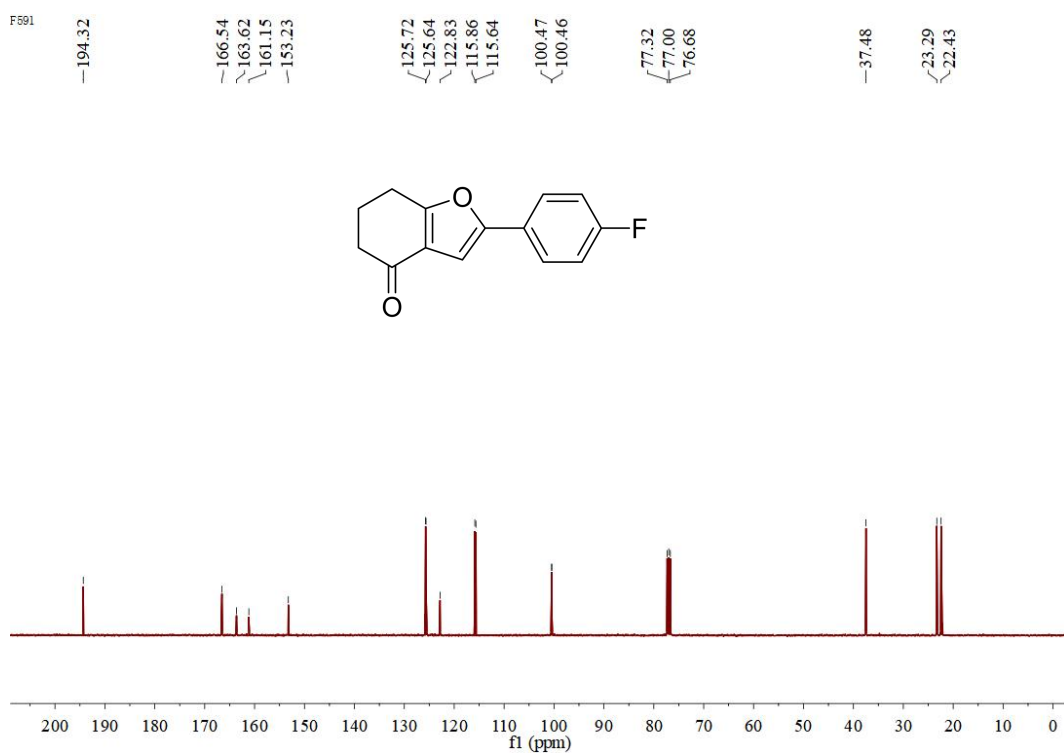

F691

→-112.95

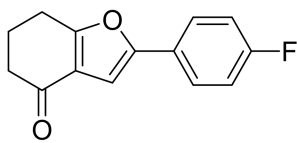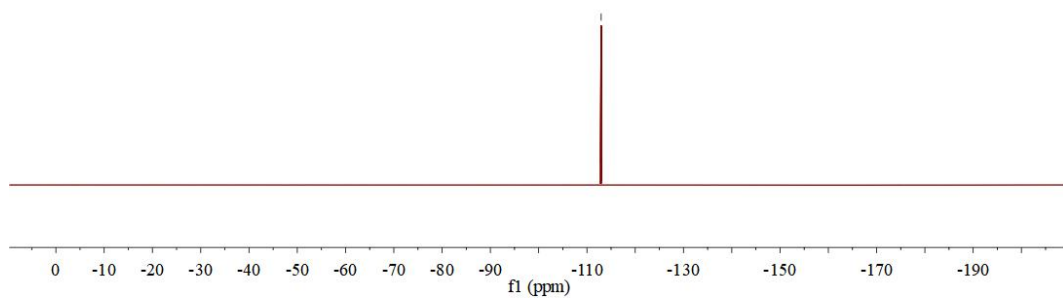



# <sup>1</sup>H NMR and <sup>13</sup>C NMR of 3f

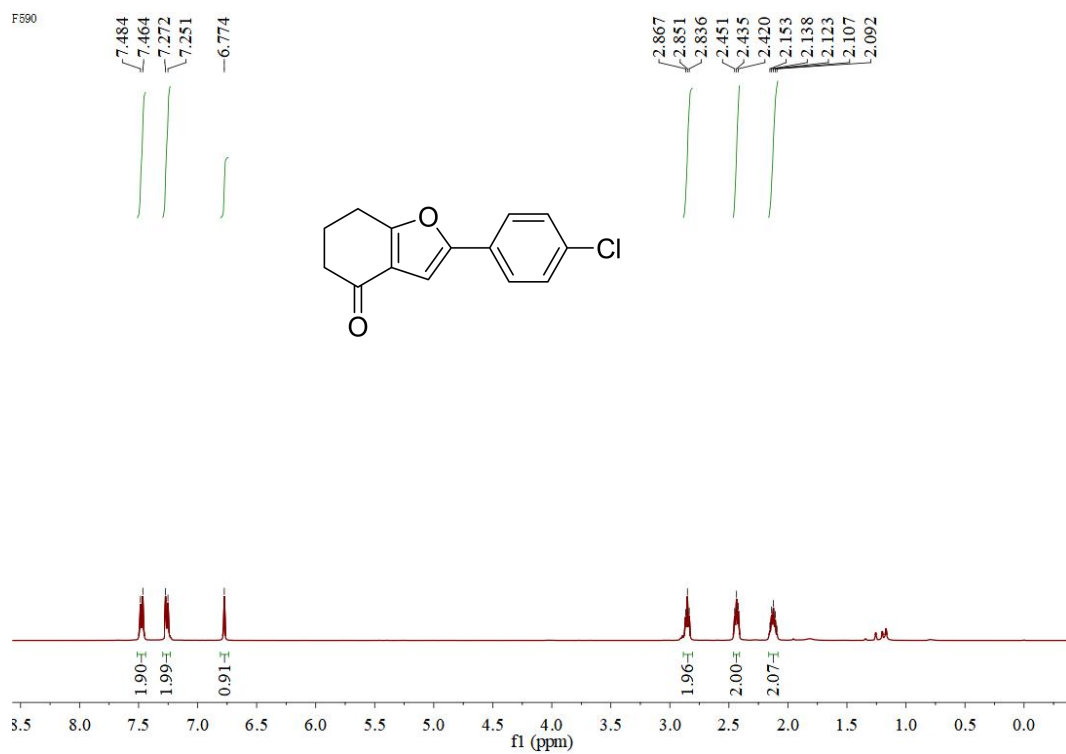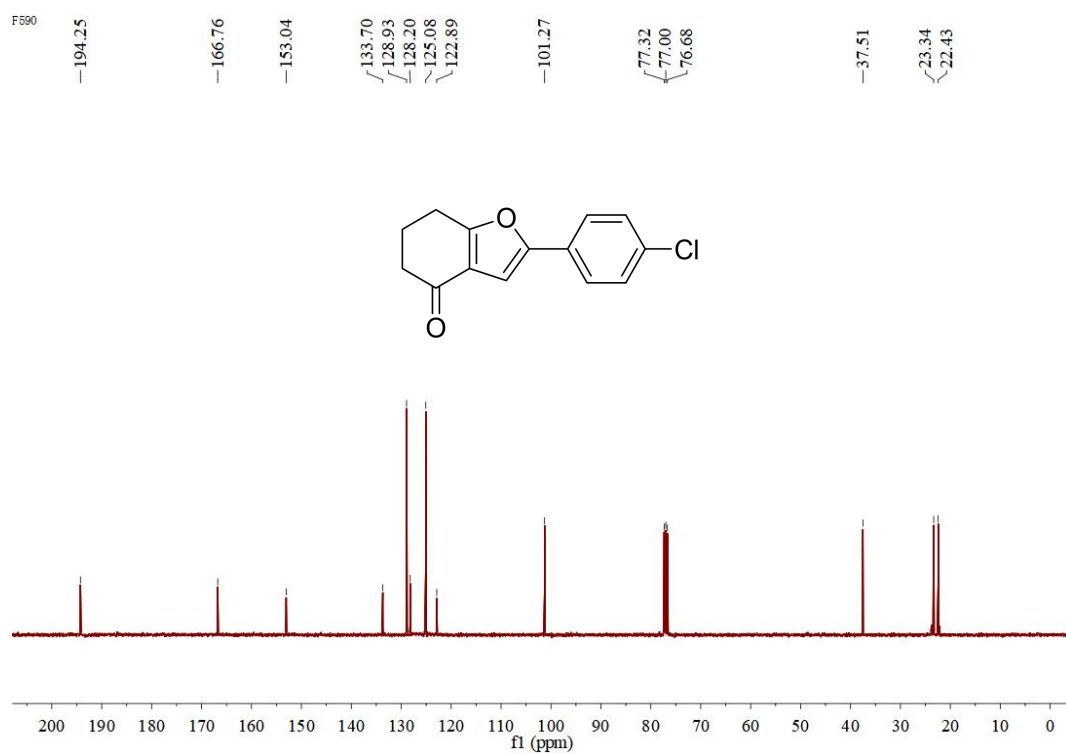

# <sup>1</sup>H NMR and <sup>13</sup>C NMR of 3g

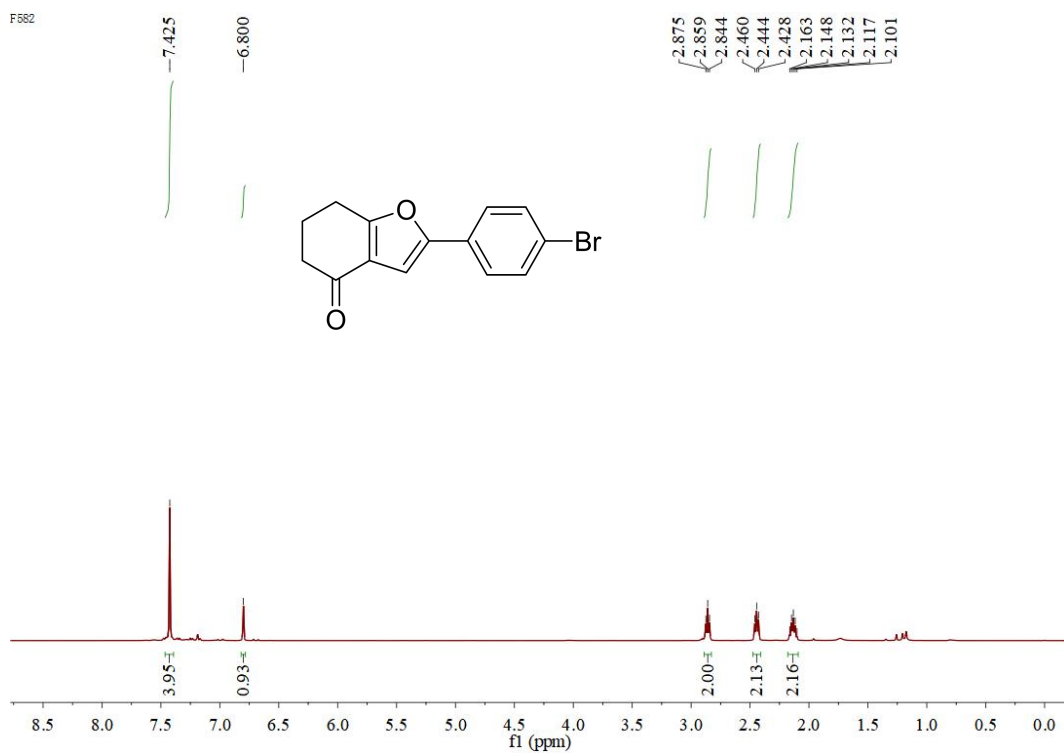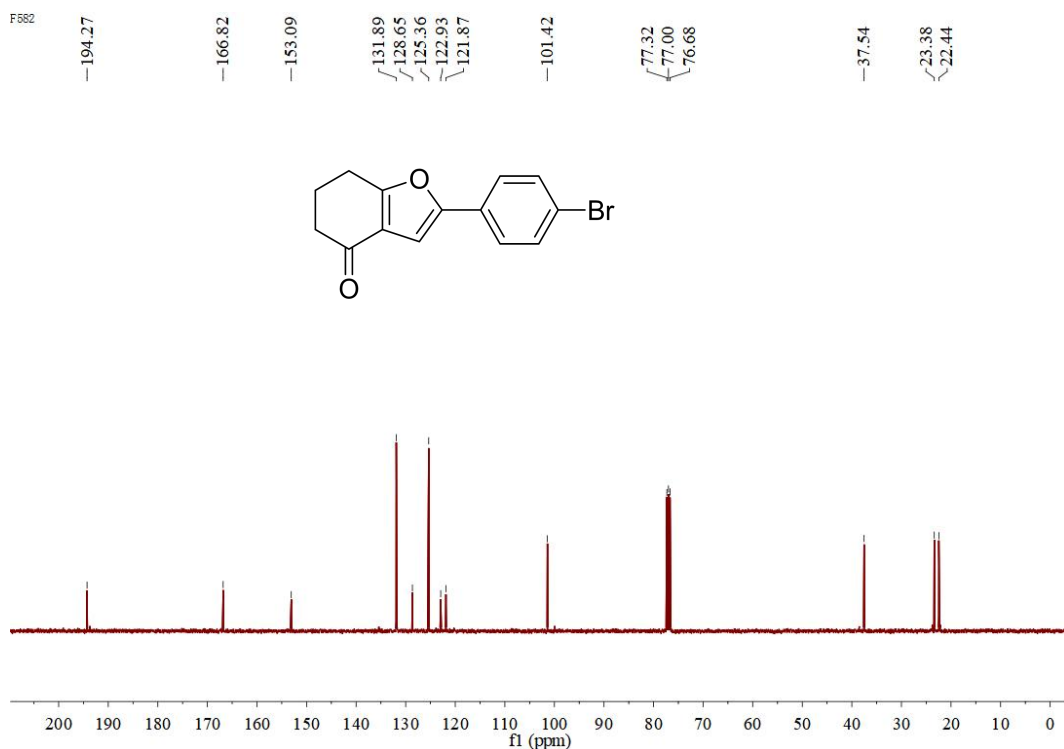

# <sup>1</sup>H NMR, <sup>13</sup>C NMR and <sup>19</sup>F NMR of 3h

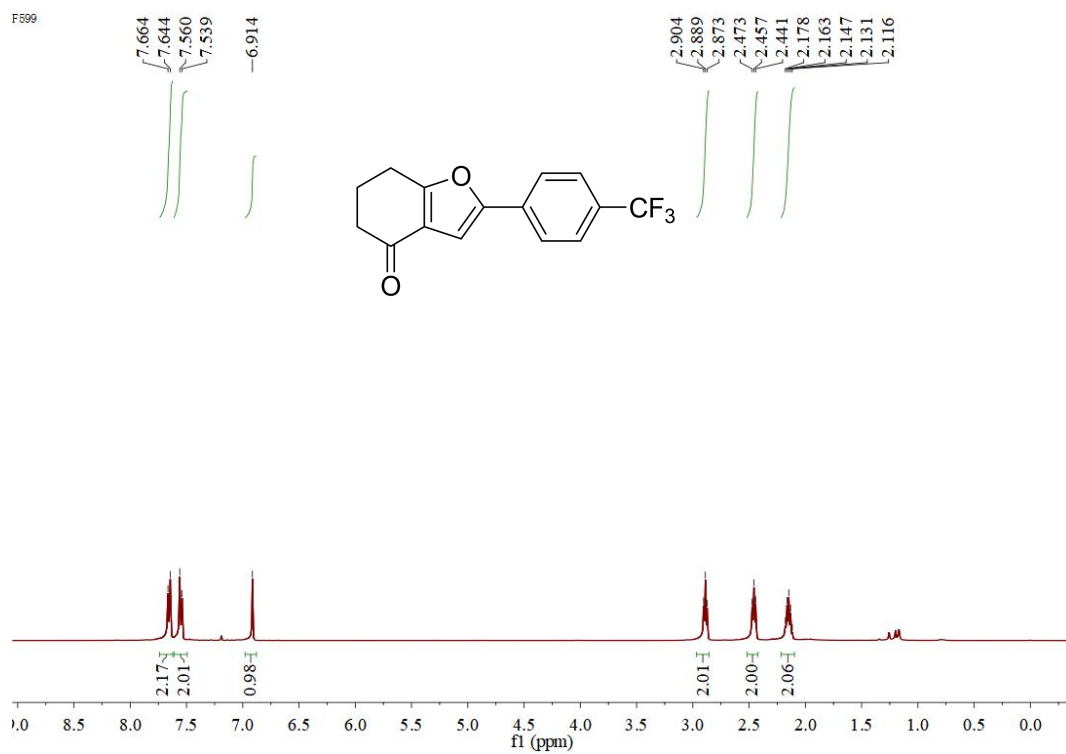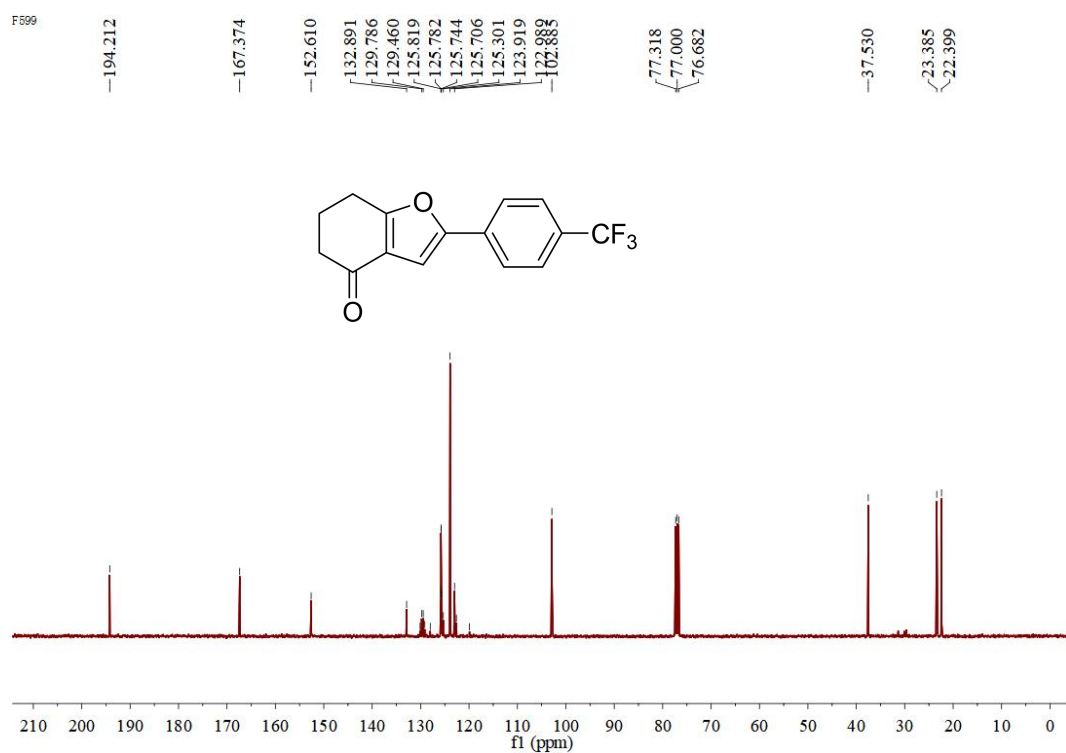

F599

---62.66

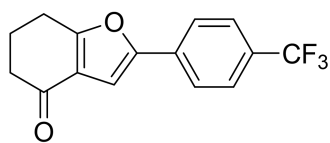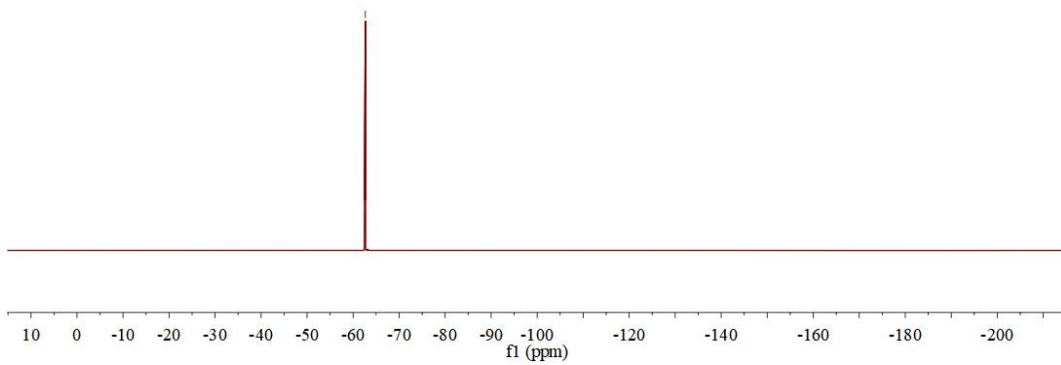

# <sup>1</sup>H NMR and <sup>13</sup>C NMR of 3i

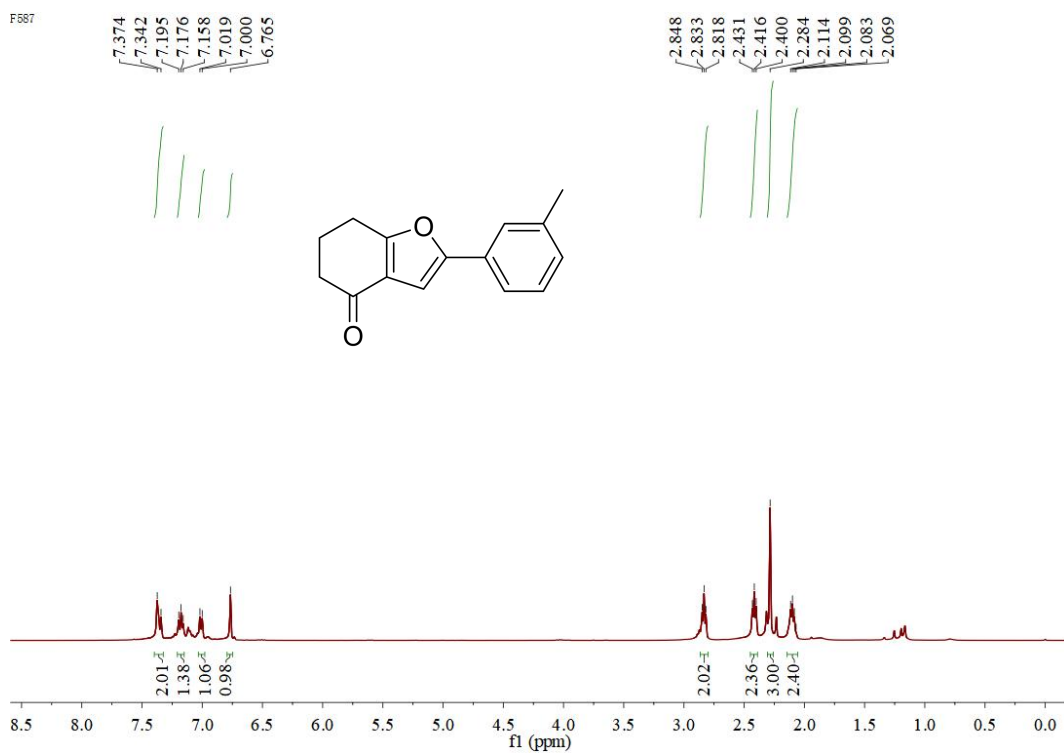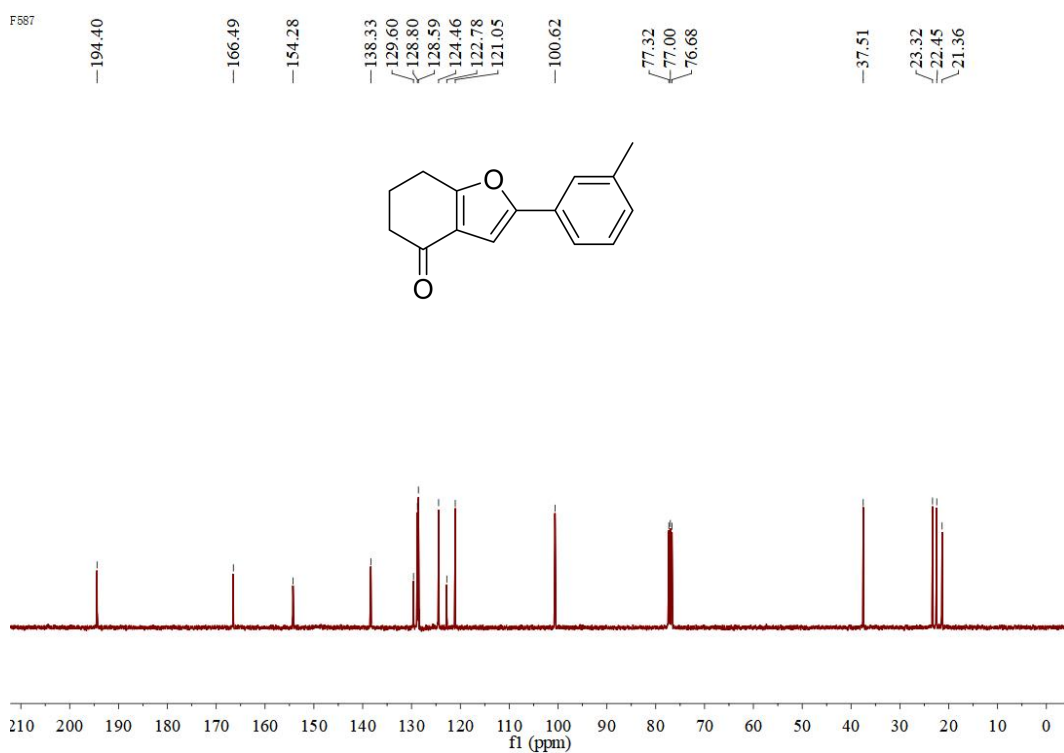

# <sup>1</sup>H NMR, <sup>13</sup>C NMR and <sup>19</sup>F NMR of 3j

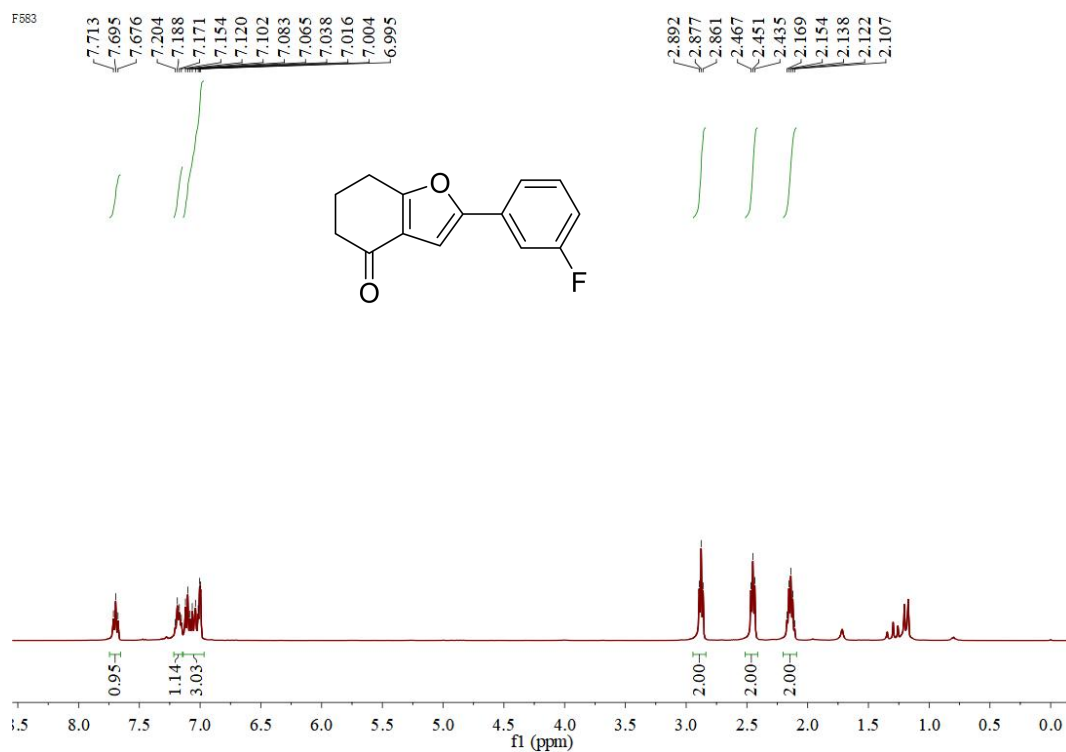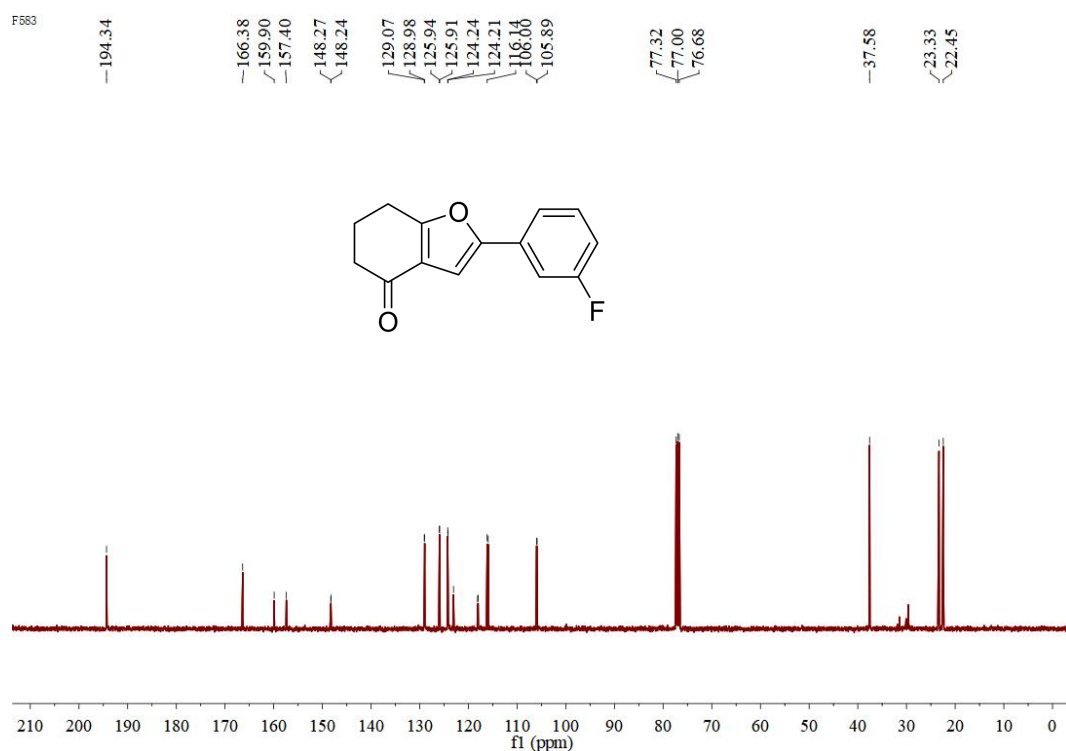

F883

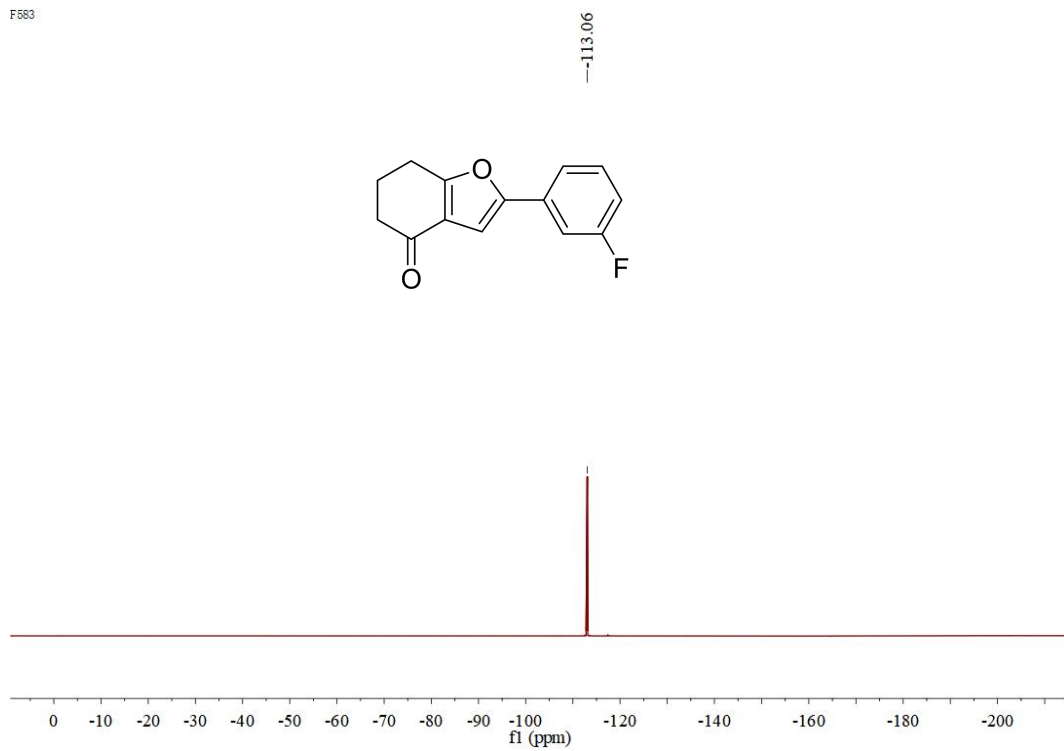

# <sup>1</sup>H NMR and <sup>13</sup>C NMR of 3k

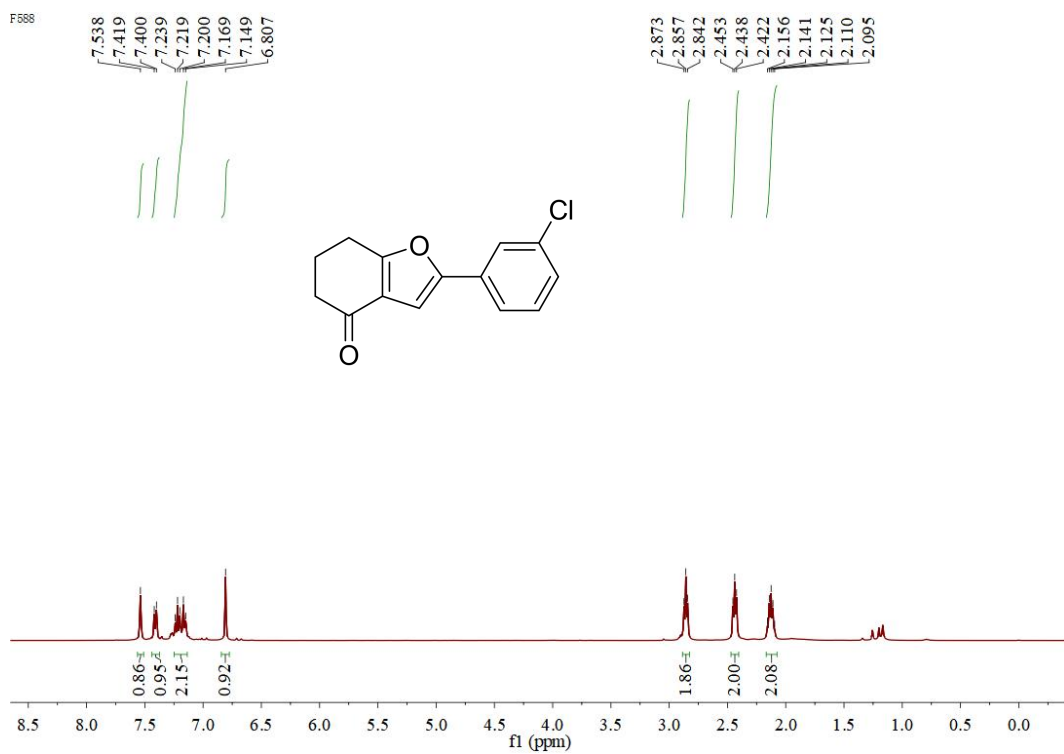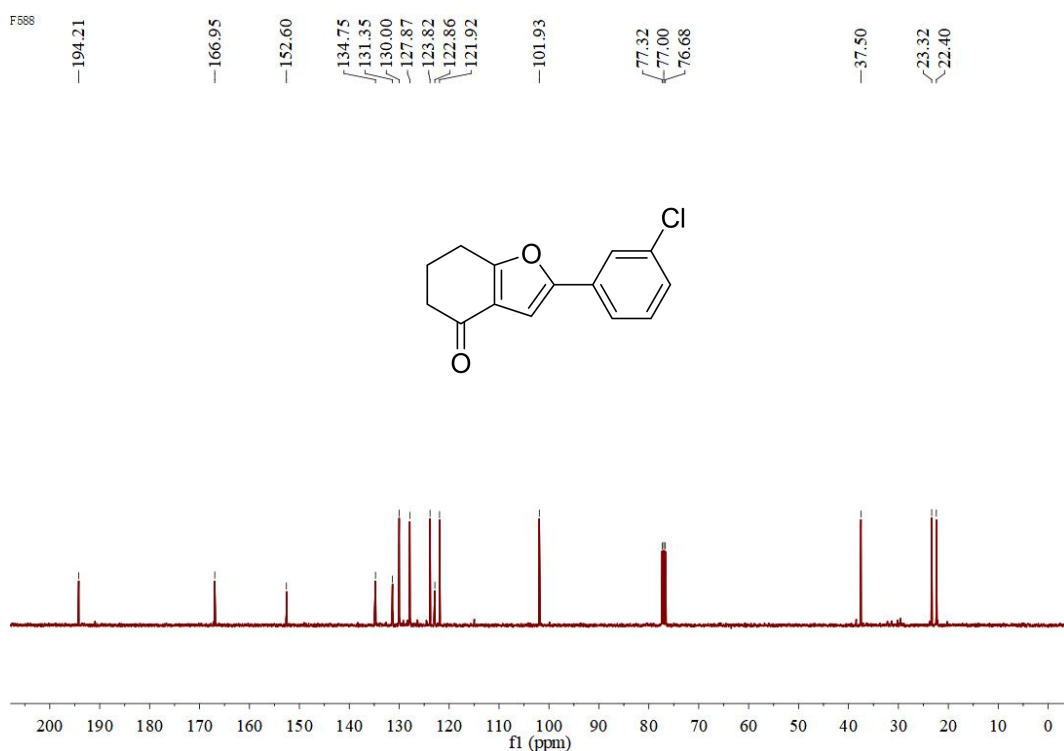



# <sup>1</sup>H NMR, <sup>13</sup>C NMR and <sup>19</sup>F NMR of 3l

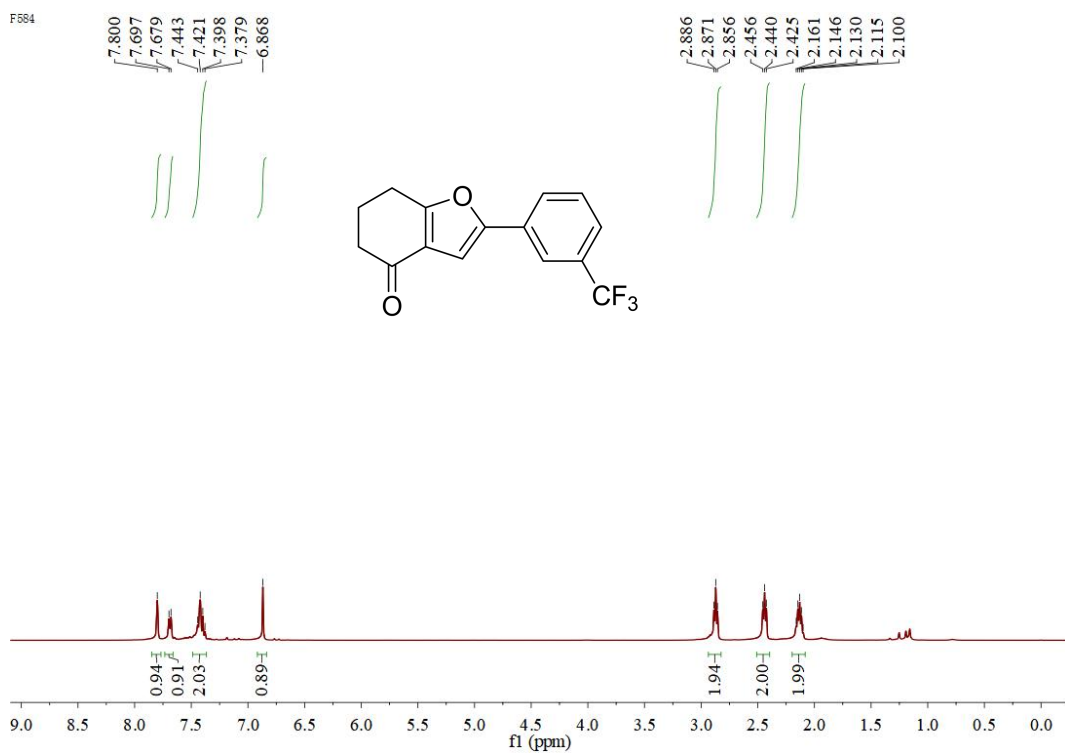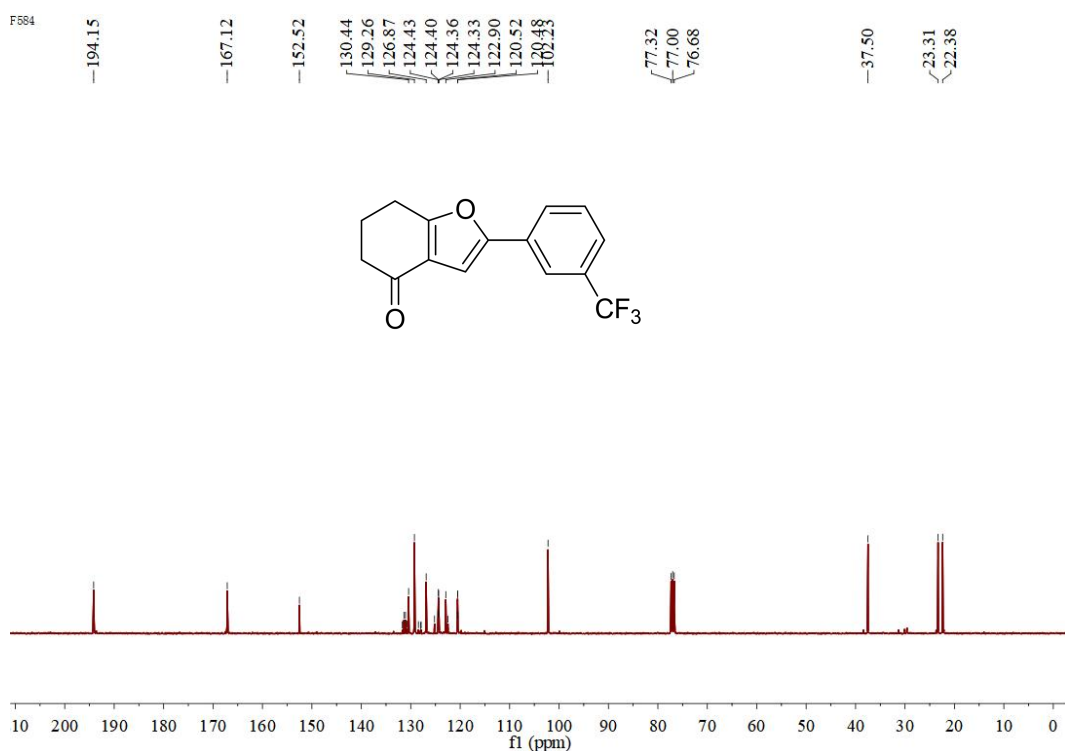

F584

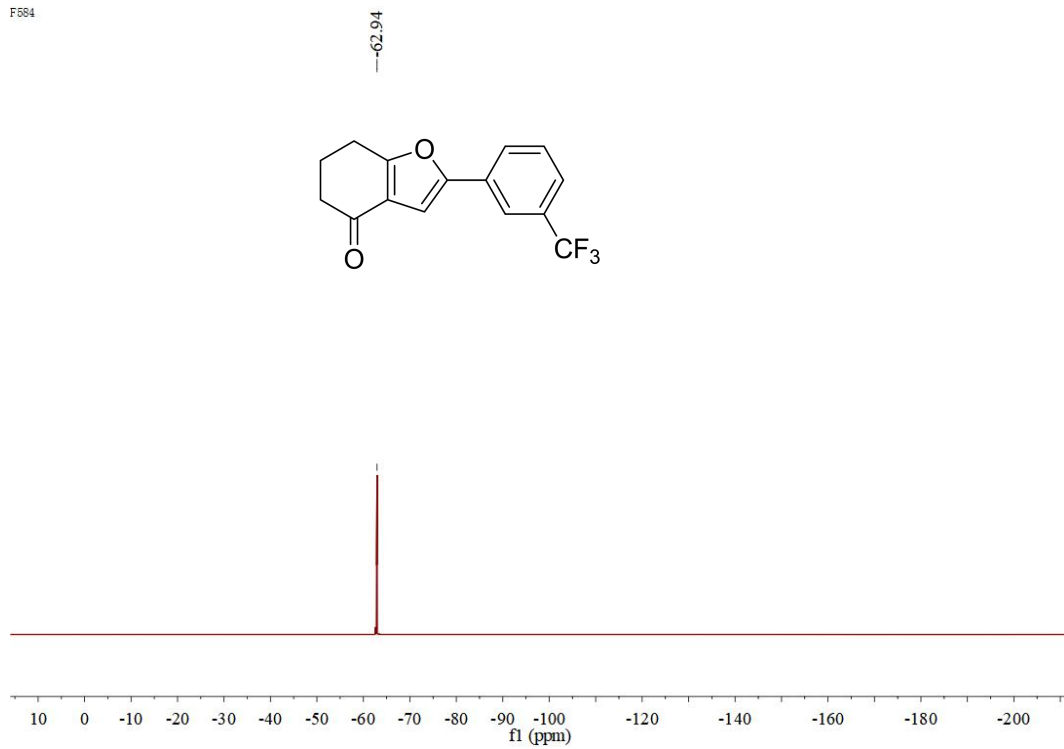

# <sup>1</sup>H NMR and <sup>13</sup>C NMR of 3m

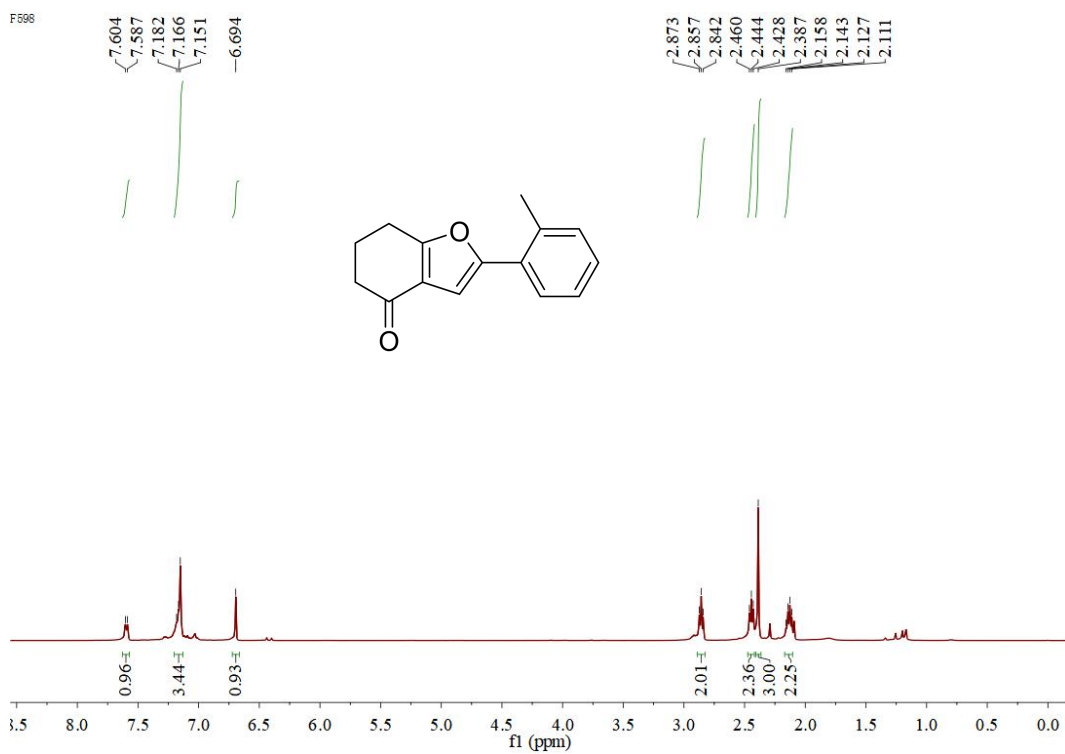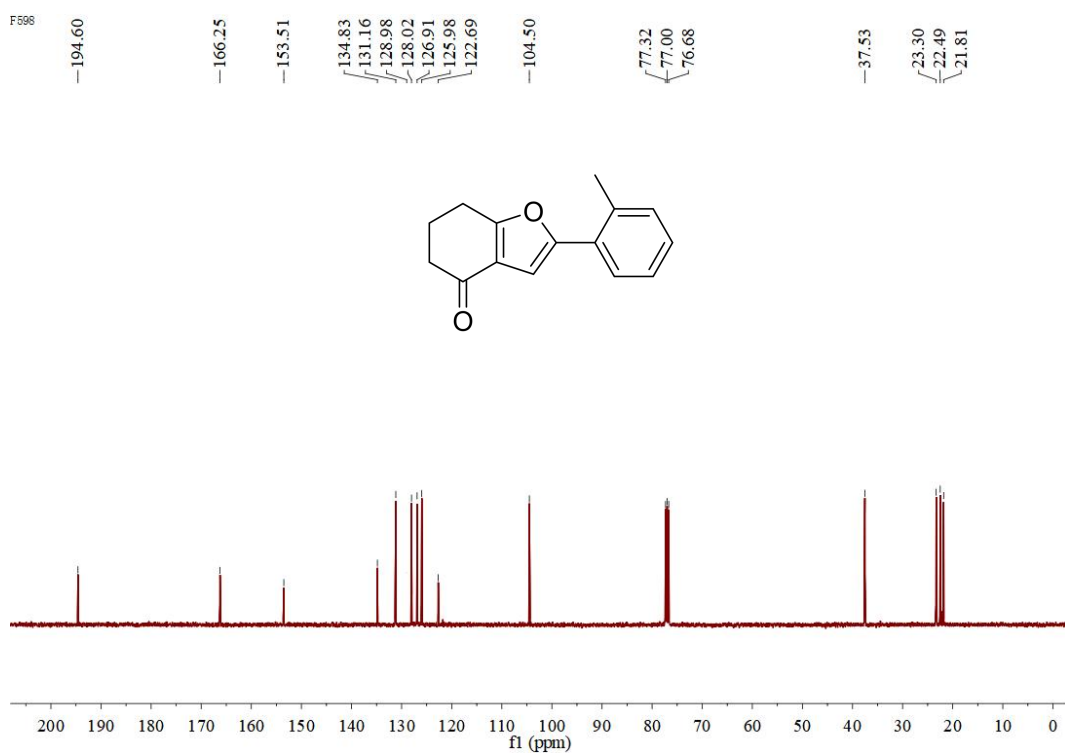

# <sup>1</sup>H NMR and <sup>13</sup>C NMR of 3n

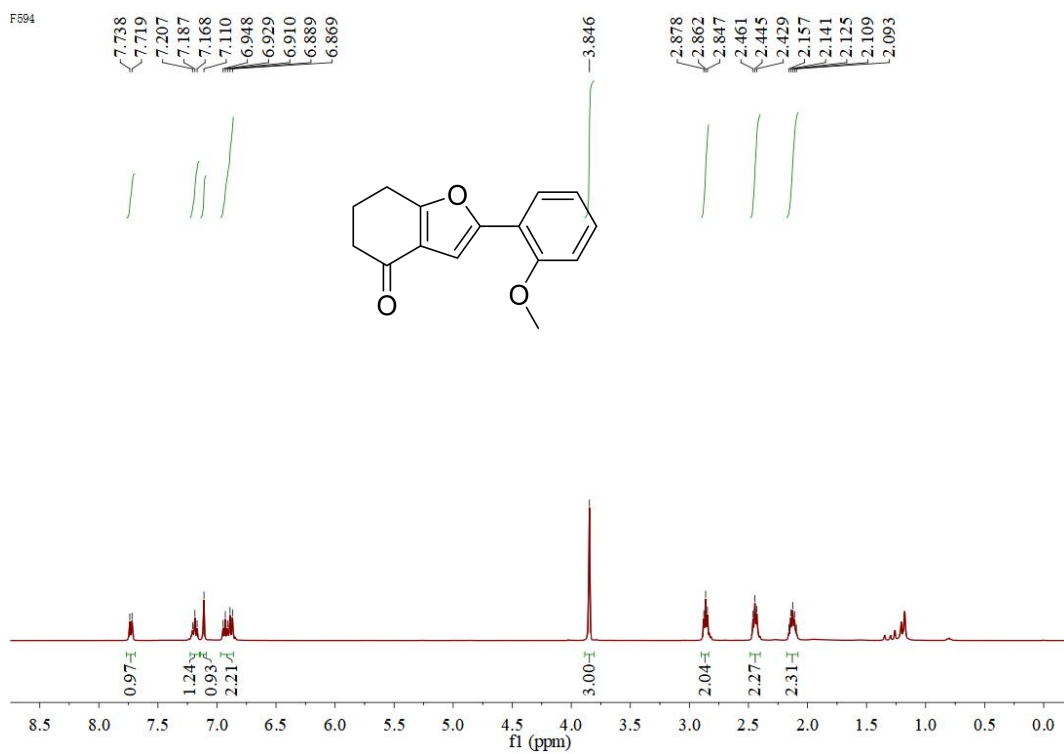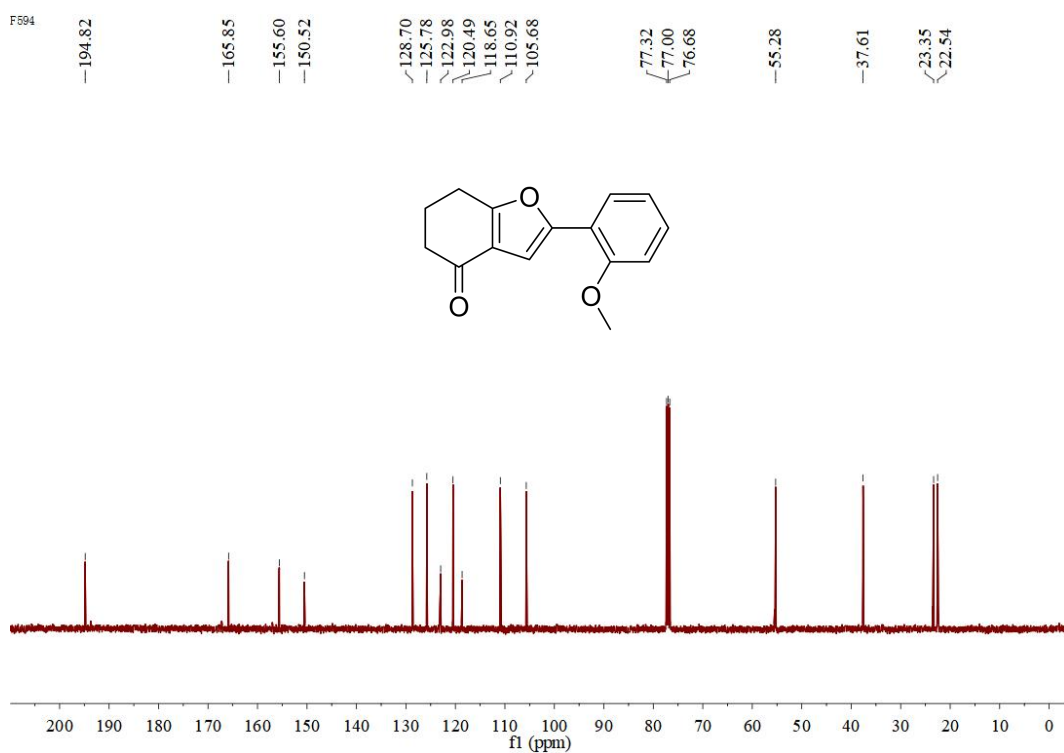

# <sup>1</sup>H NMR, <sup>13</sup>C NMR and <sup>19</sup>F NMR of 3o

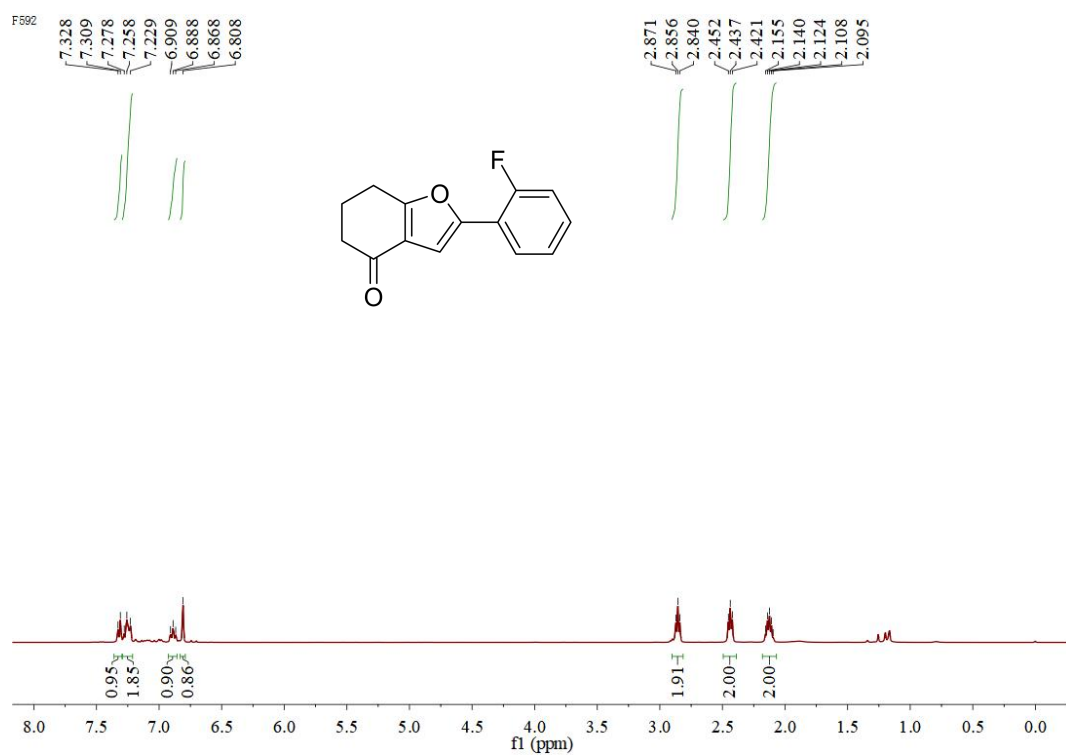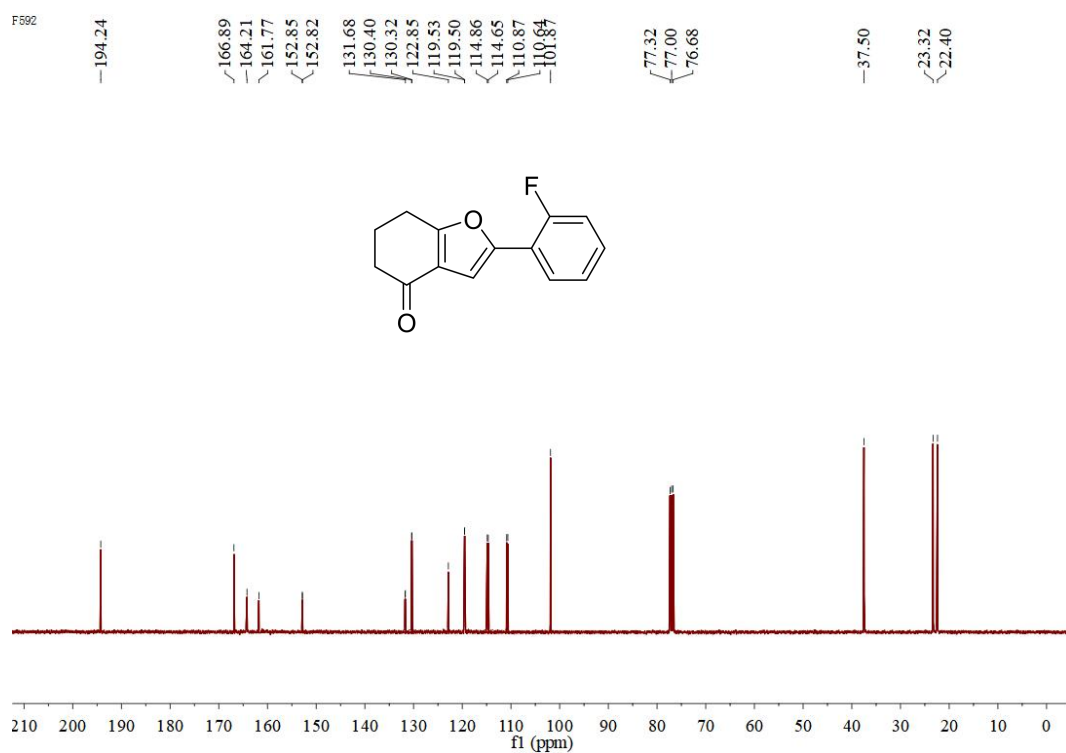

F692

→112.38

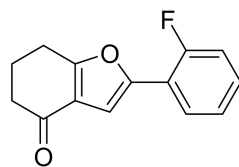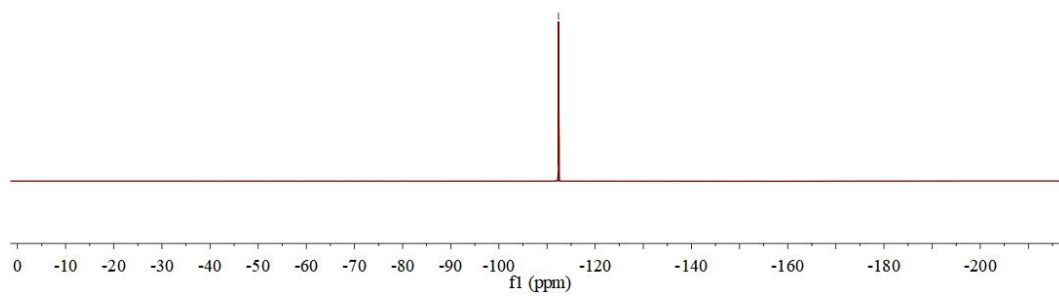

# <sup>1</sup>H NMR and <sup>13</sup>C NMR of 3p

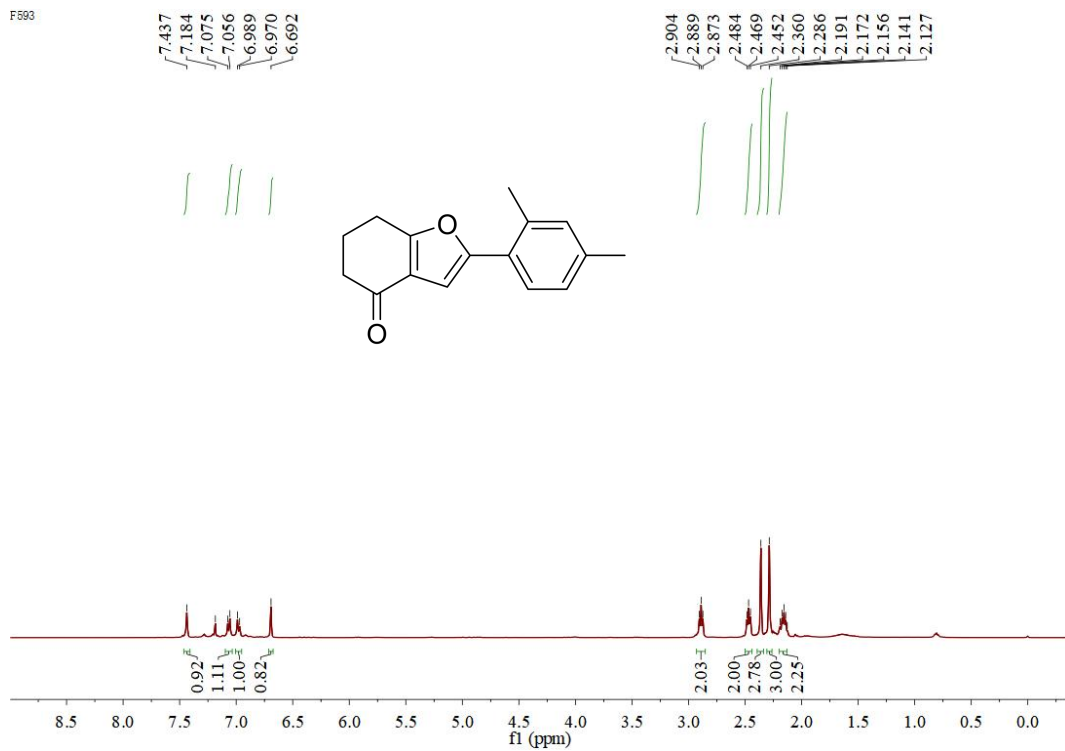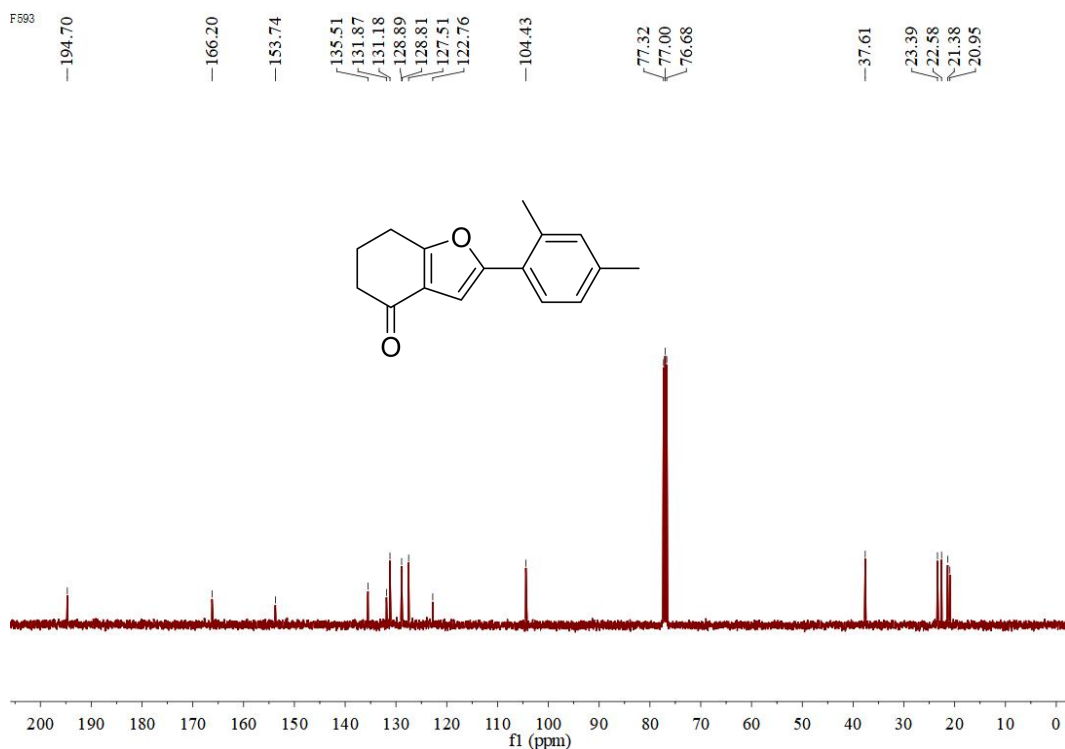

# <sup>1</sup>H NMR and <sup>13</sup>C NMR of 3q

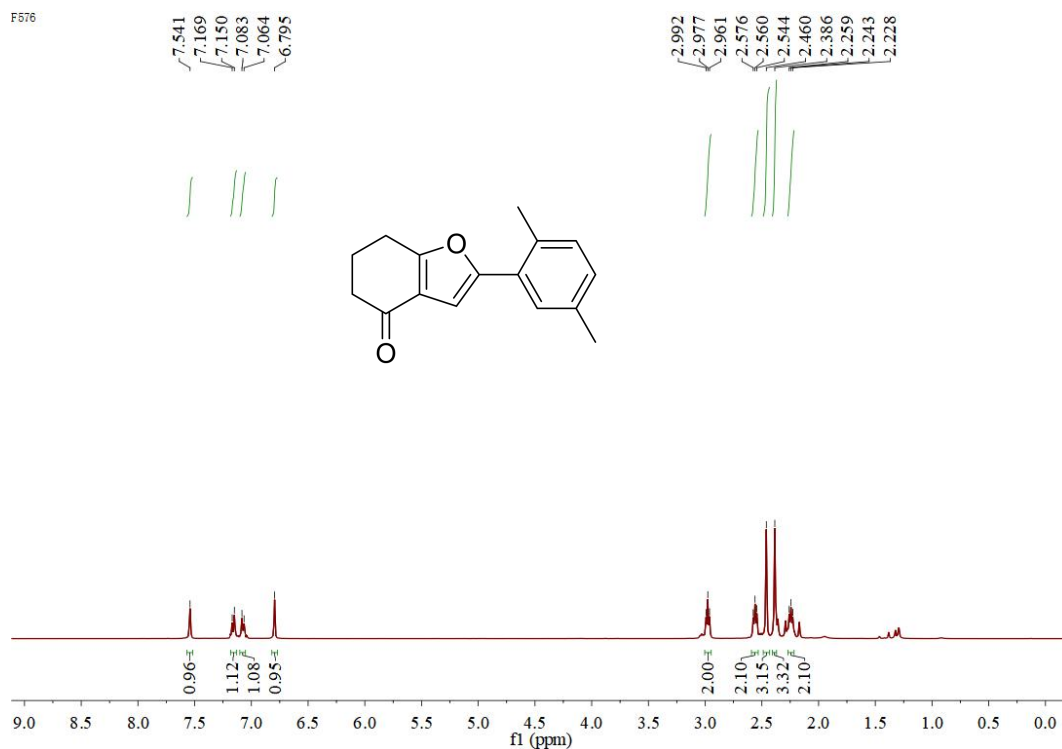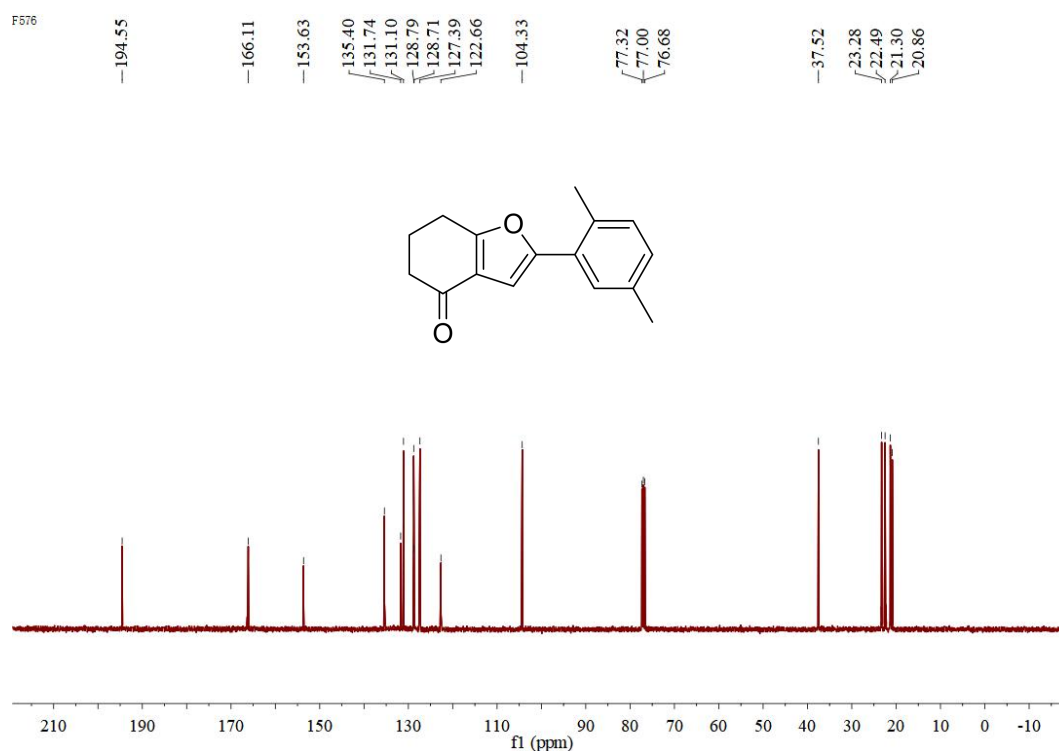



# <sup>1</sup>H NMR and <sup>13</sup>C NMR of 3r

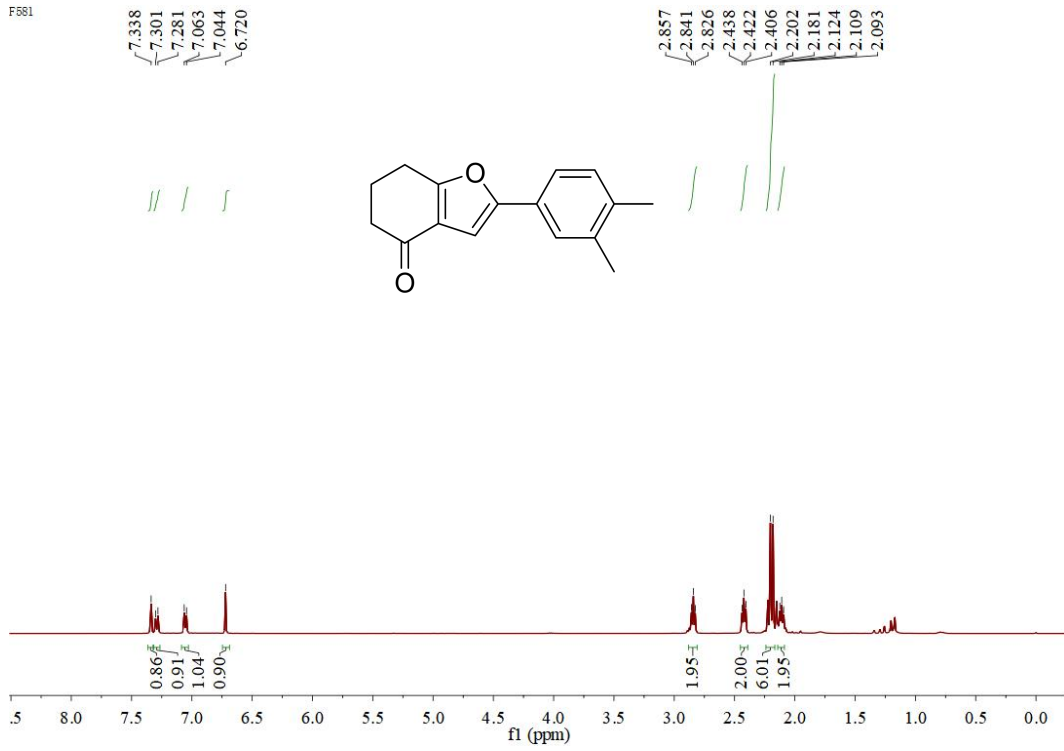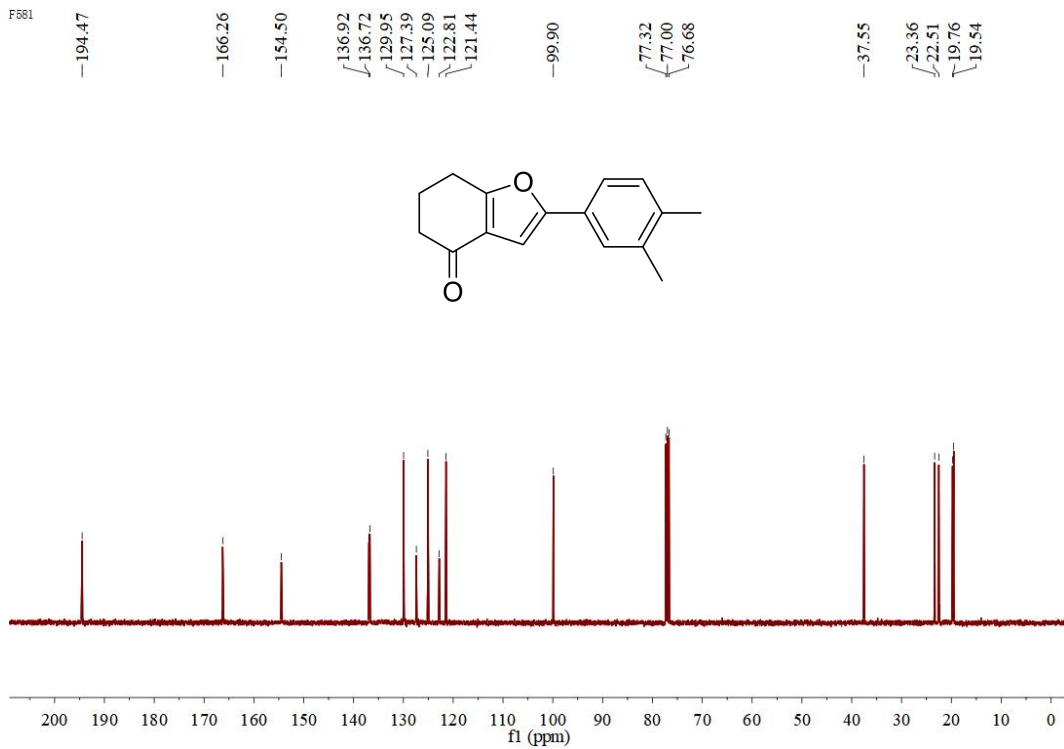

# <sup>1</sup>H NMR and <sup>13</sup>C NMR of 3s

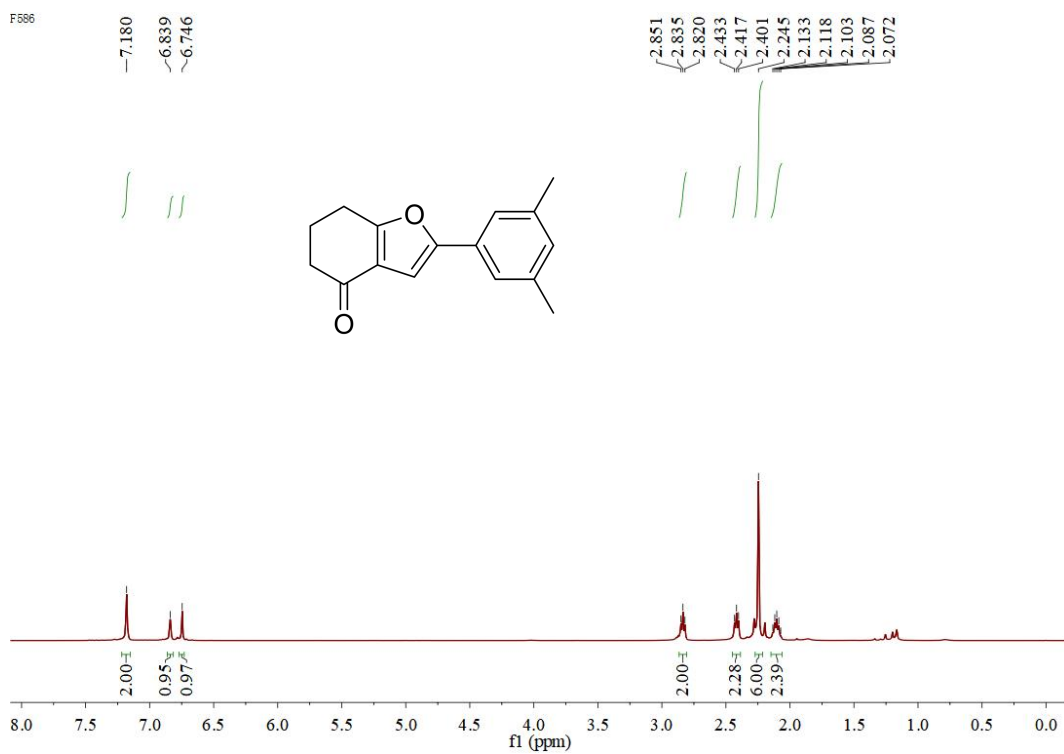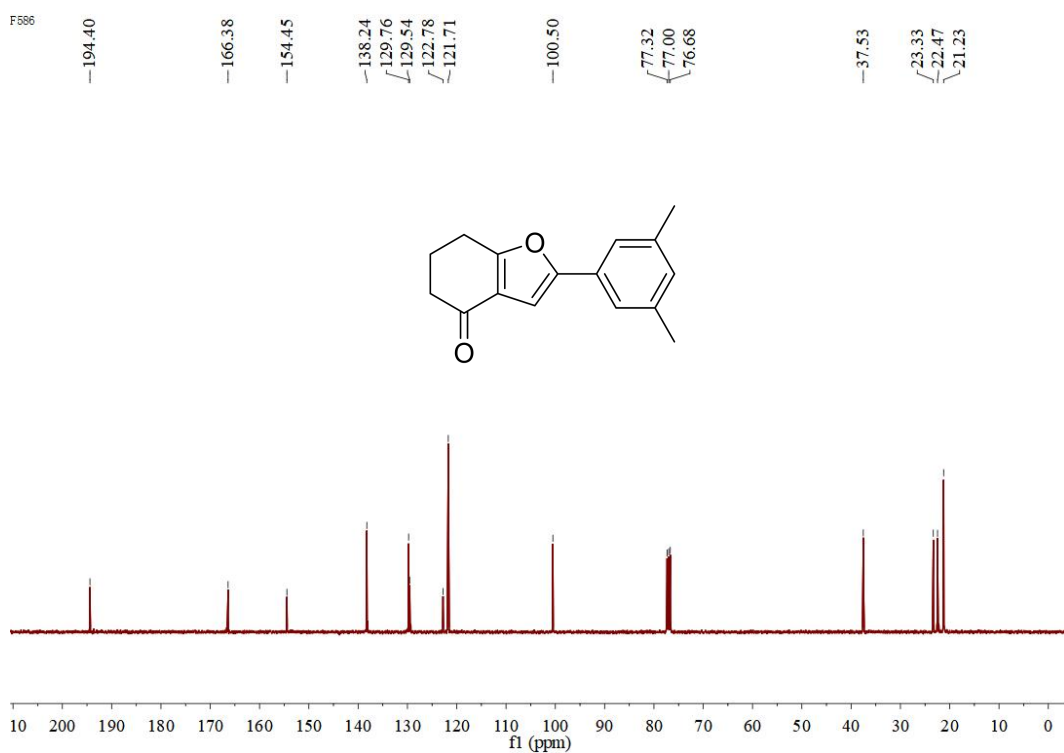

# <sup>1</sup>H NMR and <sup>13</sup>C NMR of 3t

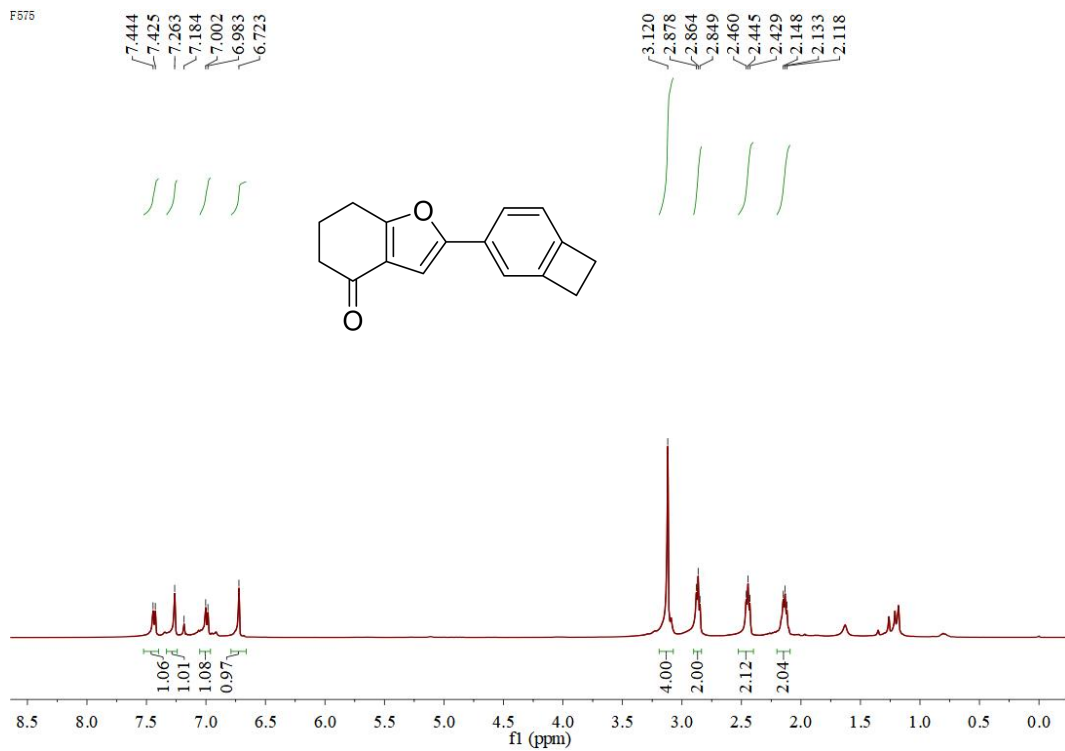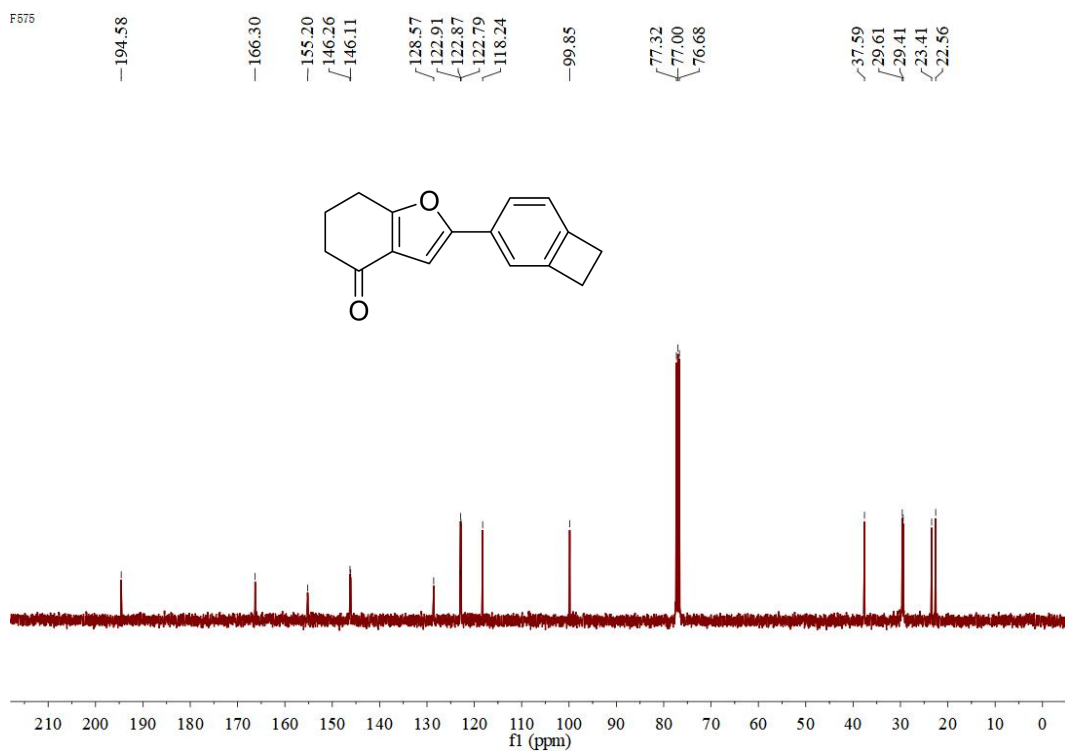

# <sup>1</sup>H NMR and <sup>13</sup>C NMR of 3u

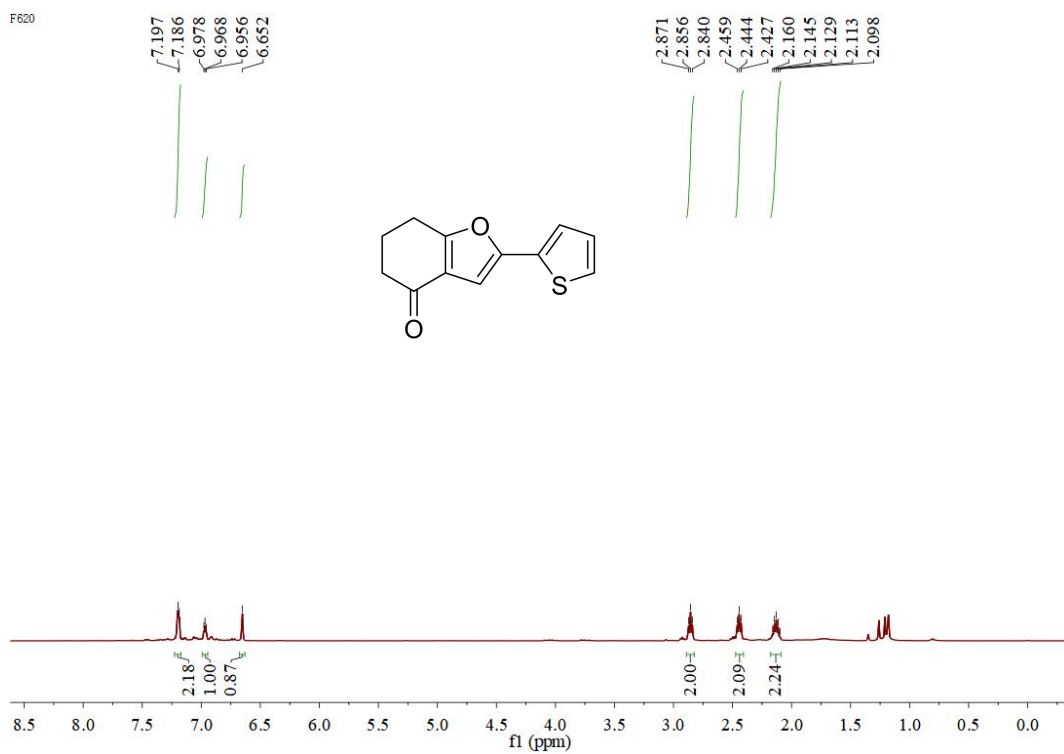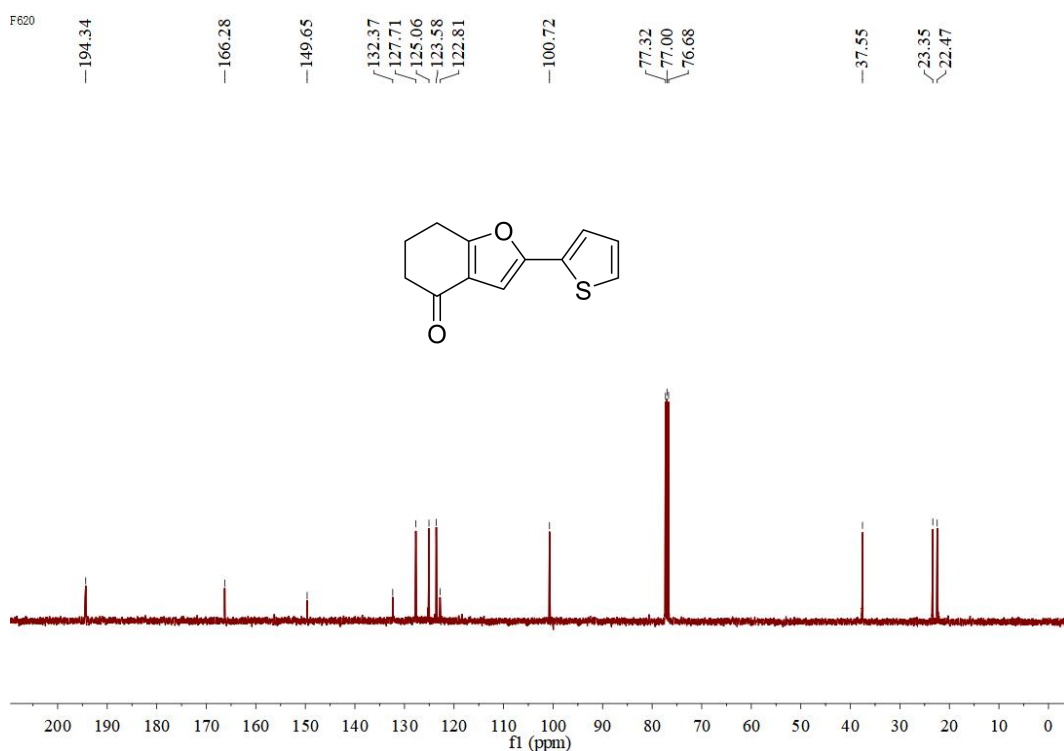

# <sup>1</sup>H NMR and <sup>13</sup>C NMR of 3v

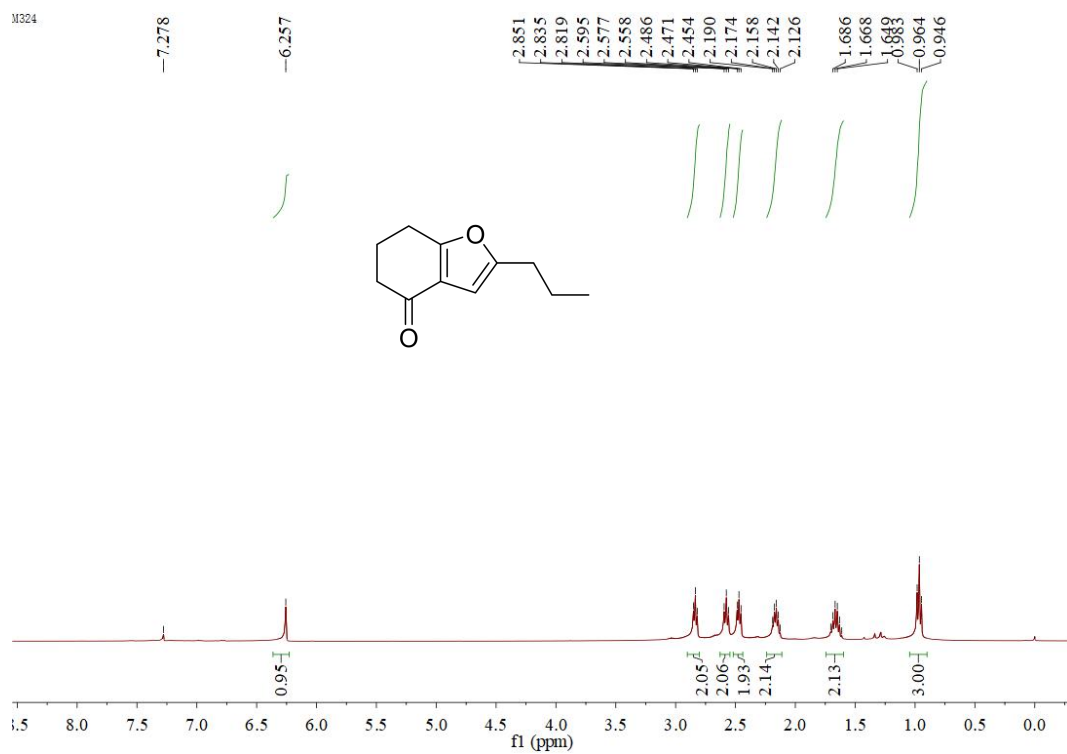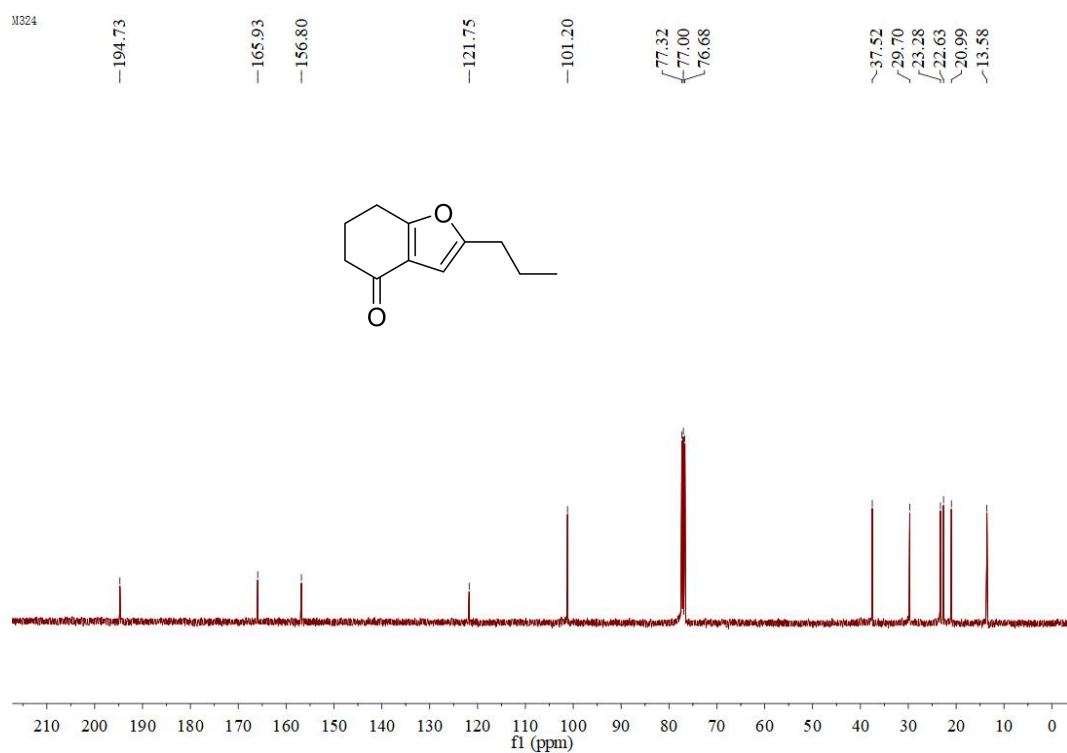

# <sup>1</sup>H NMR and <sup>13</sup>C NMR of 3w

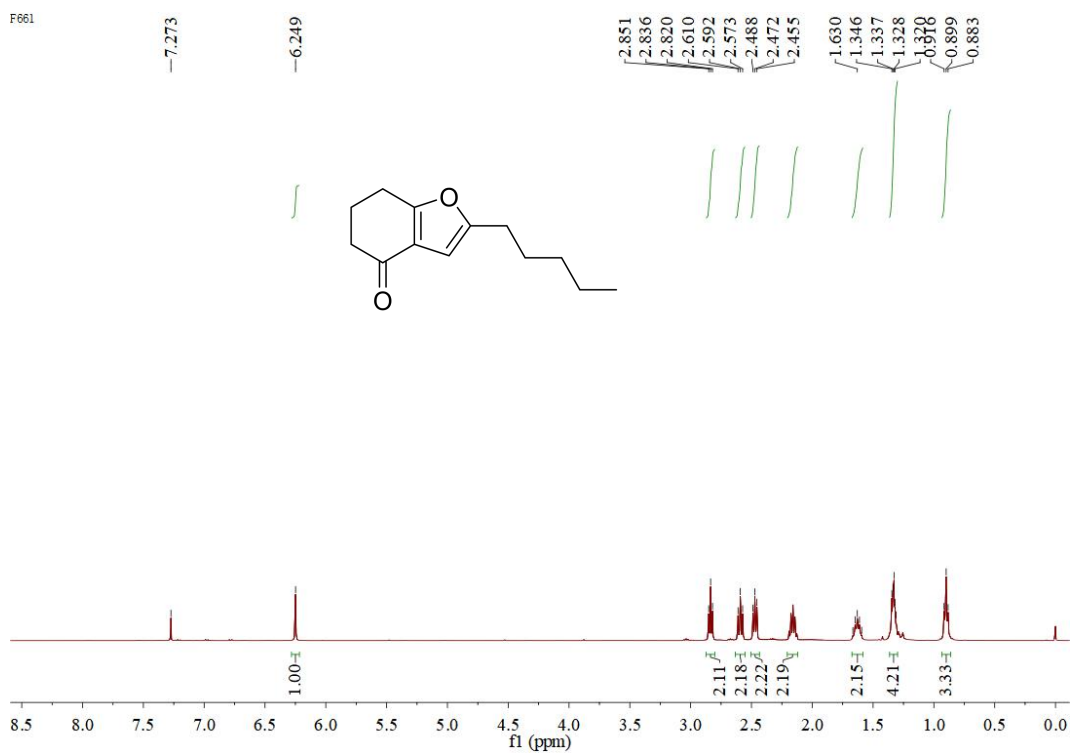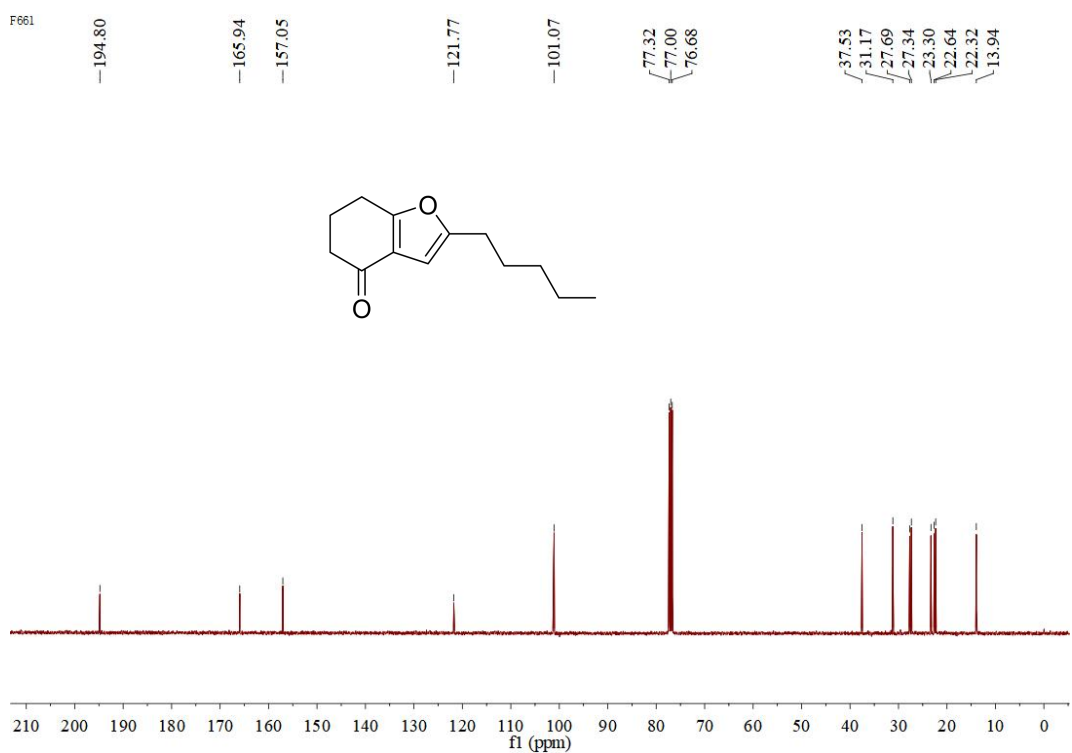

# <sup>1</sup>H NMR and <sup>13</sup>C NMR of 3x

M247

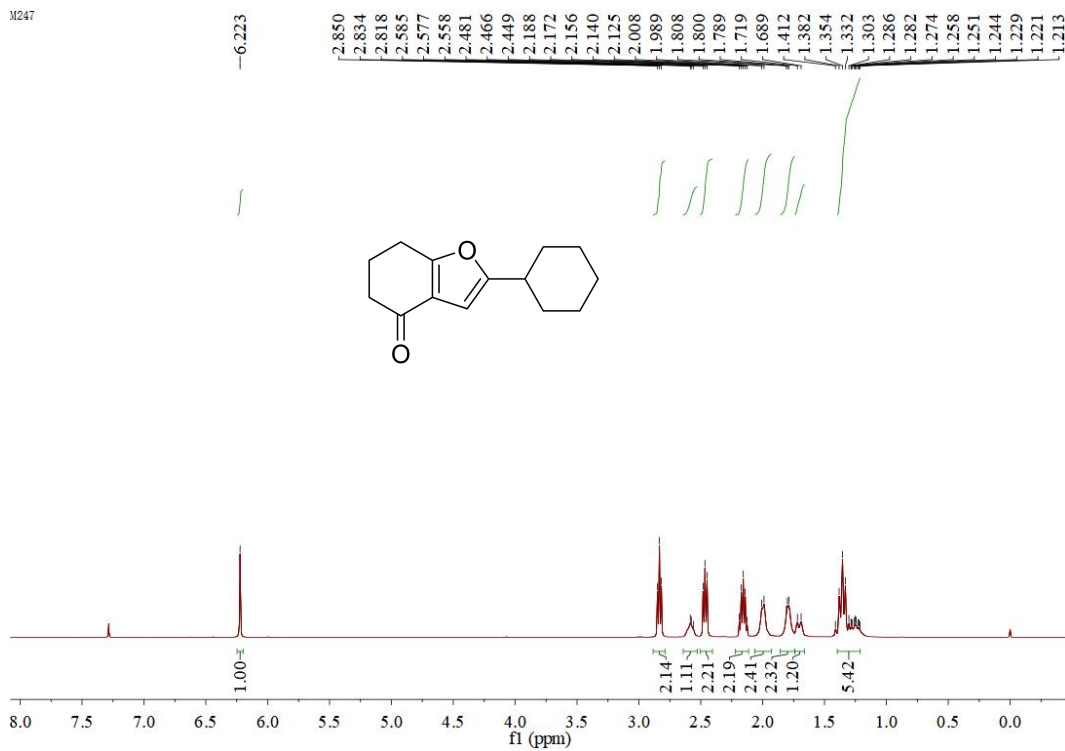

M247

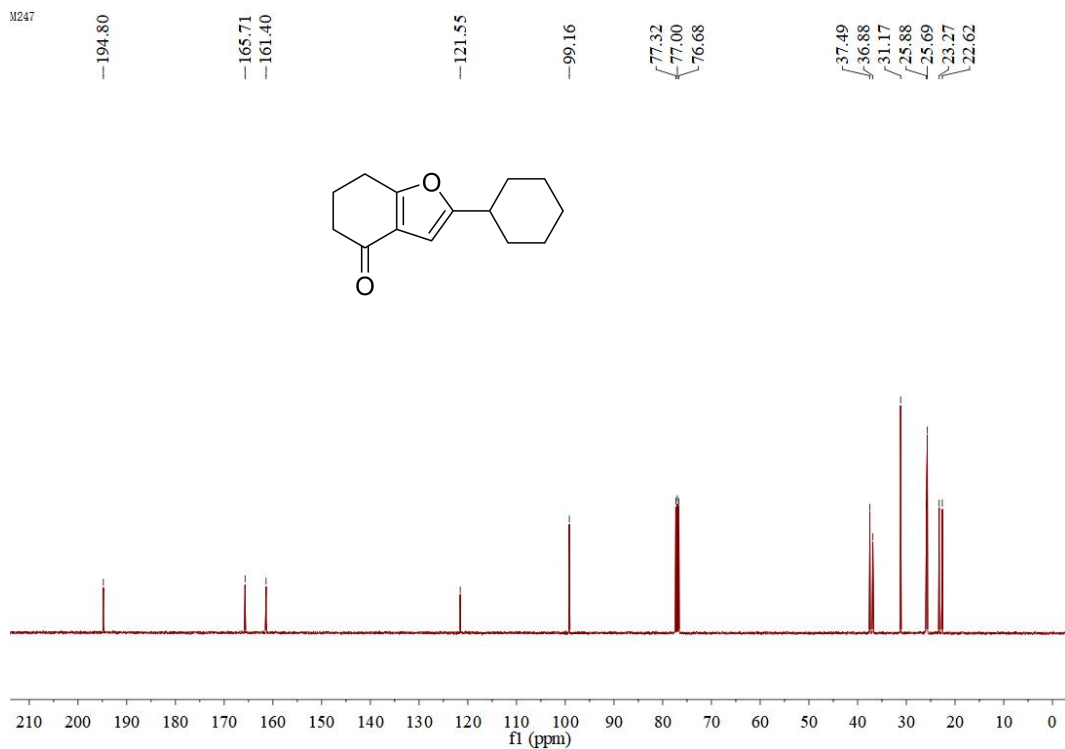

# <sup>1</sup>H NMR and <sup>13</sup>C NMR of 3y

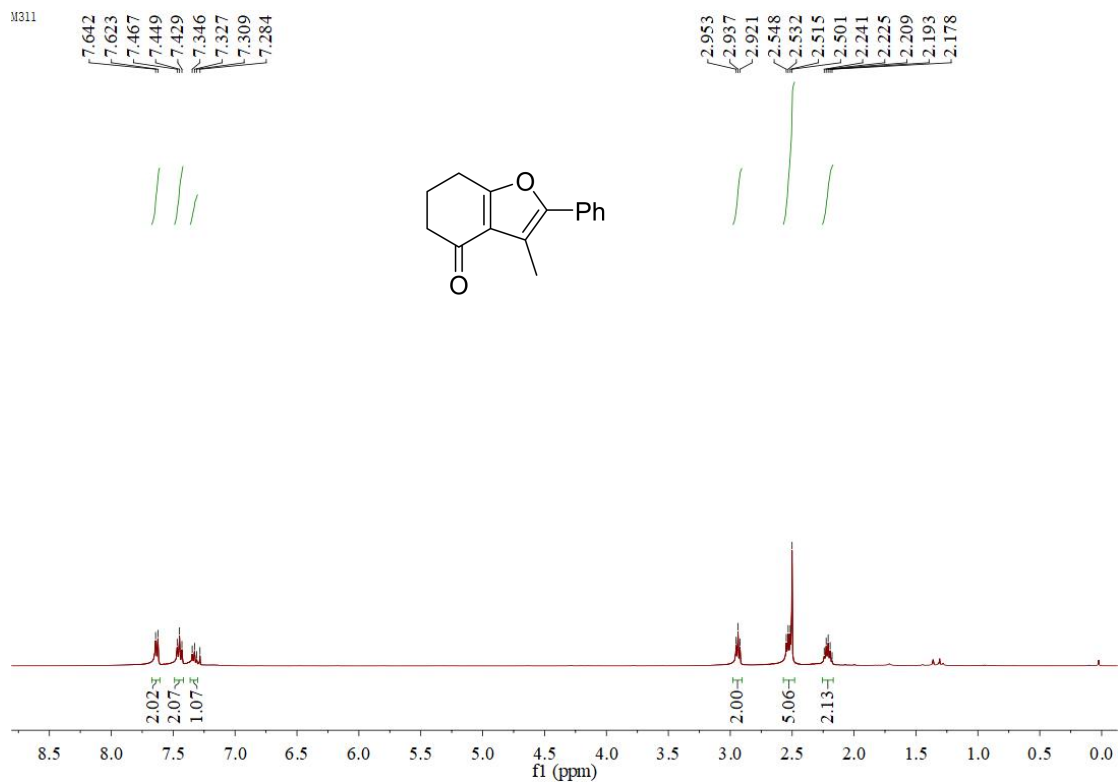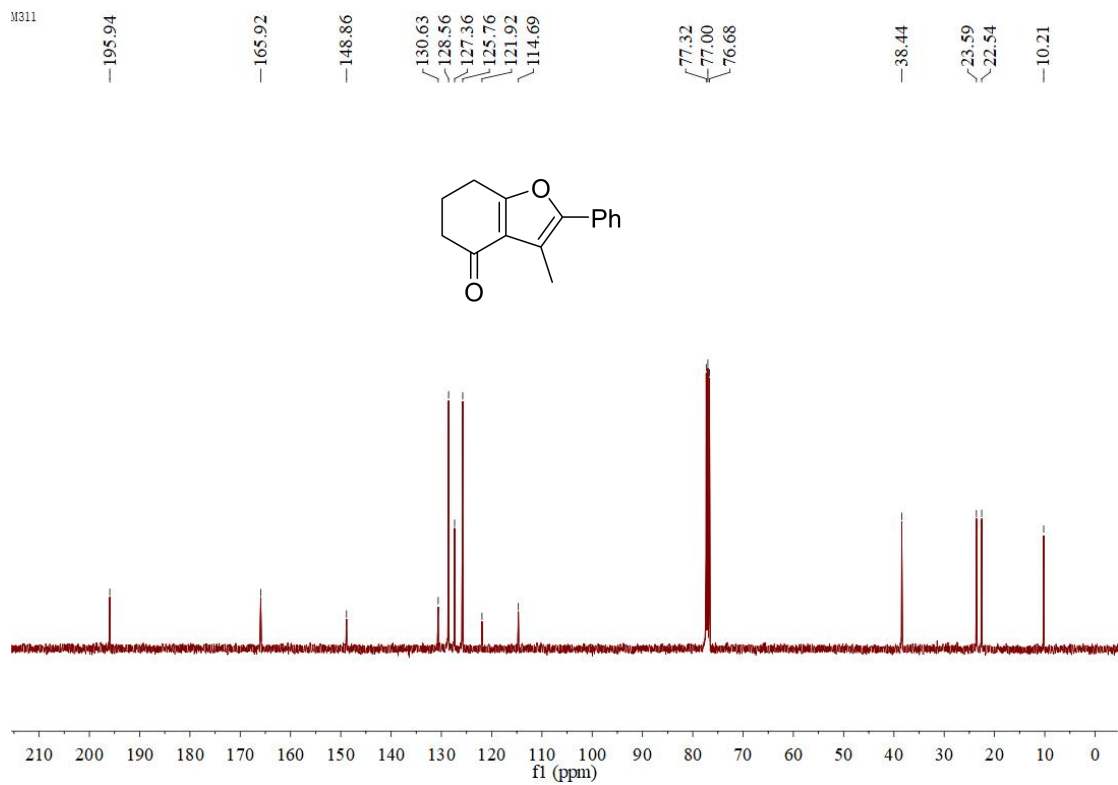



# <sup>1</sup>H NMR and <sup>13</sup>C NMR of 3z

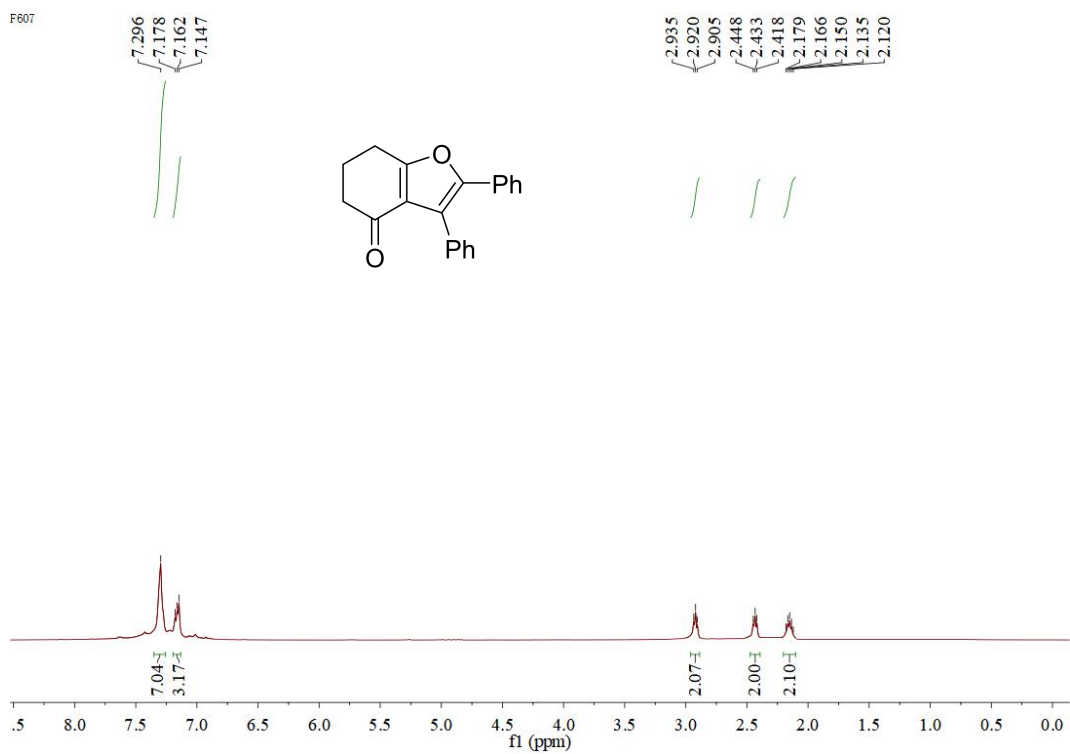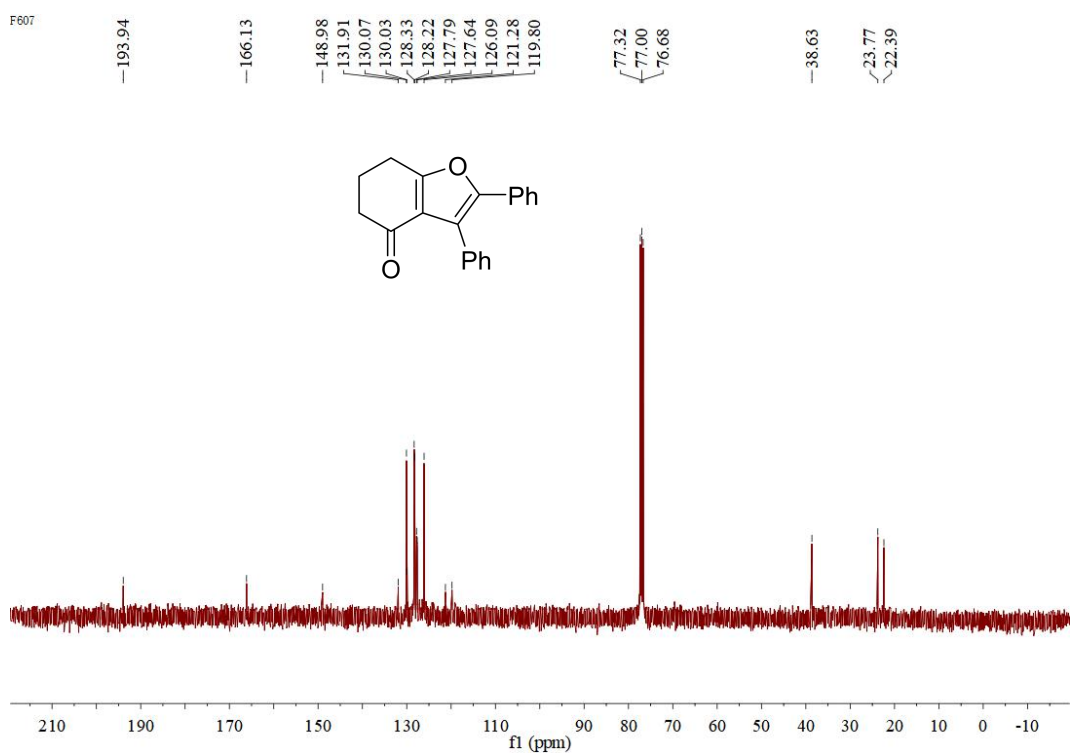

# <sup>1</sup>H NMR and <sup>13</sup>C NMR of 3aa

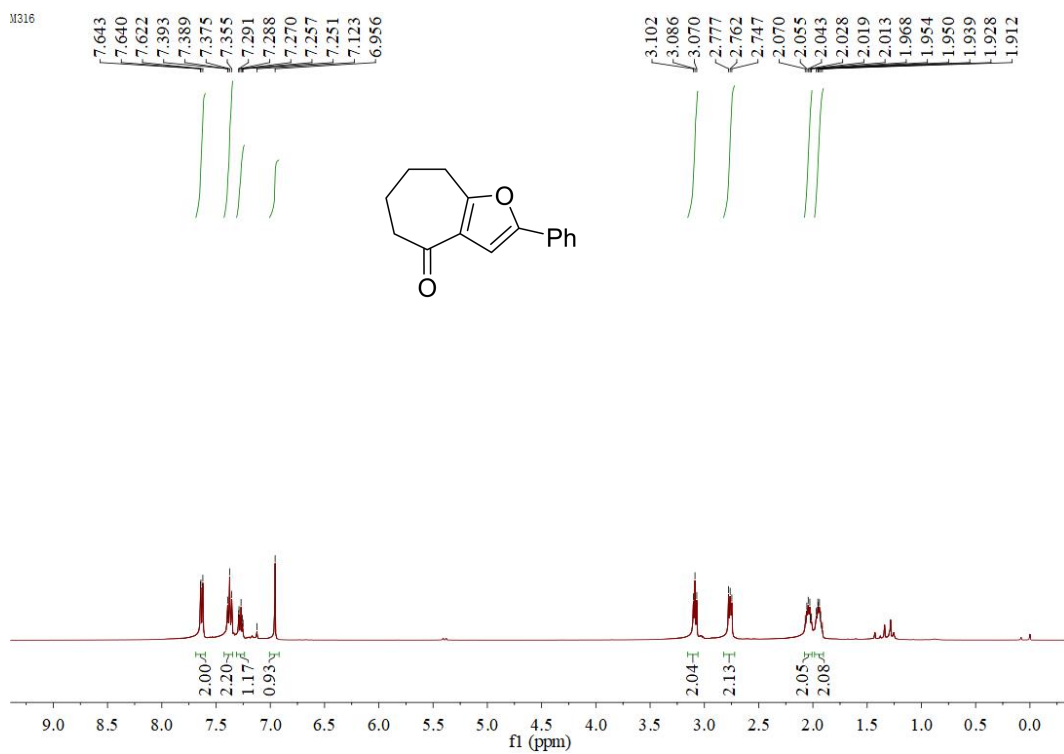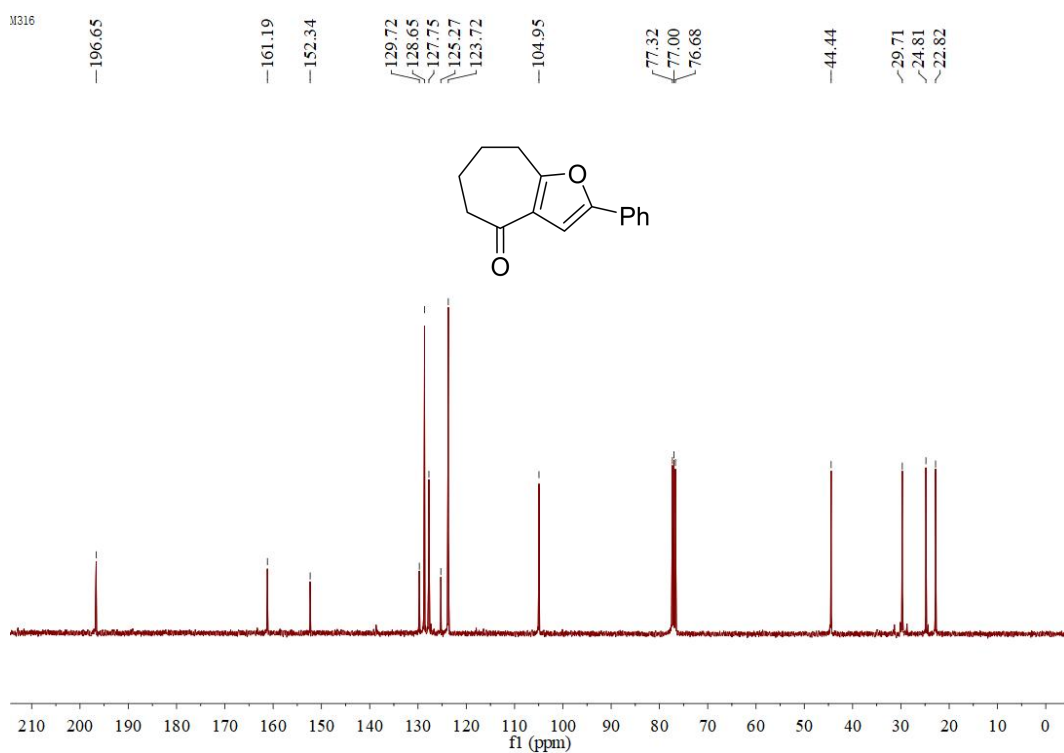

# <sup>1</sup>H NMR and <sup>13</sup>C NMR of 3ab

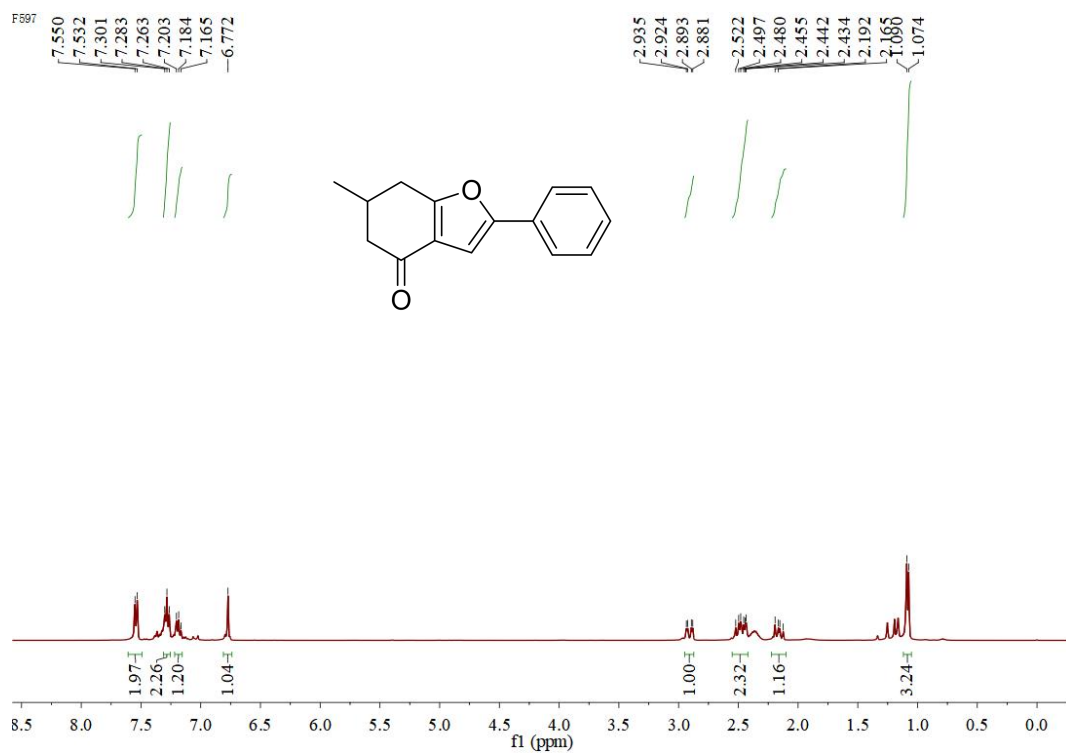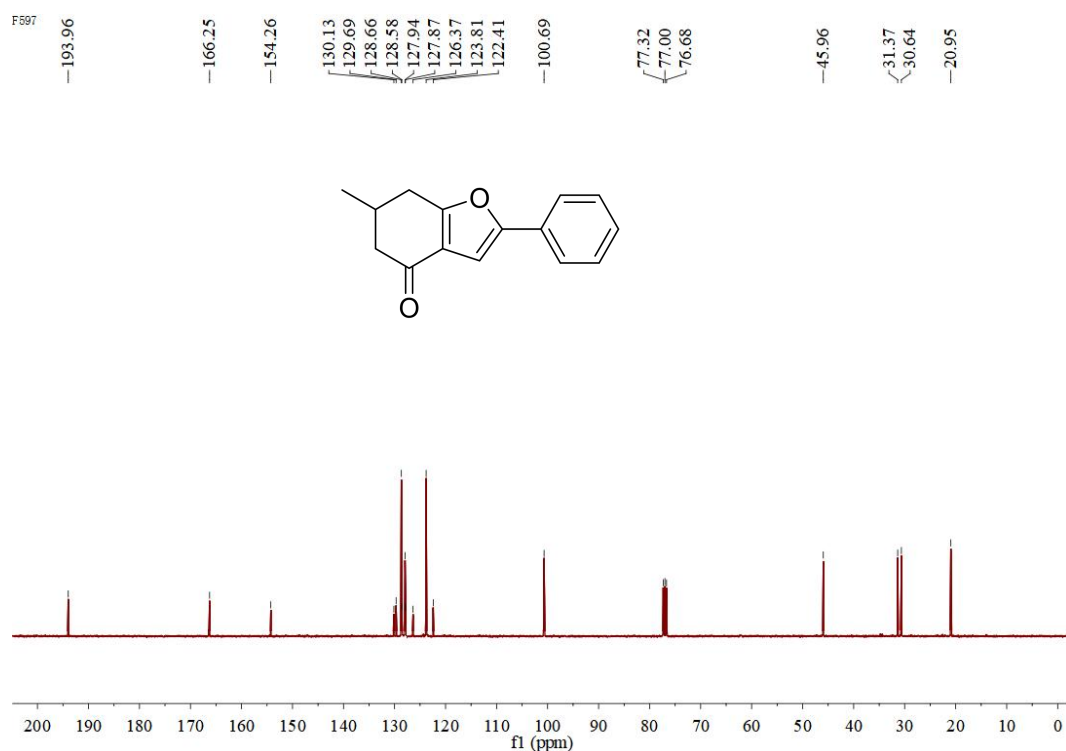

# <sup>1</sup>H NMR and <sup>13</sup>C NMR of 3ac

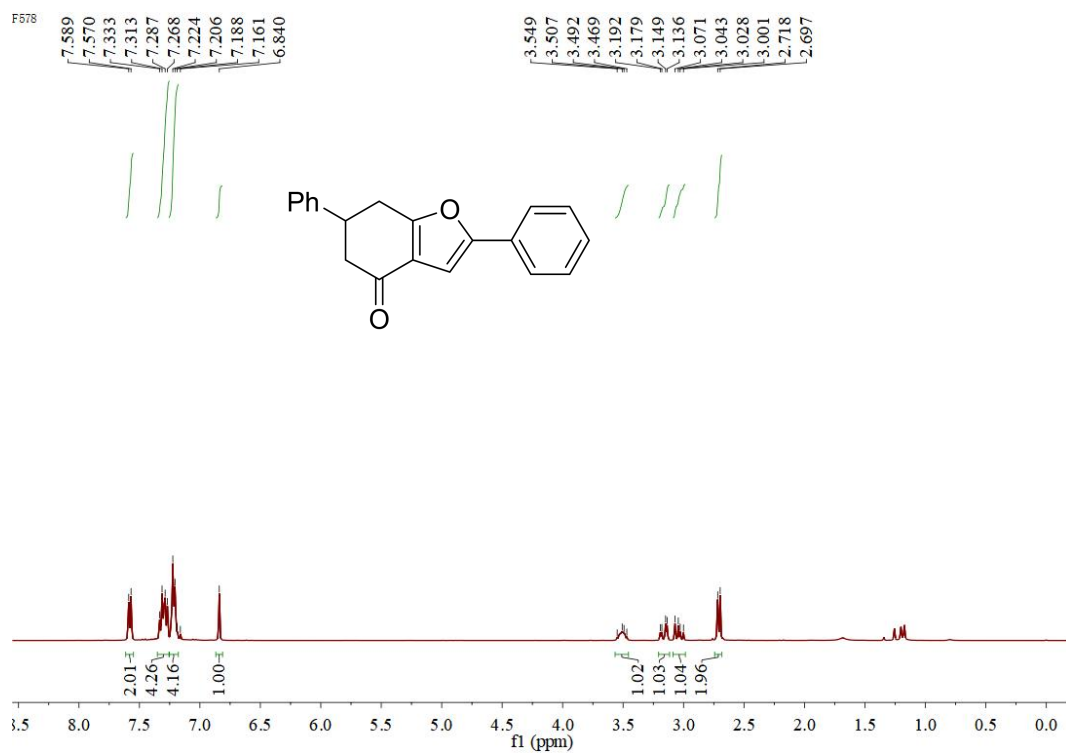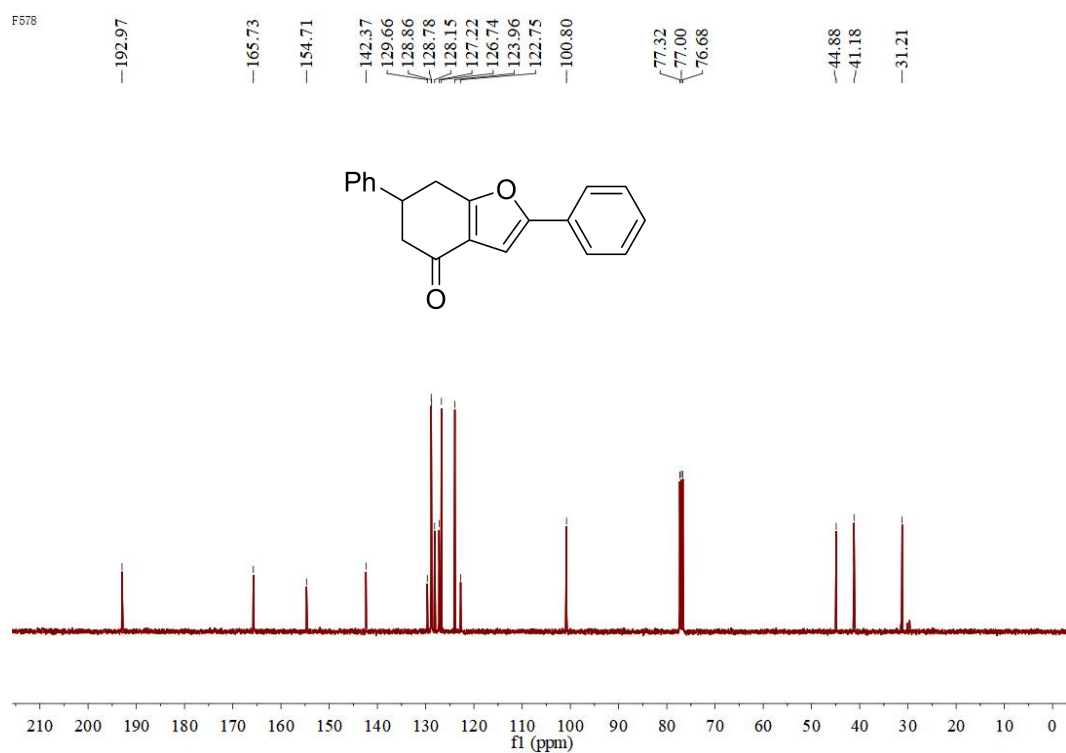

# <sup>1</sup>H NMR and <sup>13</sup>C NMR of 3ad'

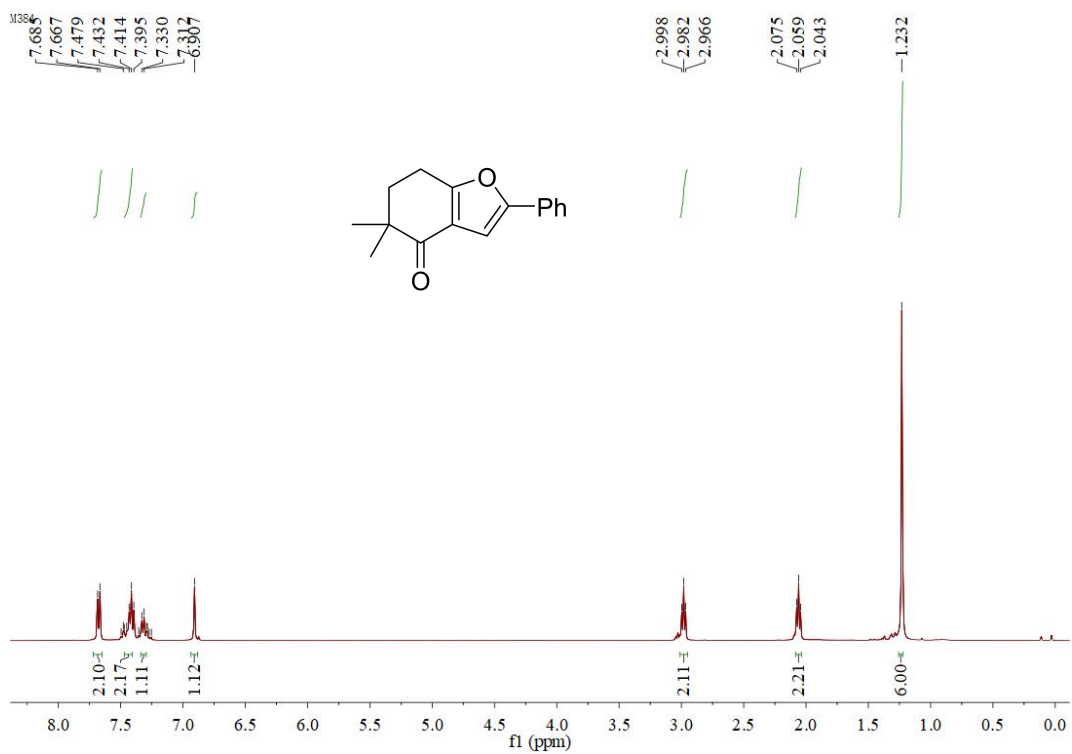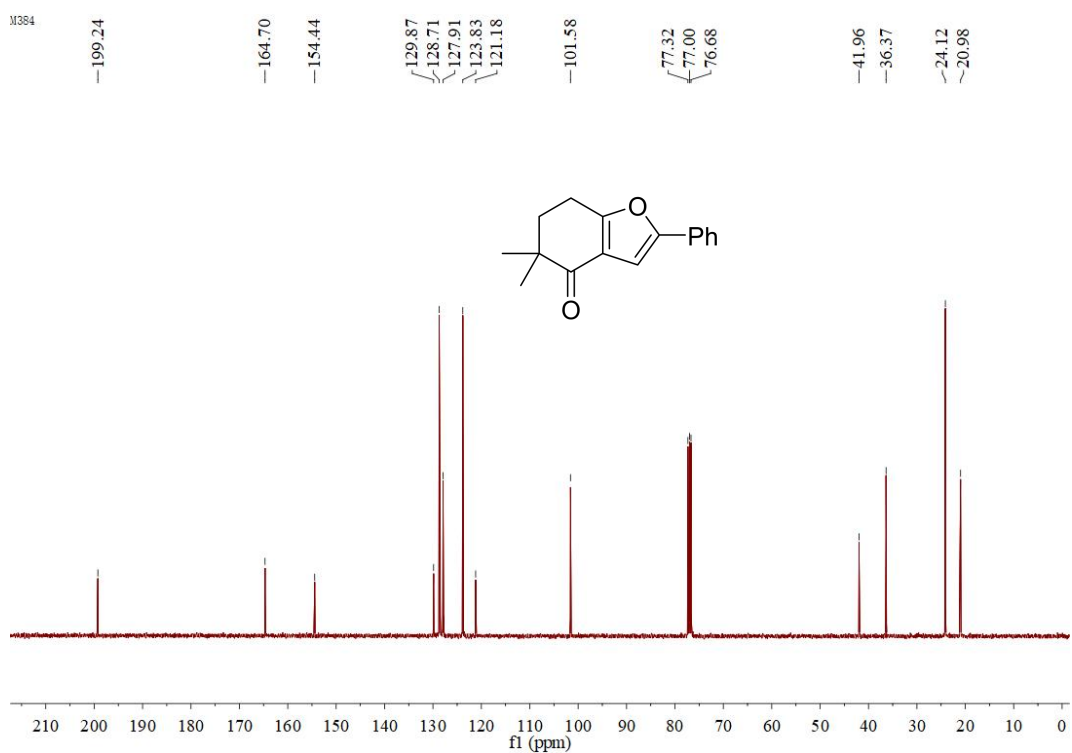

# <sup>1</sup>H NMR and <sup>13</sup>C NMR of 3ad''

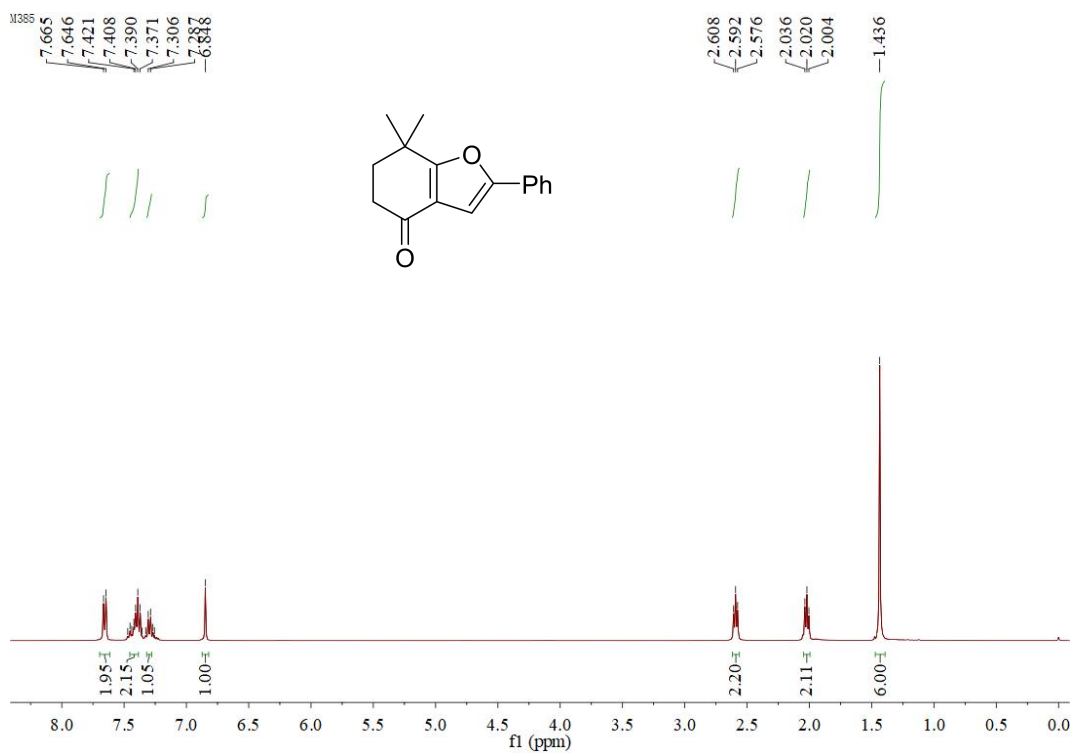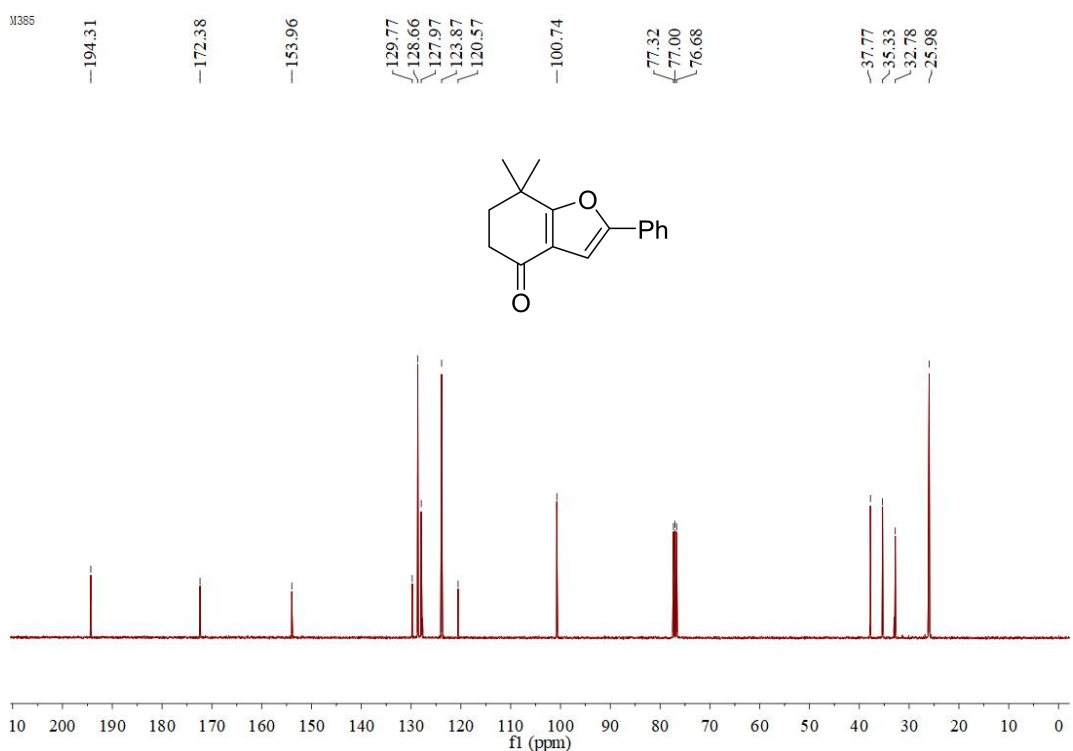

# <sup>1</sup>H NMR and <sup>13</sup>C NMR of 4a

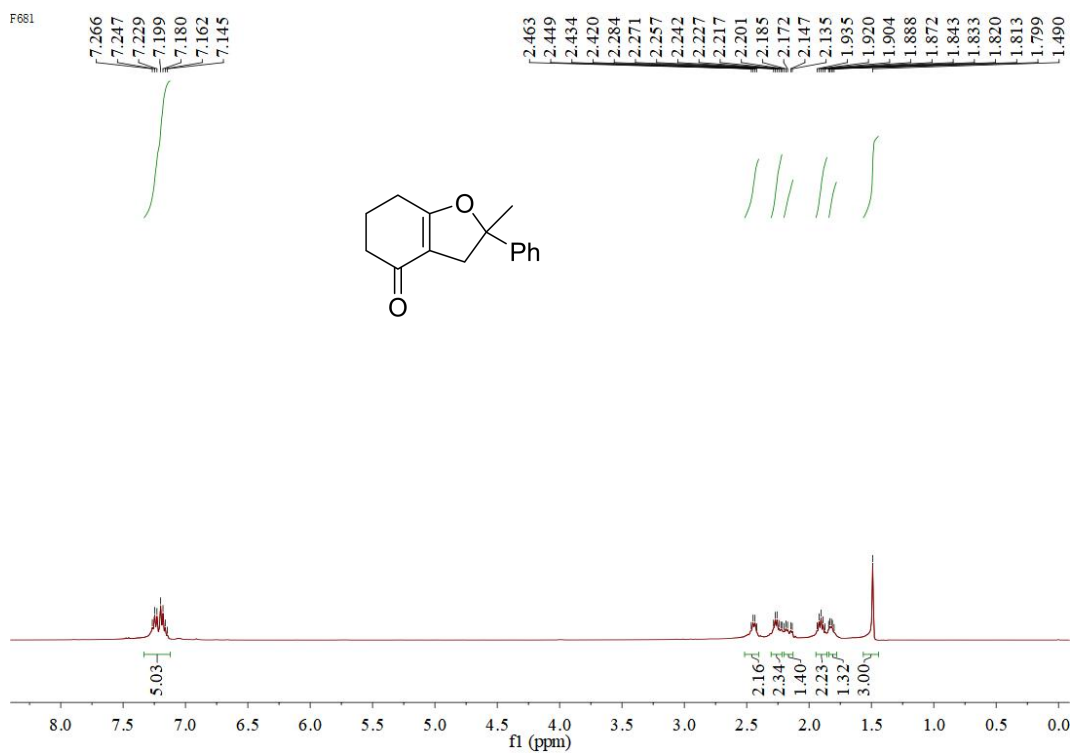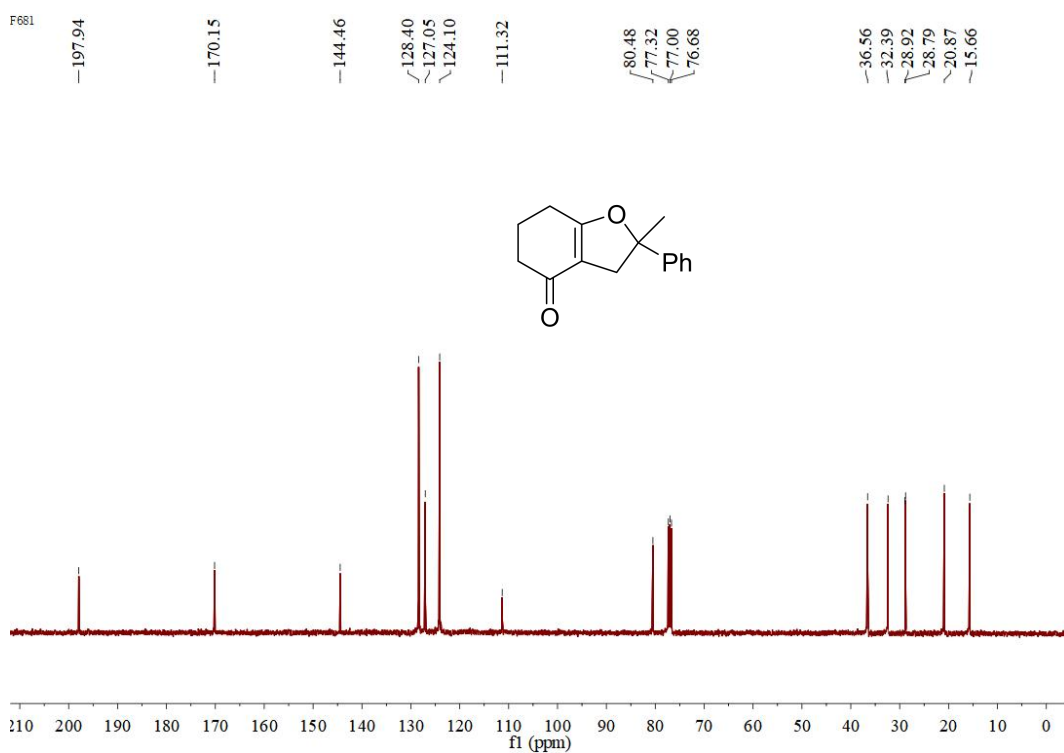

# <sup>1</sup>H NMR and <sup>13</sup>C NMR of 4b

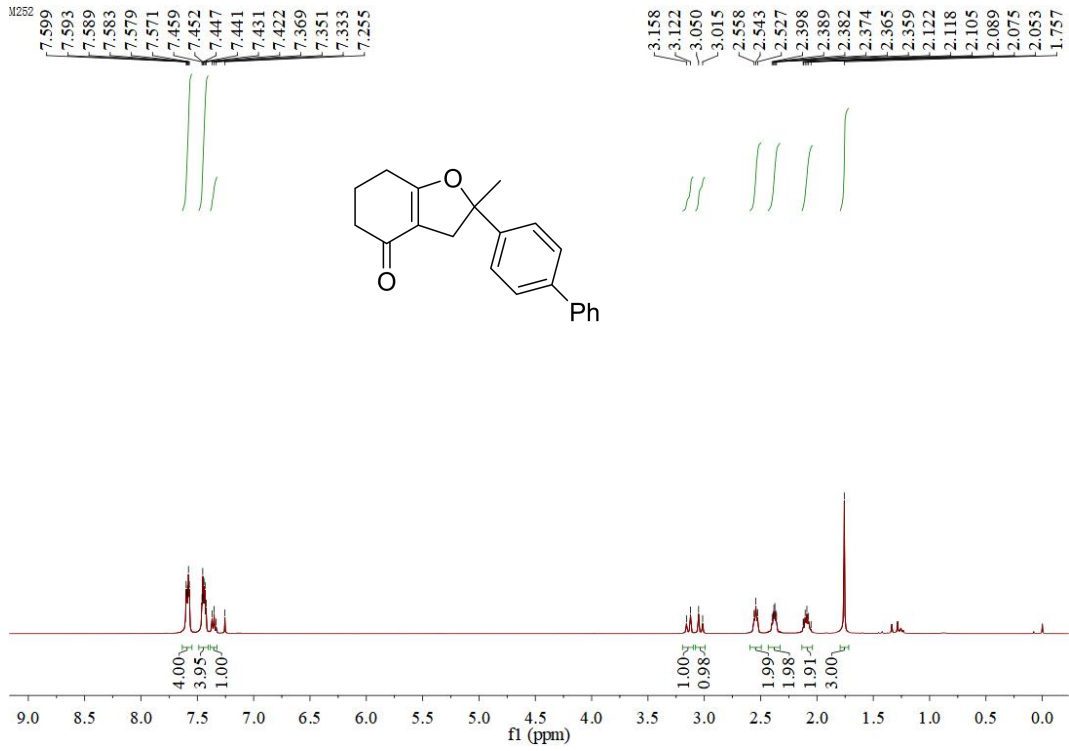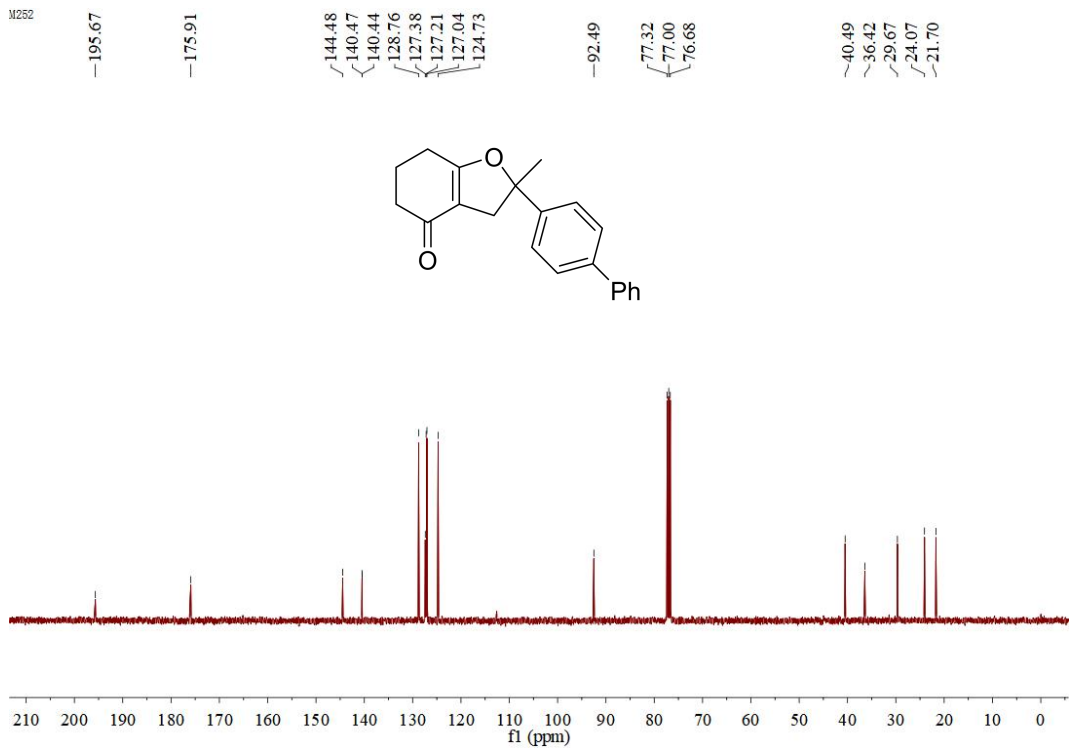



# <sup>1</sup>H NMR and <sup>13</sup>C NMR of 4c

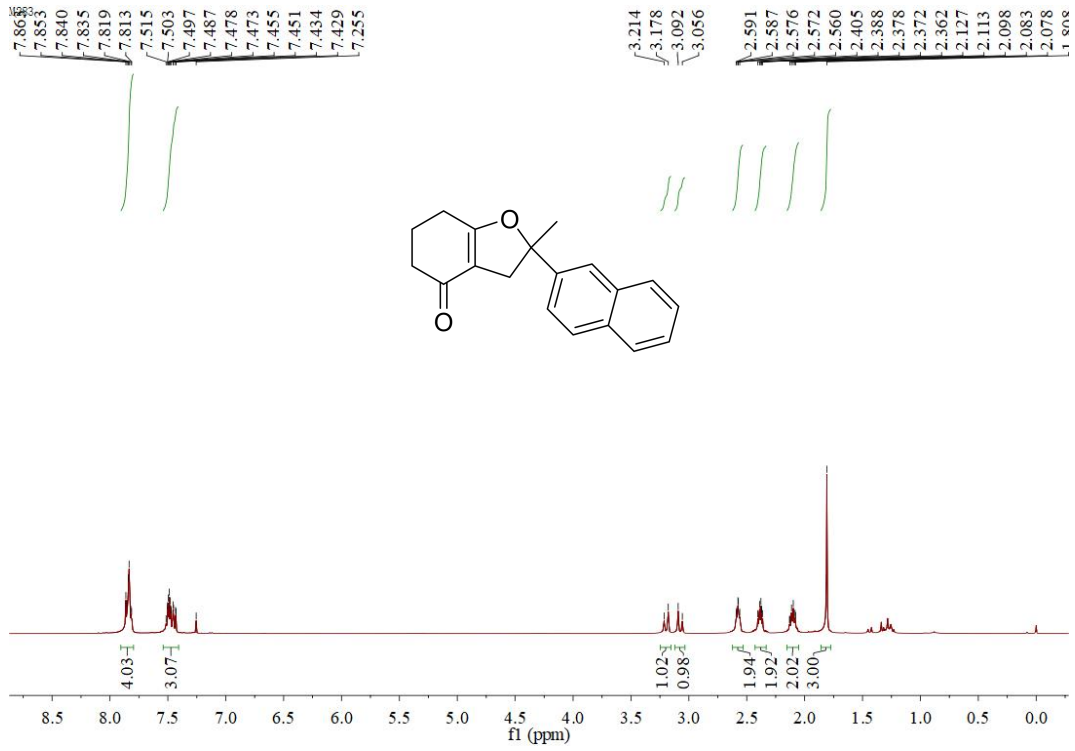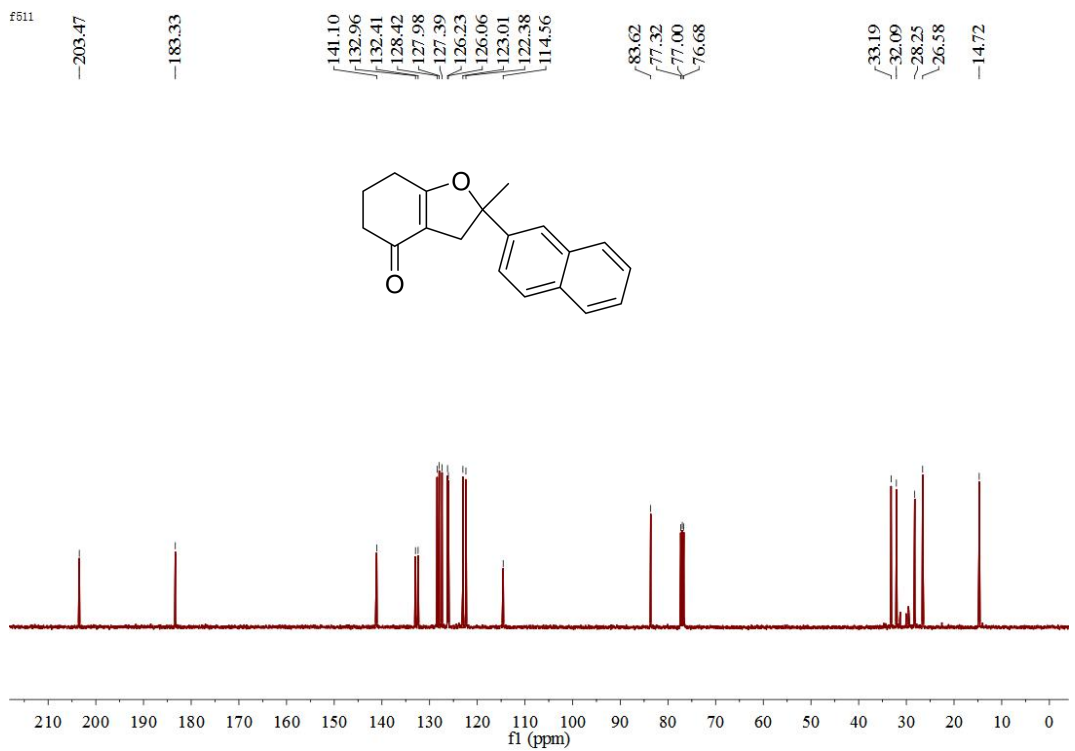

# <sup>1</sup>H NMR and <sup>13</sup>C NMR of 4d

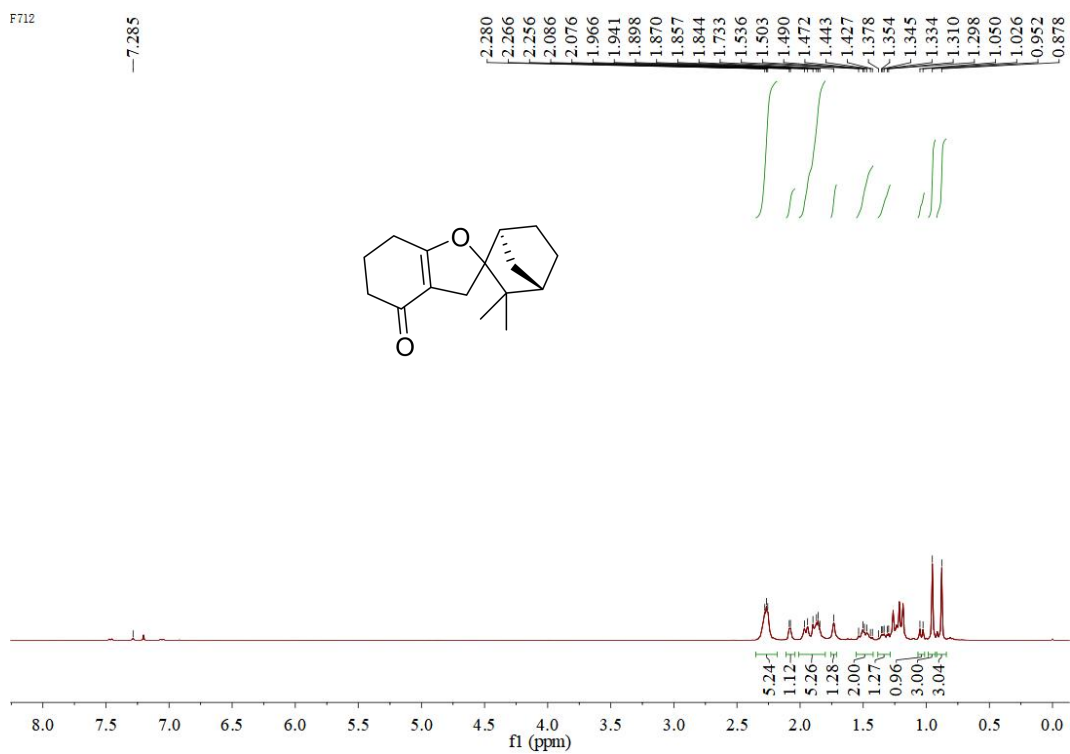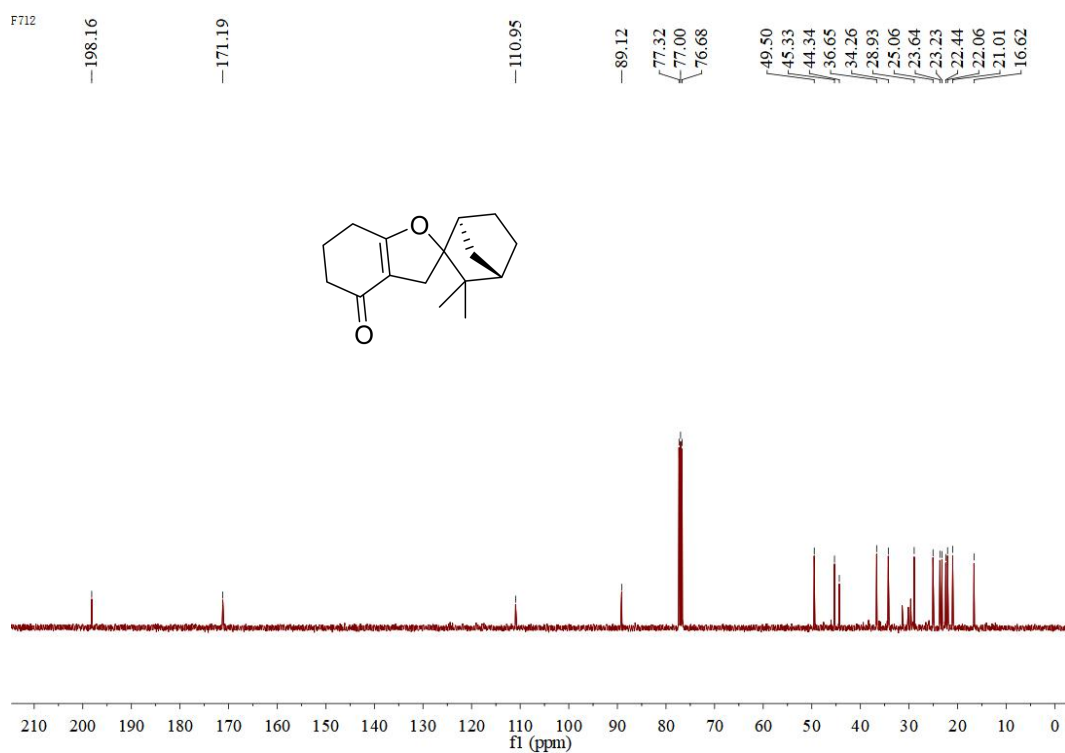

# <sup>1</sup>H NMR and <sup>13</sup>C NMR of 4e

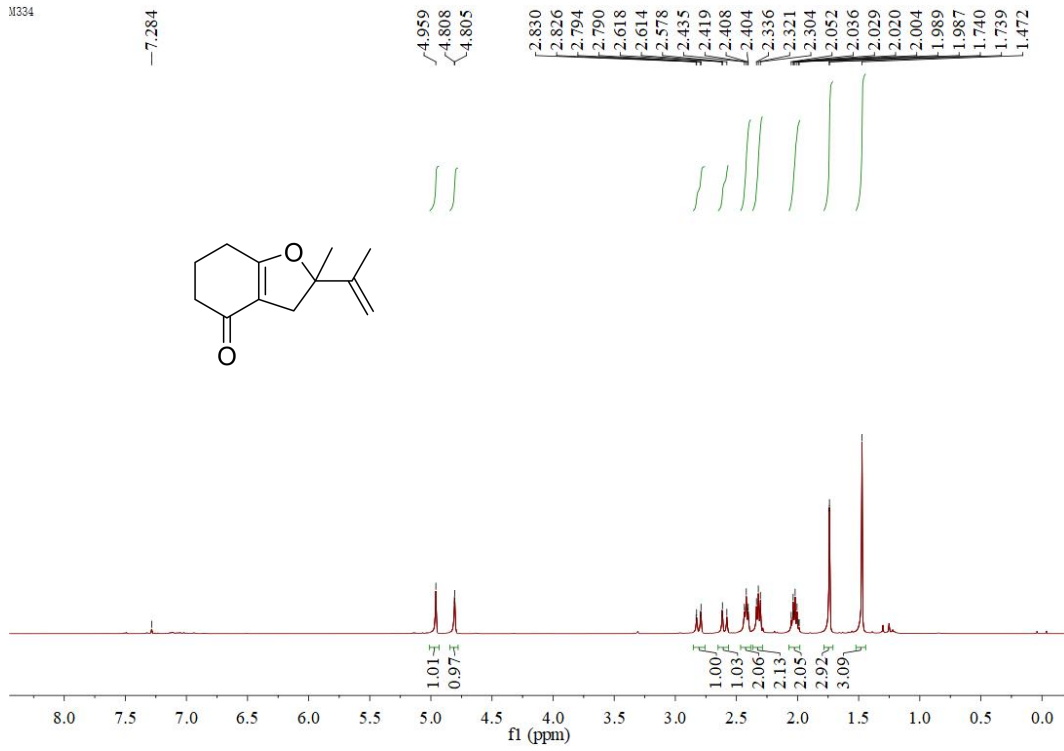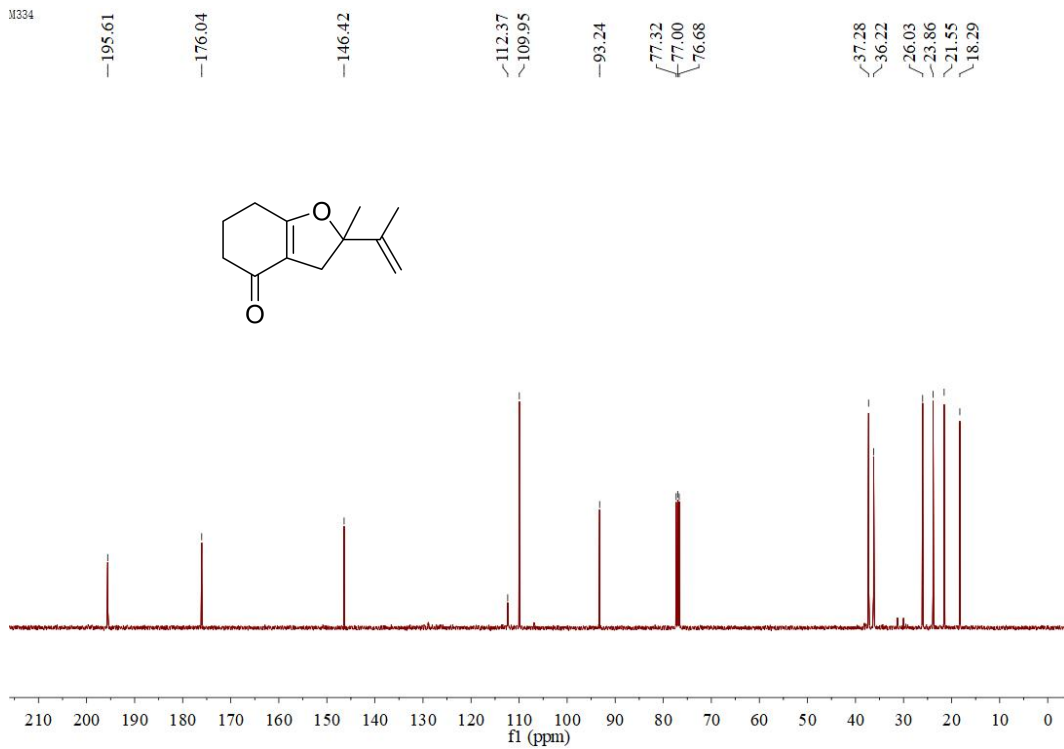

# <sup>1</sup>H NMR and <sup>13</sup>C NMR of 4f

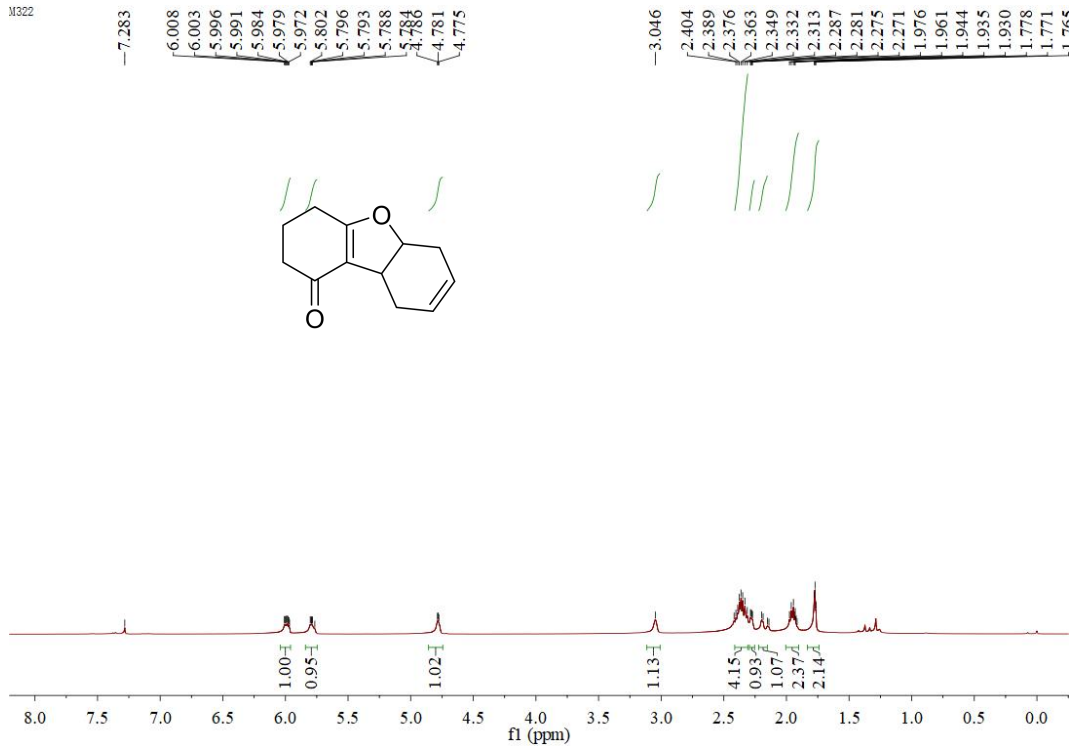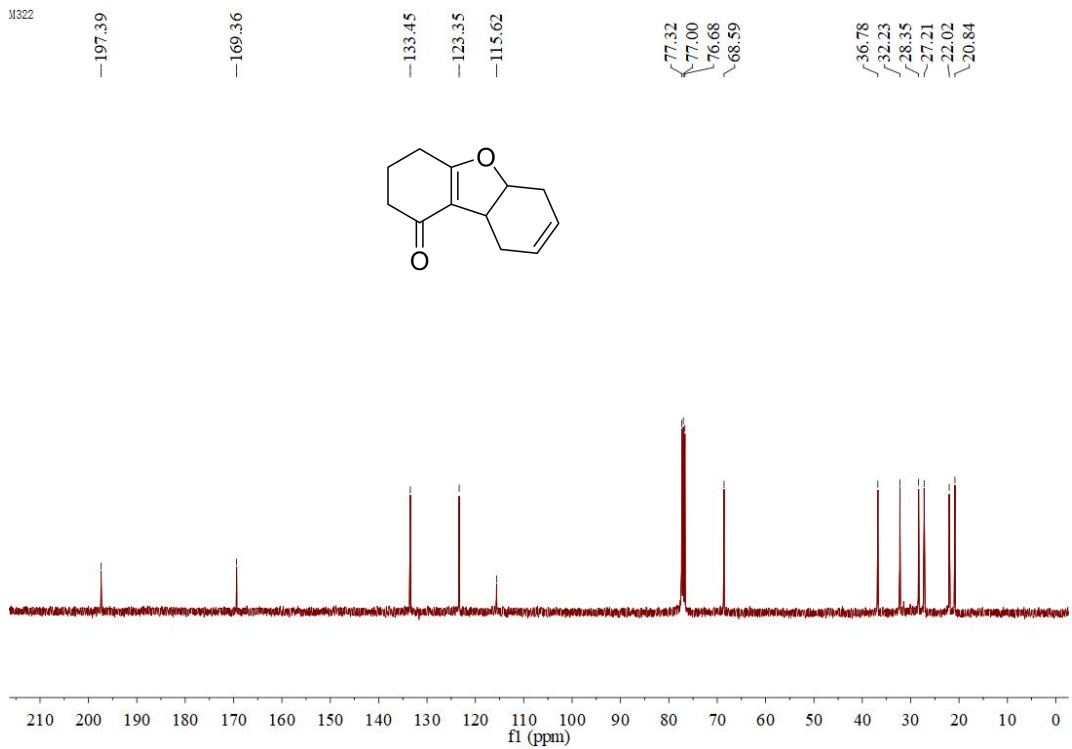

# <sup>1</sup>H NMR and <sup>13</sup>C NMR of 4g

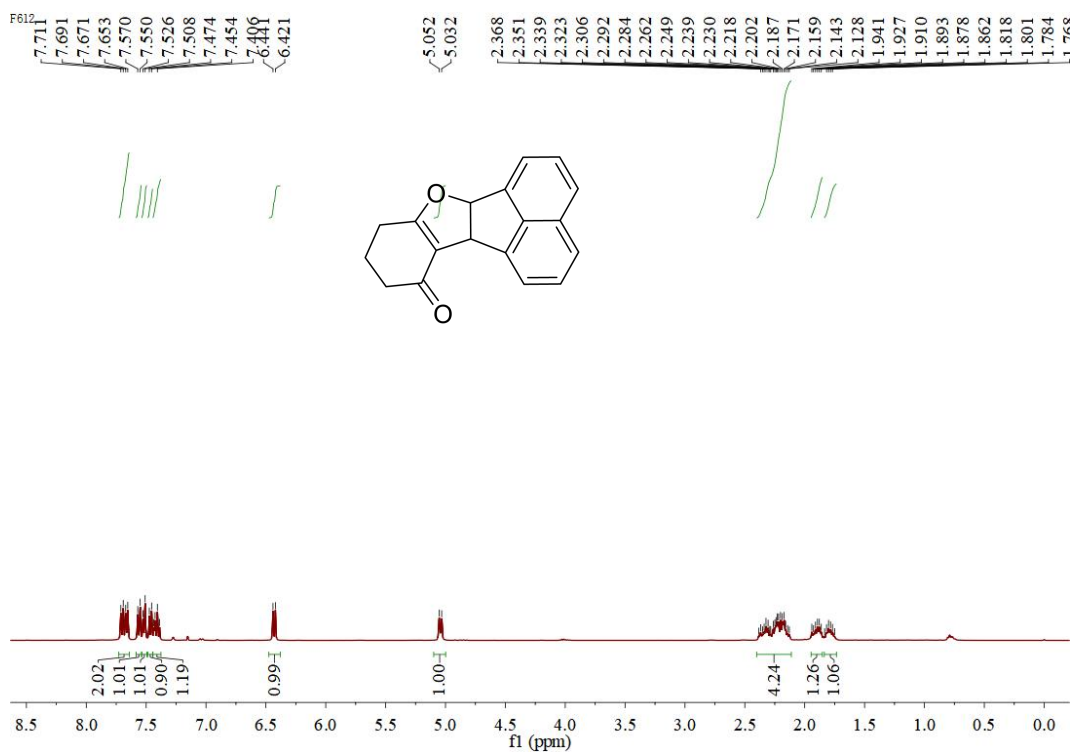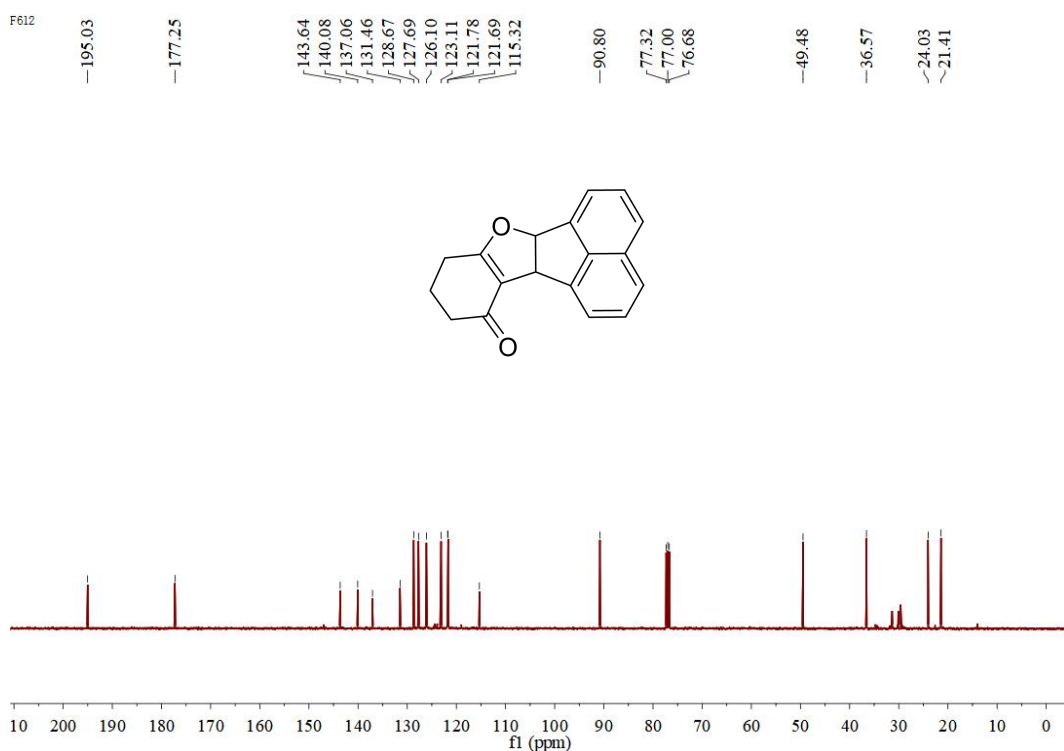

# <sup>1</sup>H NMR and <sup>13</sup>C NMR of 4h

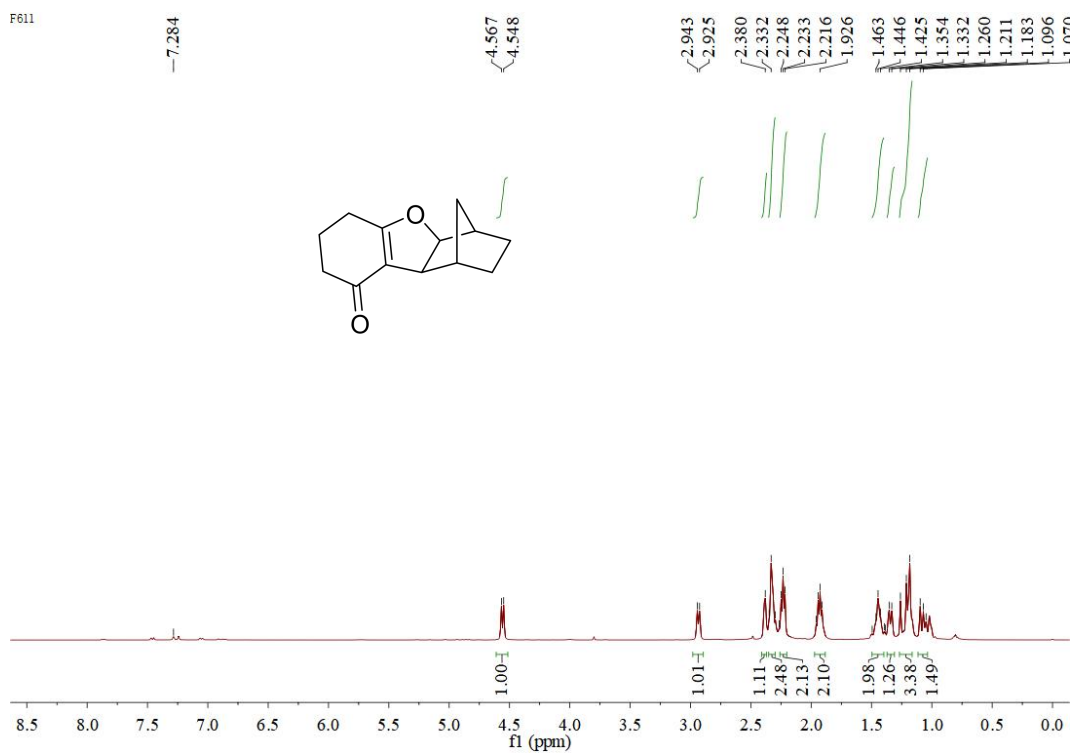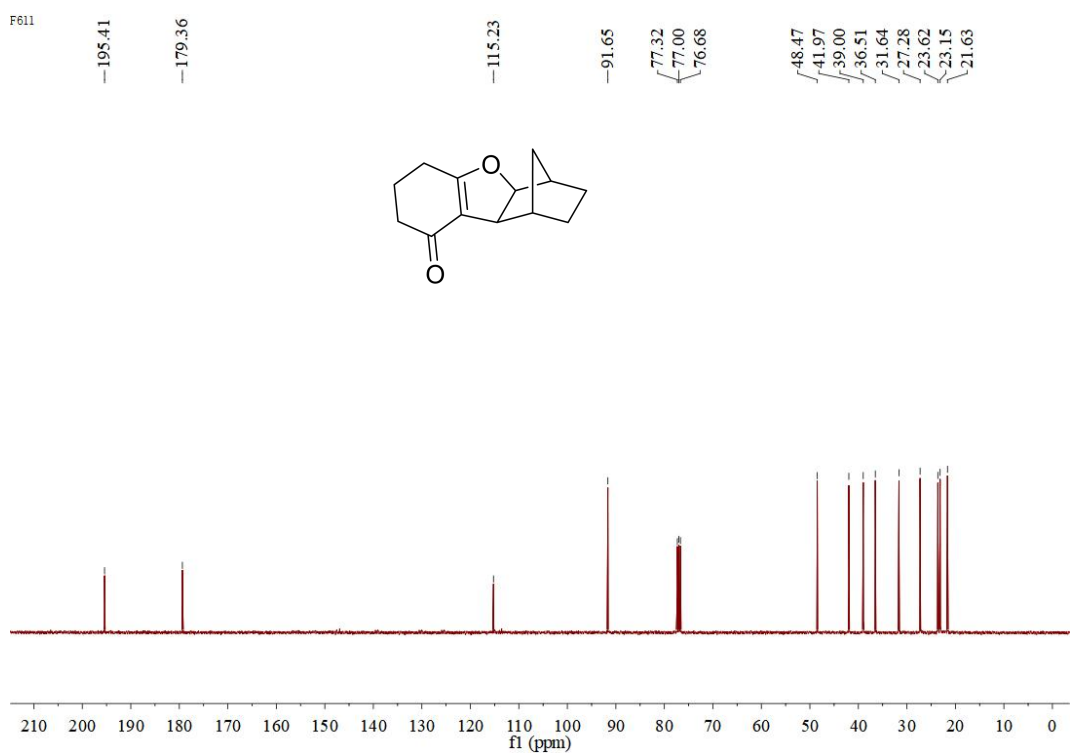

# <sup>1</sup>H NMR and <sup>13</sup>C NMR of 4i

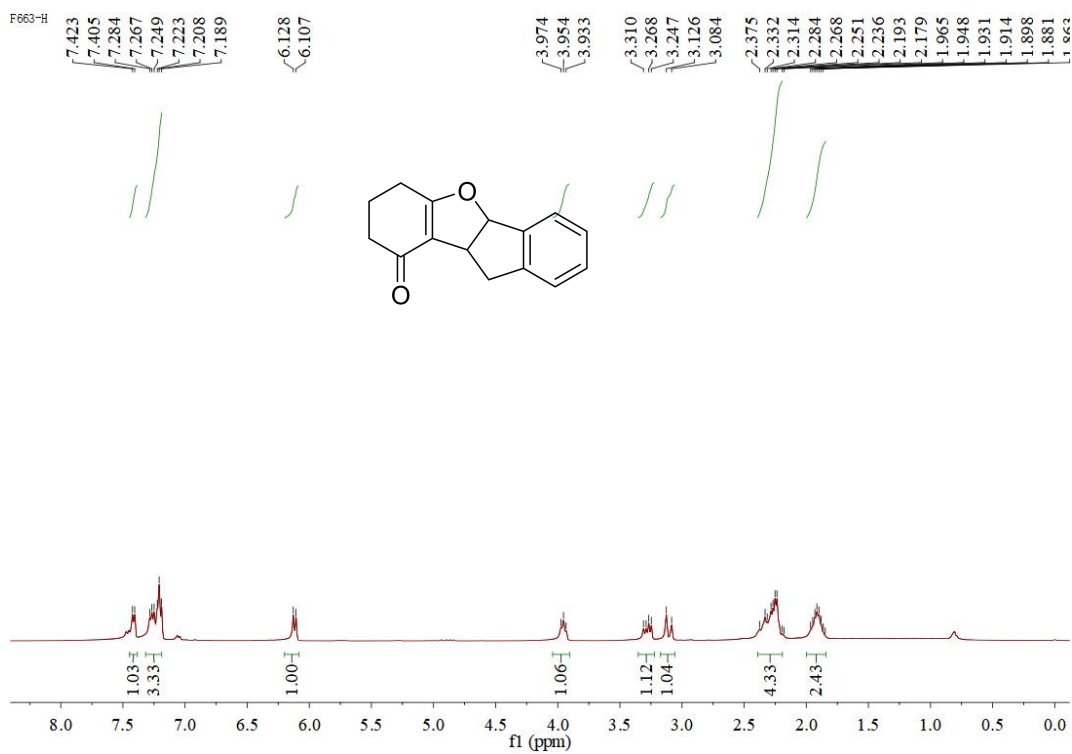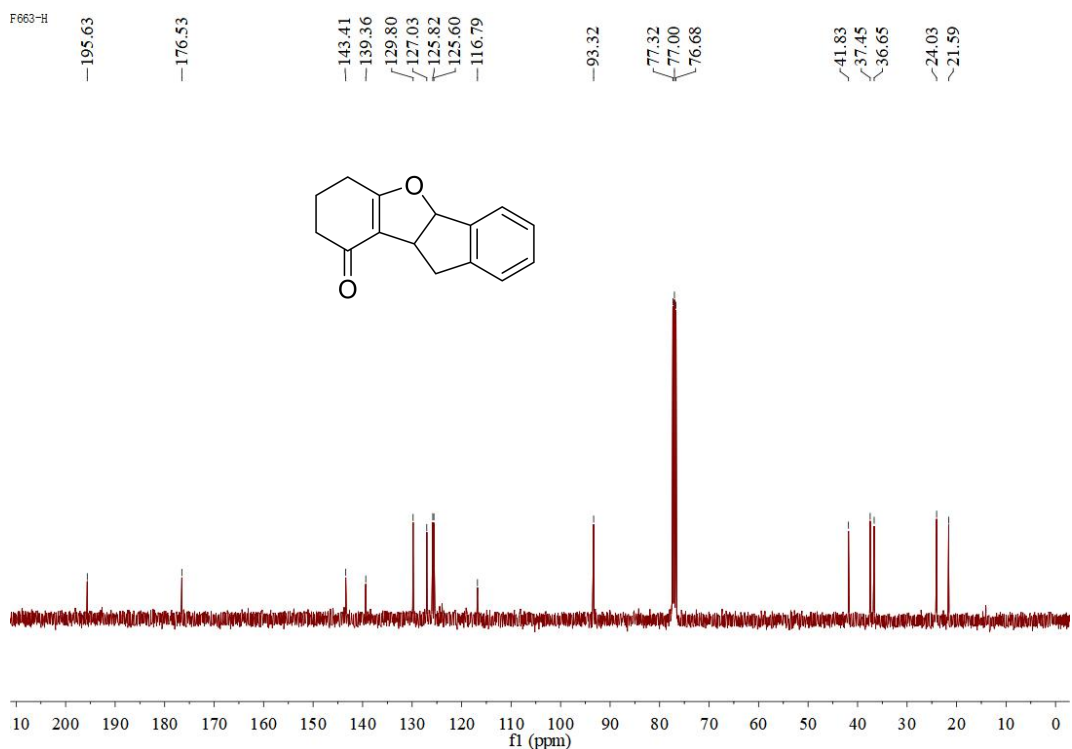

# <sup>1</sup>H NMR and <sup>13</sup>C NMR of 4j

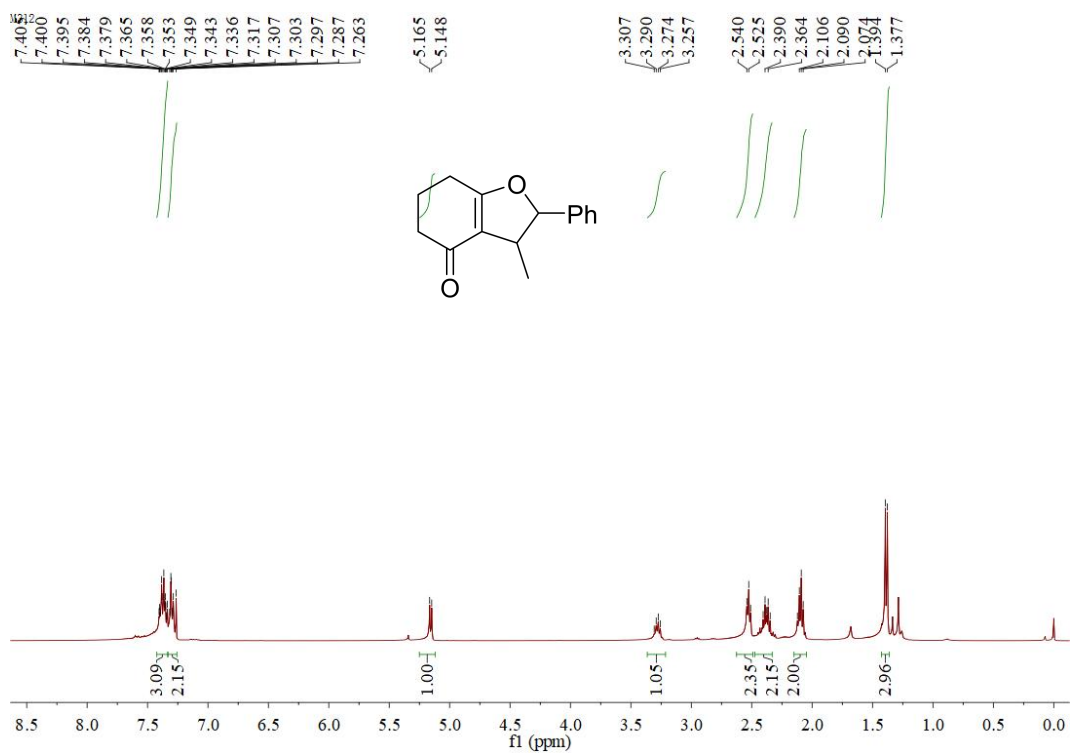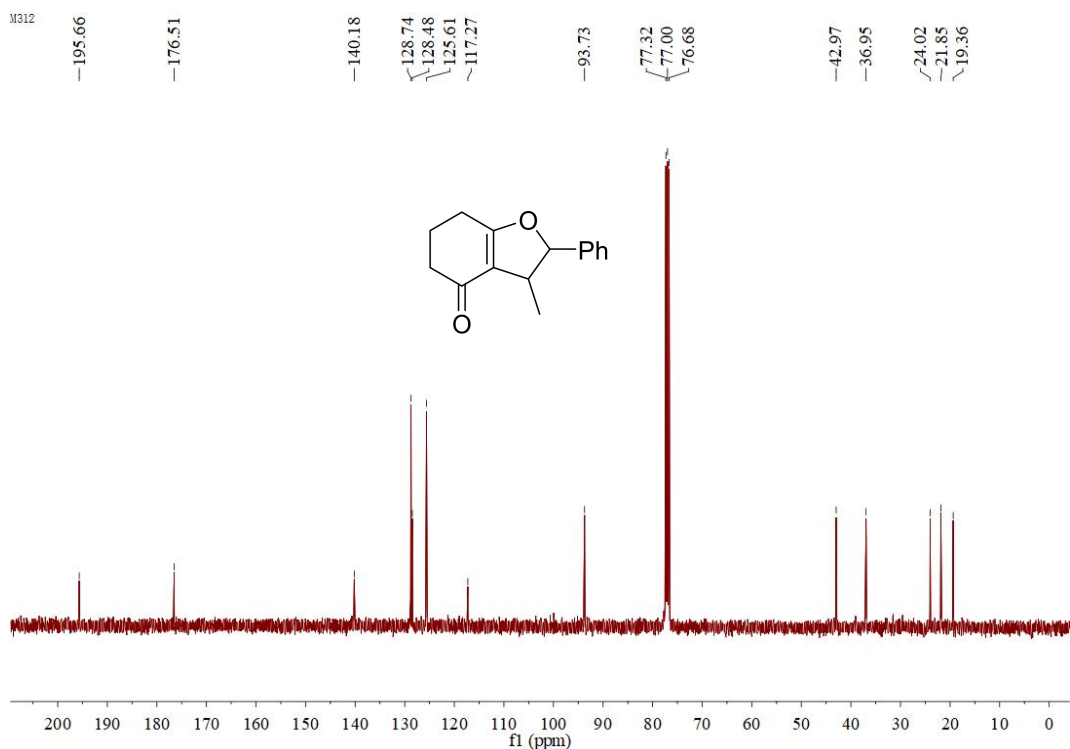



# <sup>1</sup>H NMR and <sup>13</sup>C NMR of 4k

M253

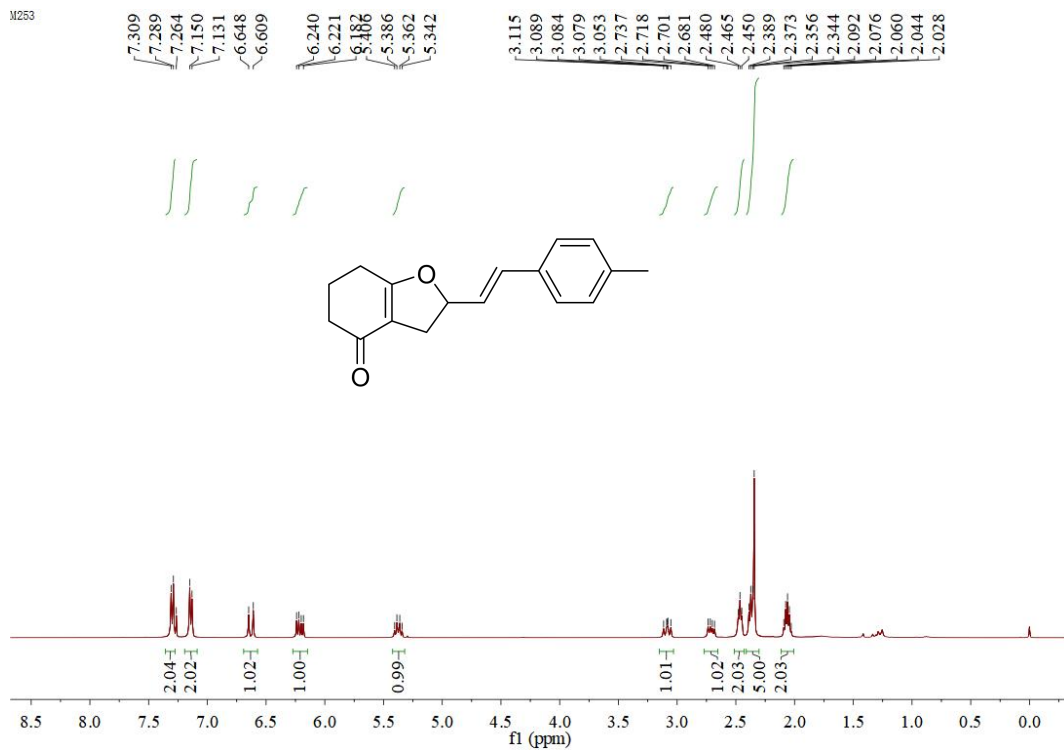

M253

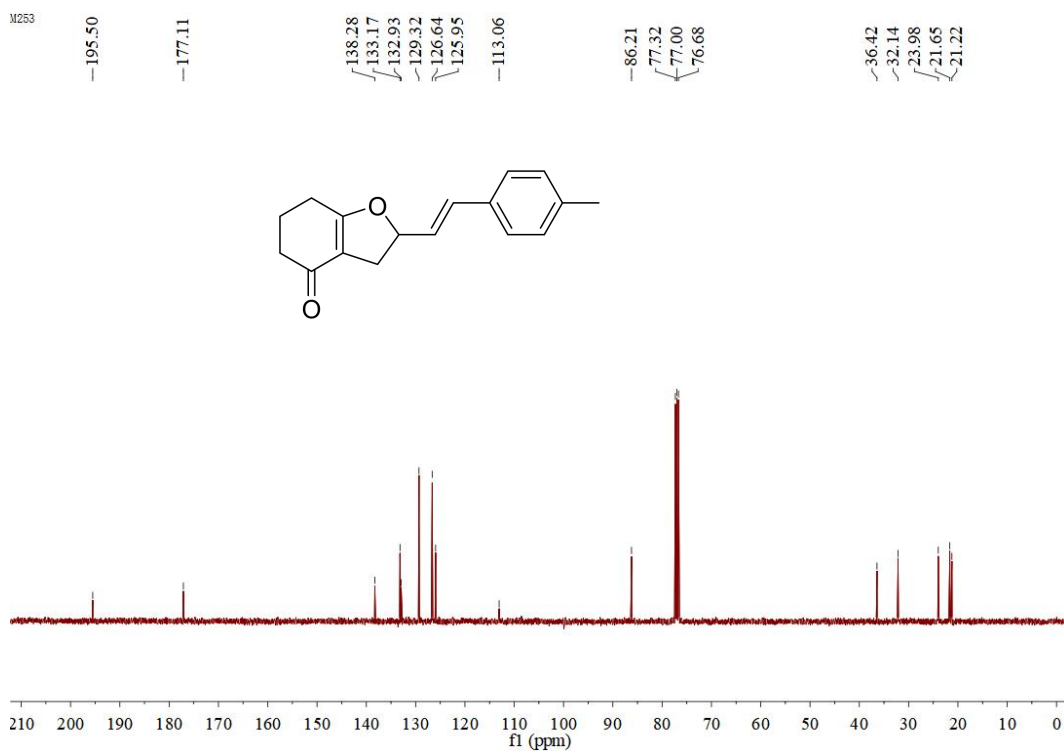

# <sup>1</sup>H NMR and <sup>13</sup>C NMR of 4l

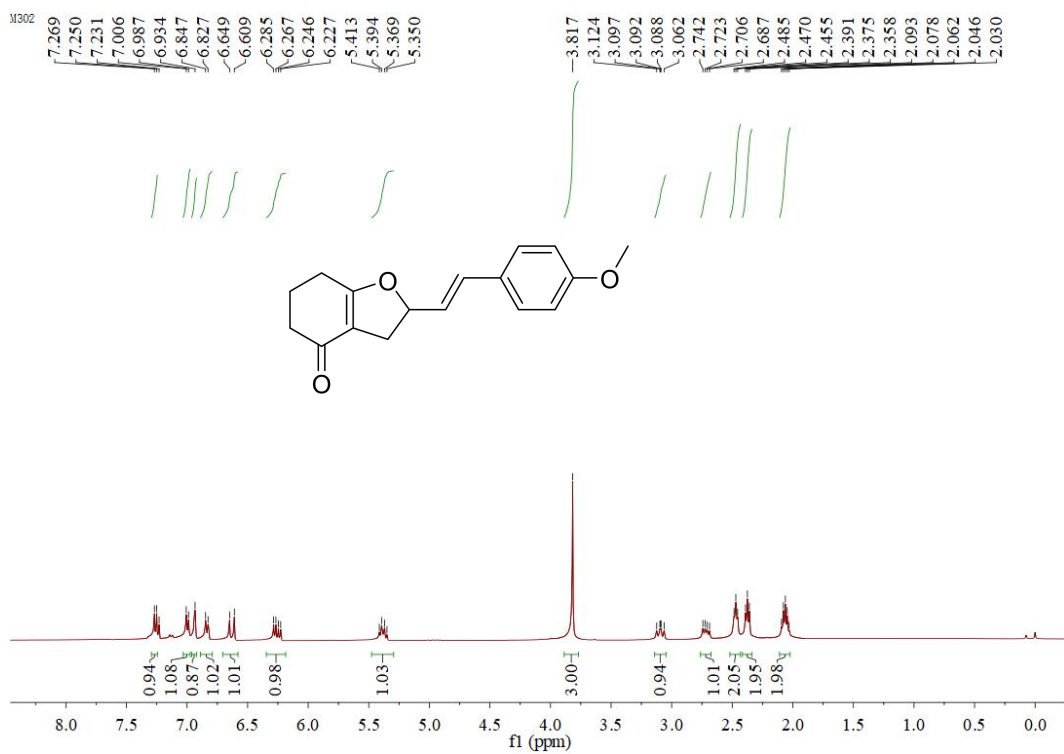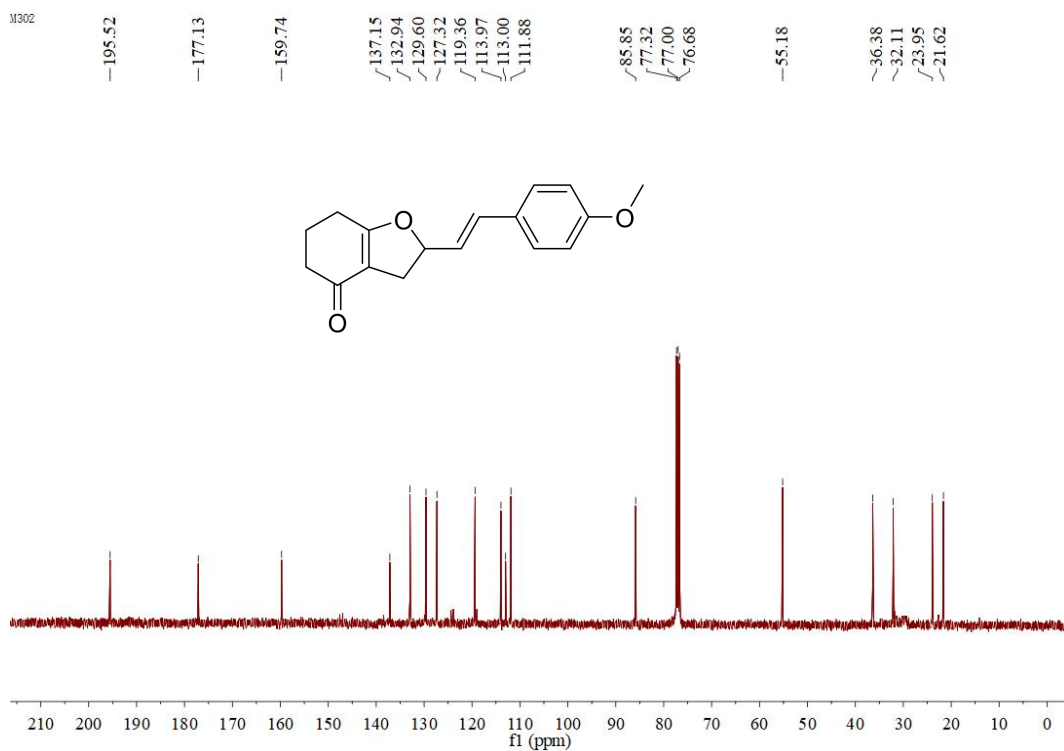

# <sup>1</sup>H NMR, <sup>13</sup>C NMR and <sup>19</sup>F NMR of 4m

M251

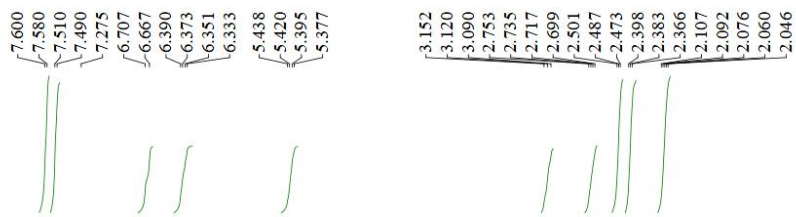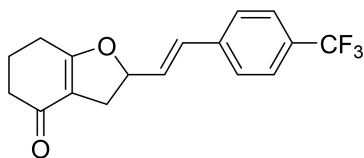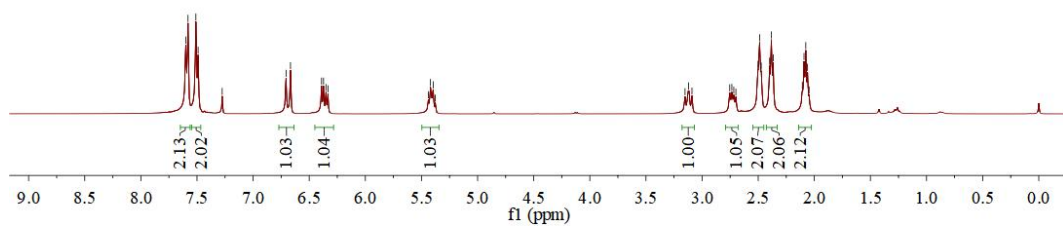

M251

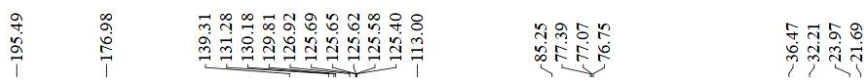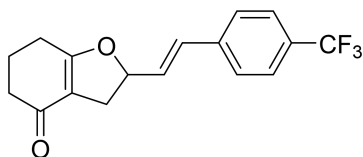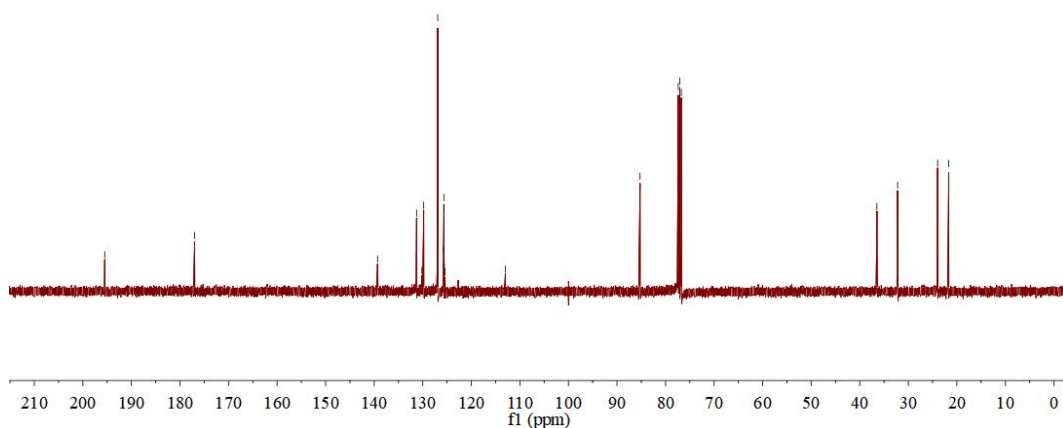

M251

-62.57

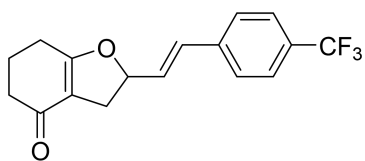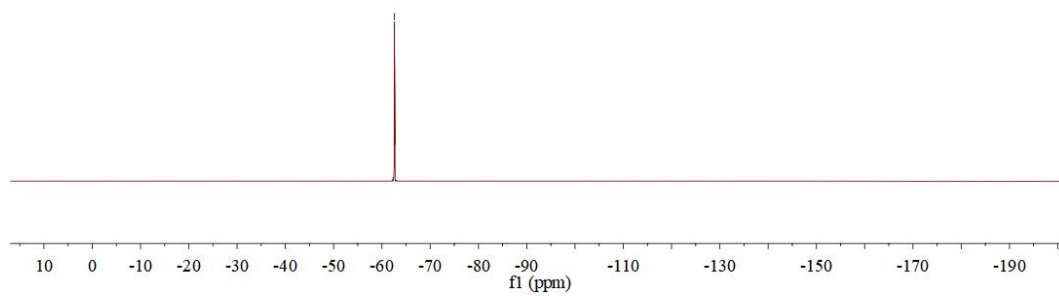

# <sup>1</sup>H NMR and <sup>13</sup>C NMR of 4n

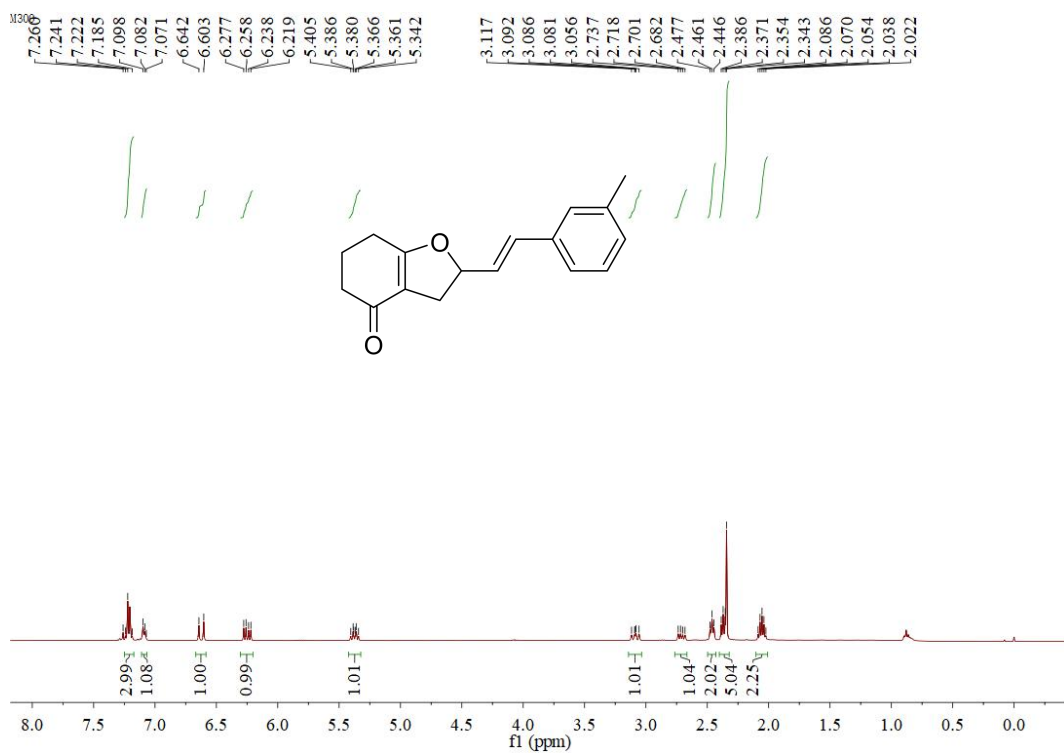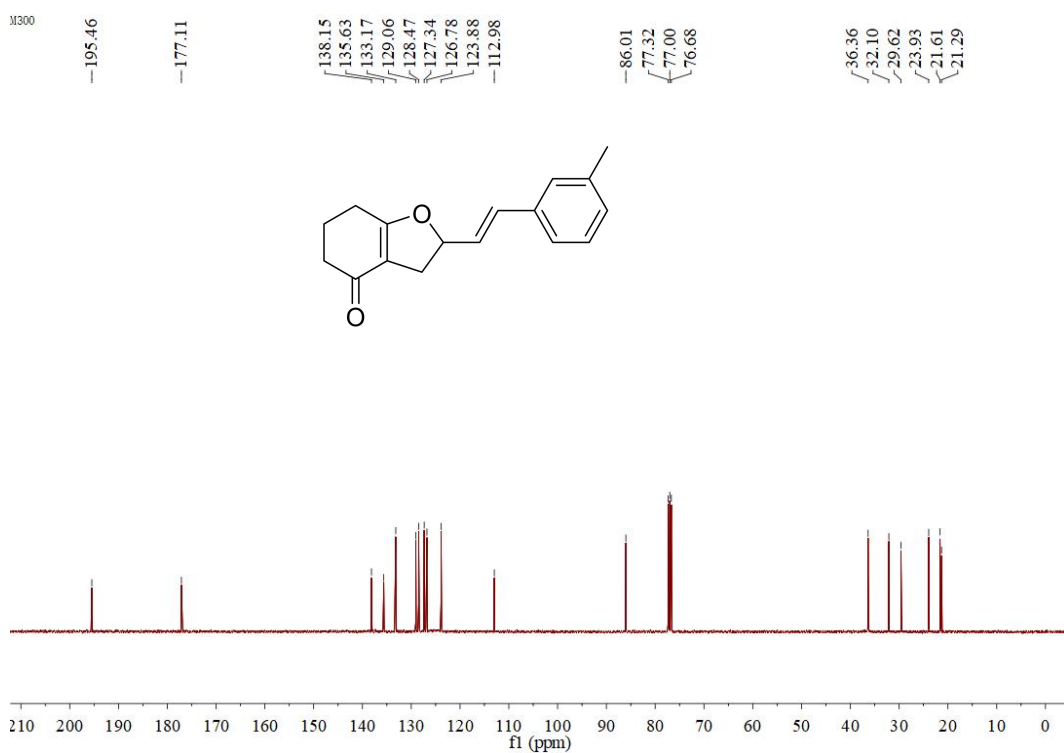

# <sup>1</sup>H NMR and <sup>13</sup>C NMR of 5a

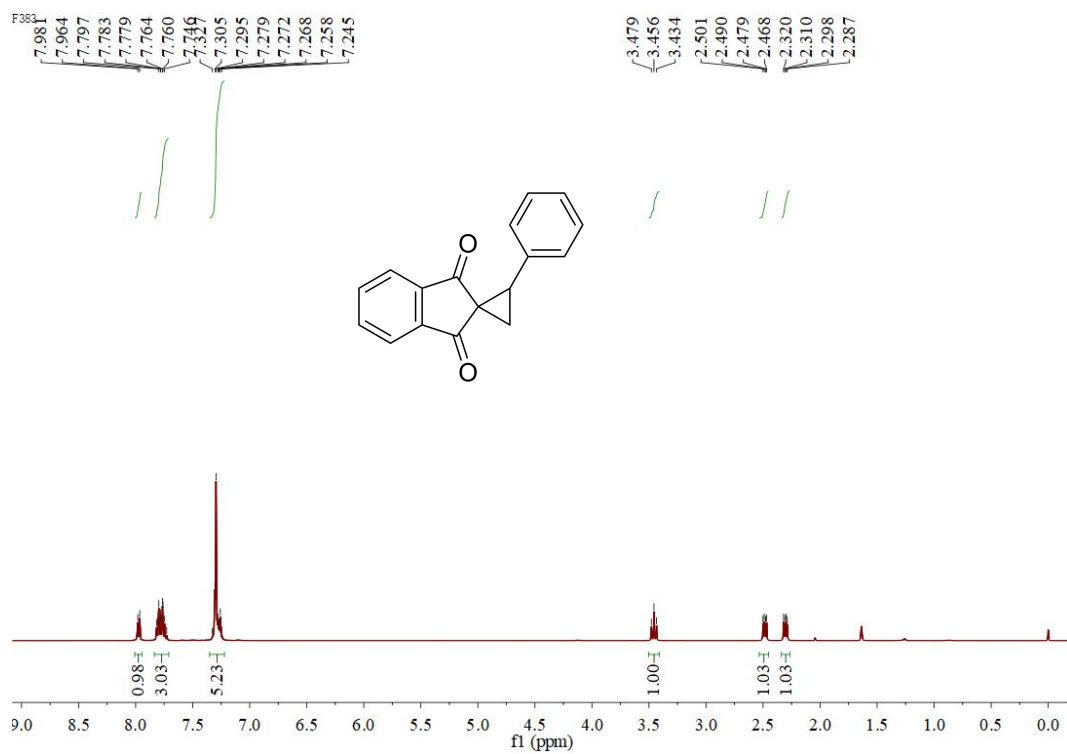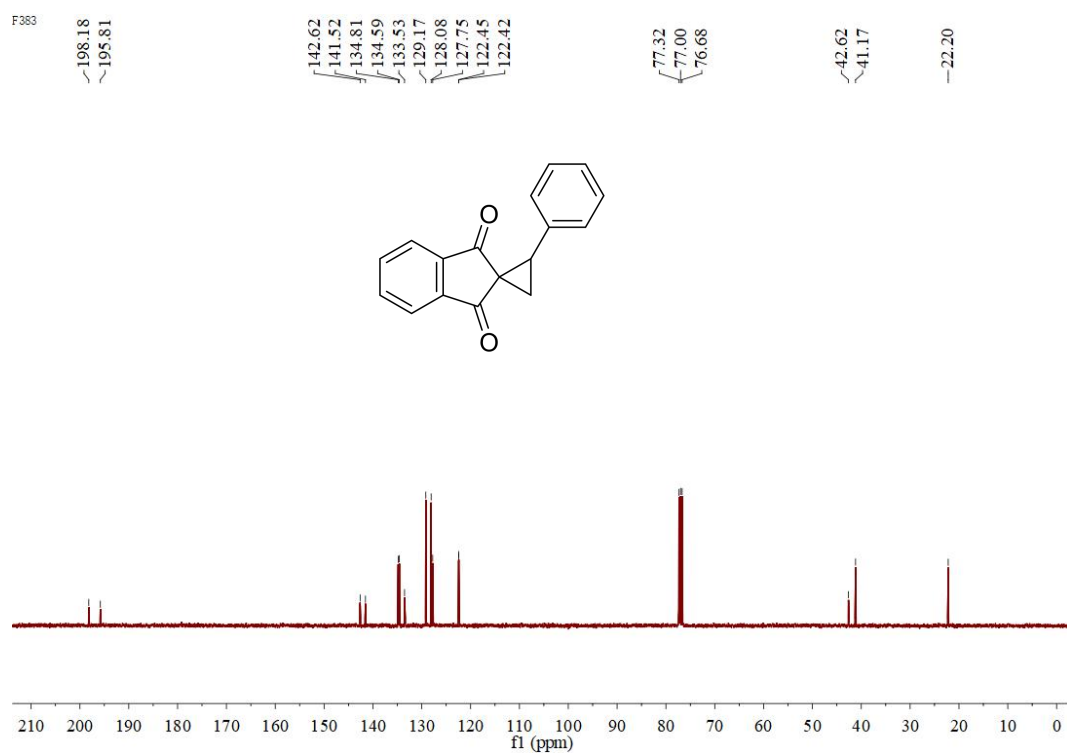

# <sup>1</sup>H NMR and <sup>13</sup>C NMR of 5b

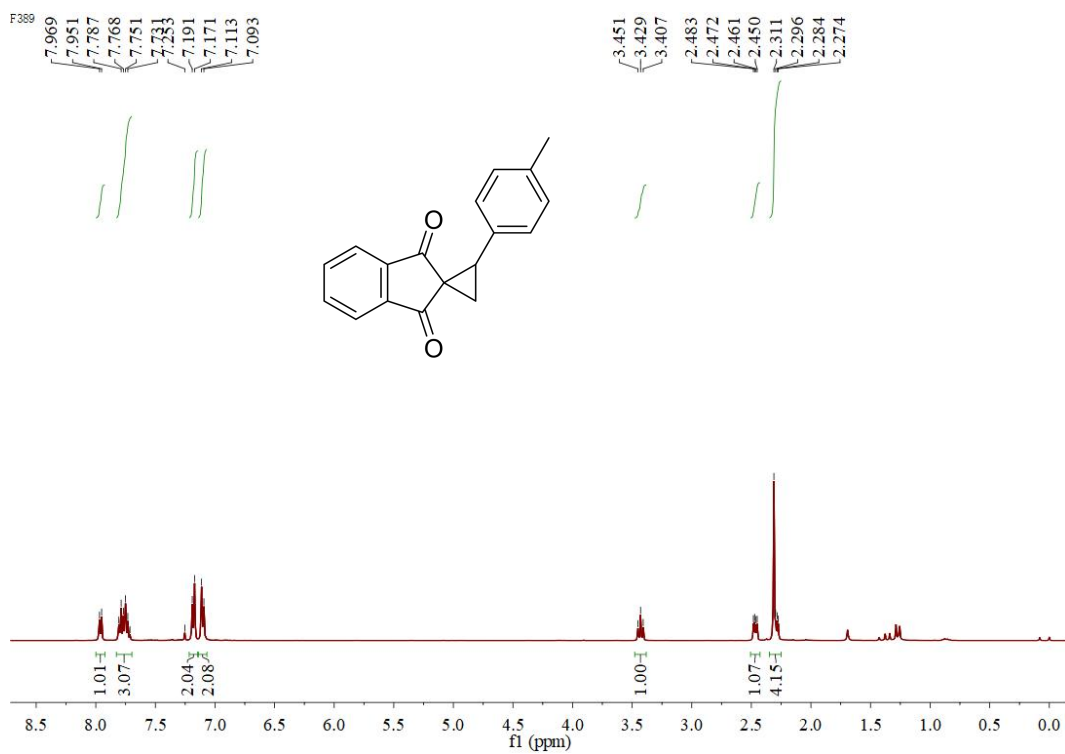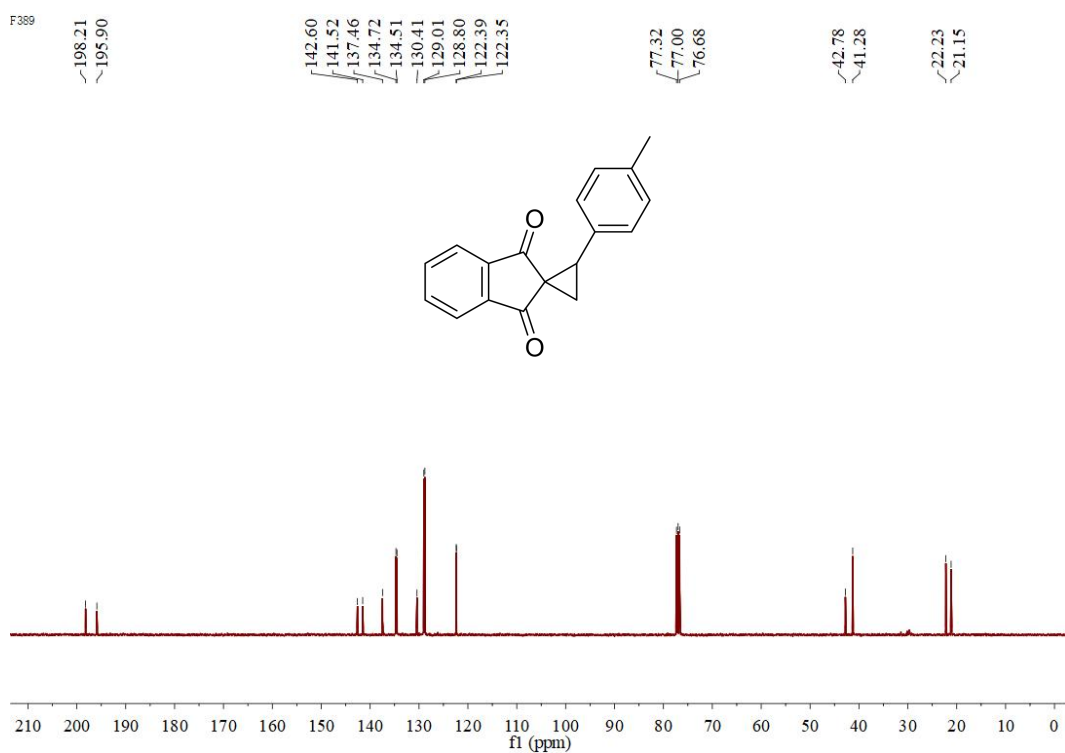

# <sup>1</sup>H NMR, <sup>13</sup>C NMR and <sup>19</sup>F NMR of 5c

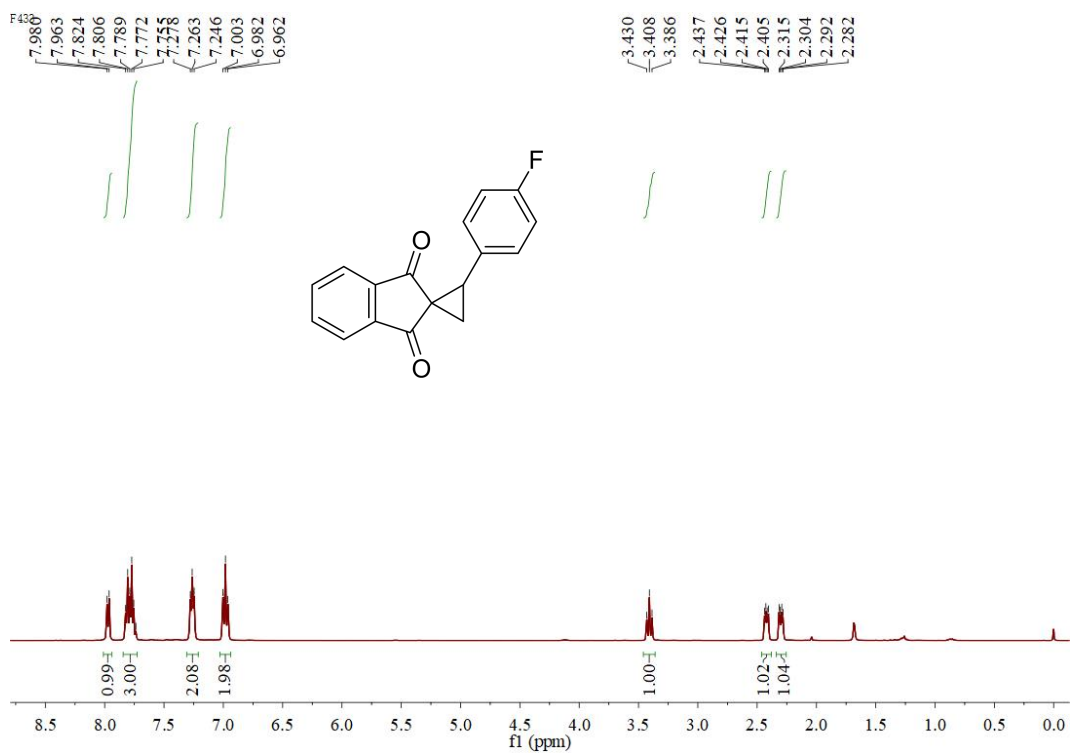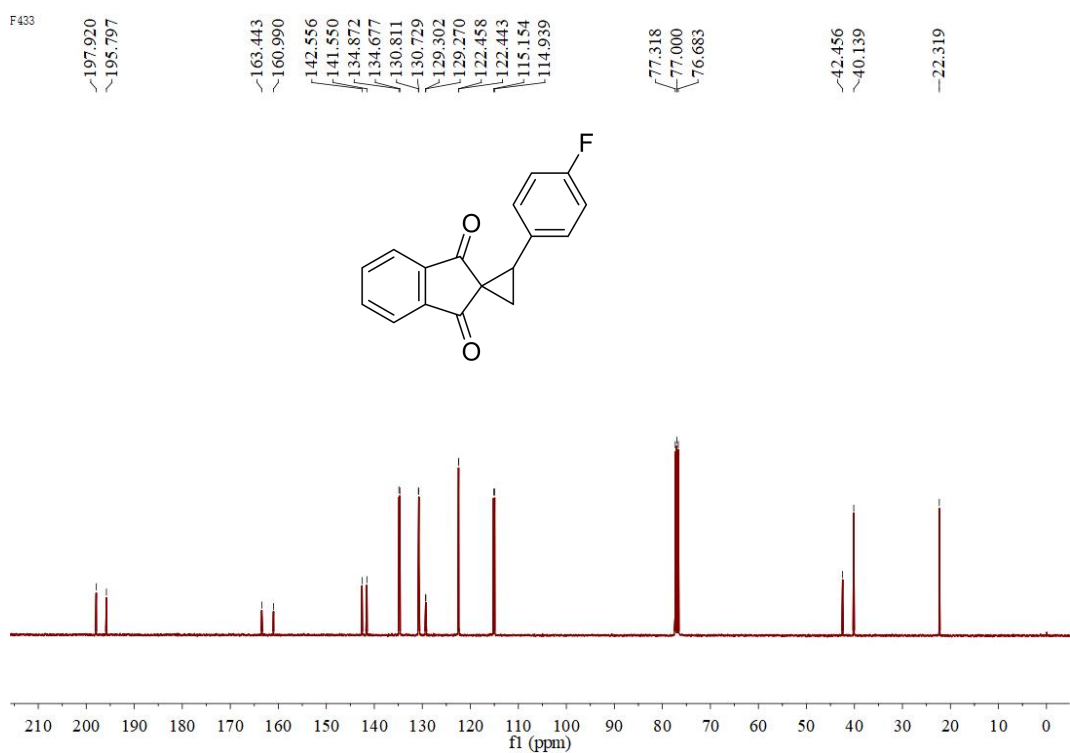



F433

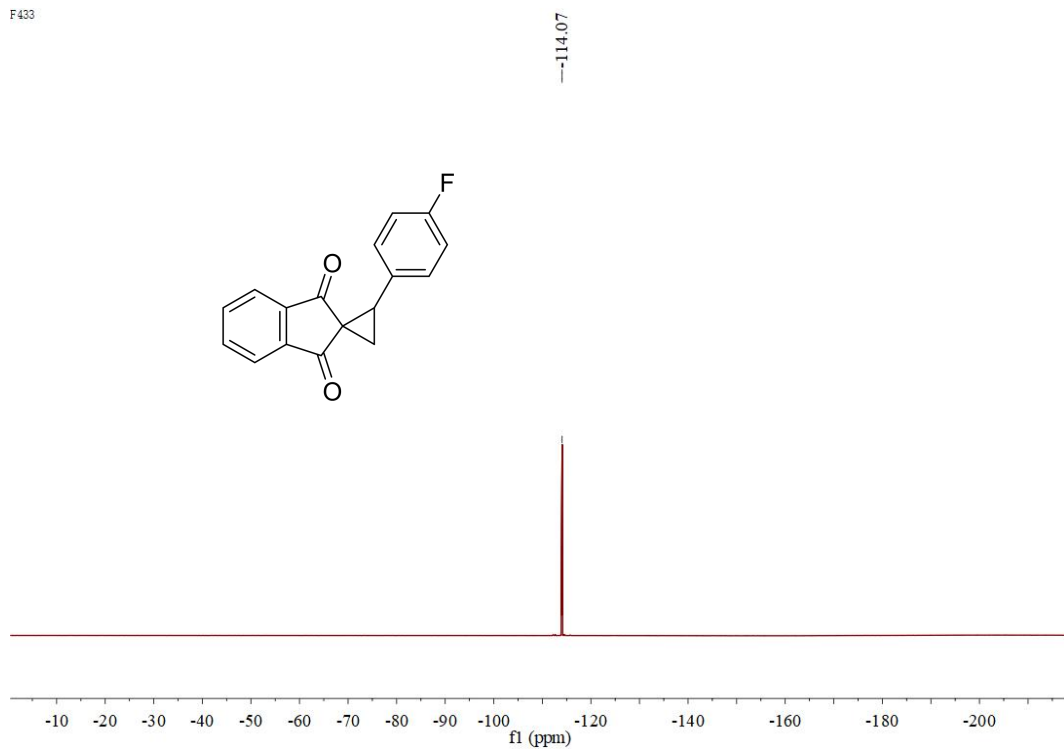

# <sup>1</sup>H NMR and <sup>13</sup>C NMR of 5d

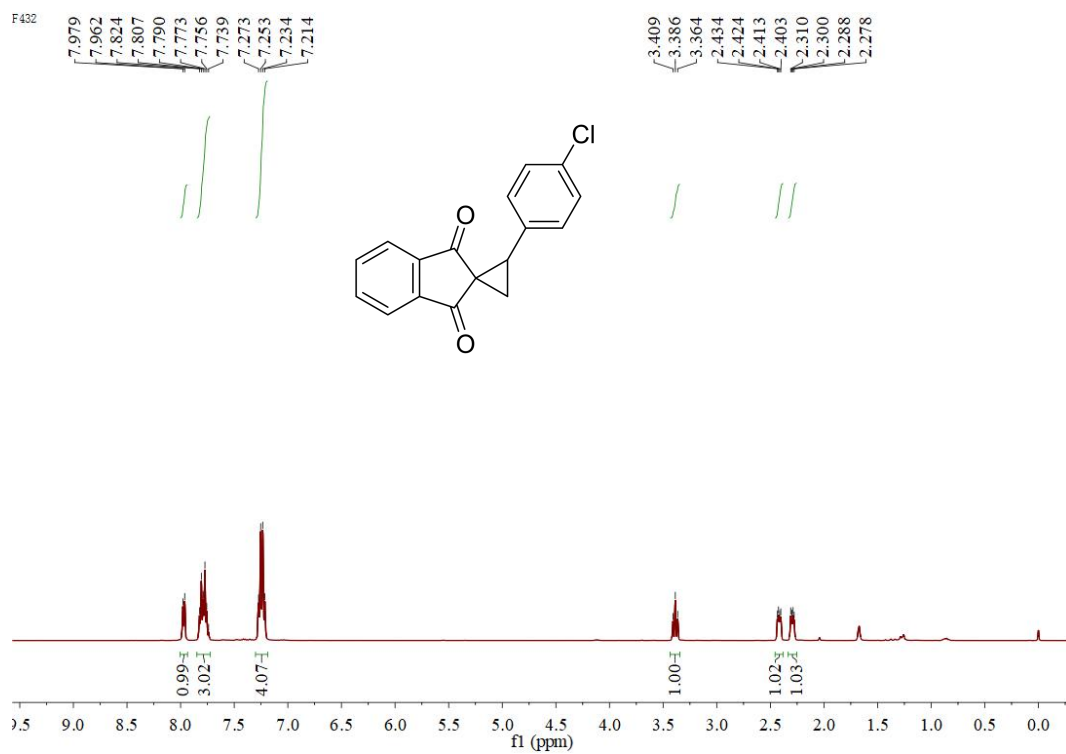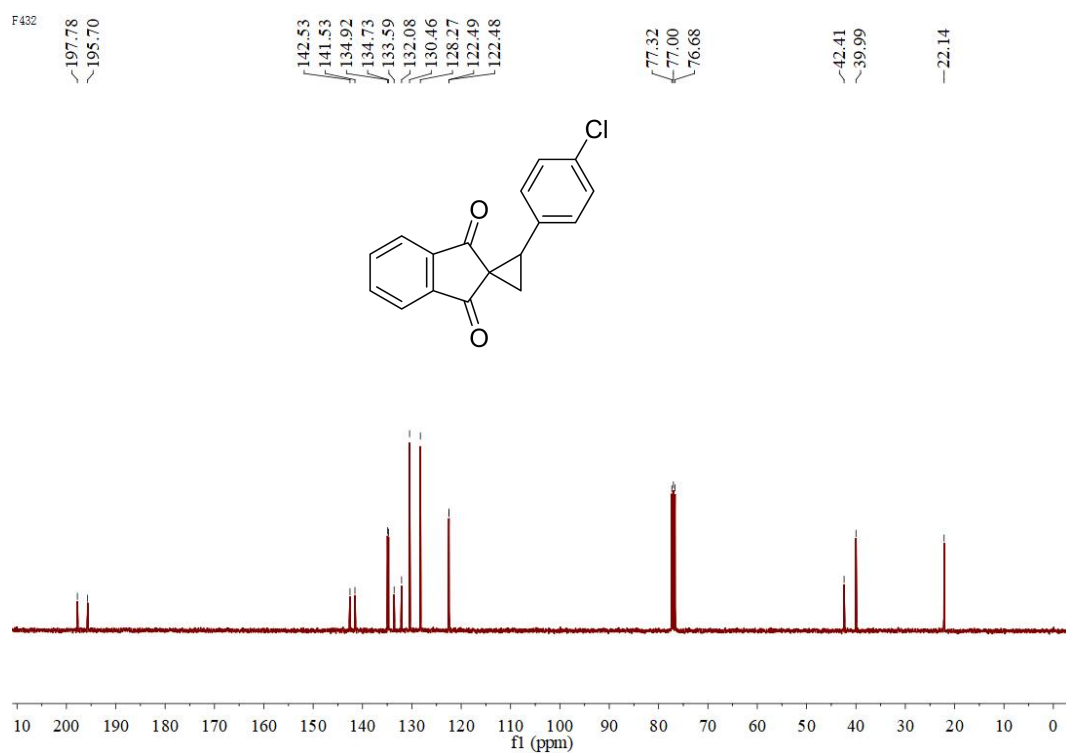

# <sup>1</sup>H NMR and <sup>13</sup>C NMR of 5e

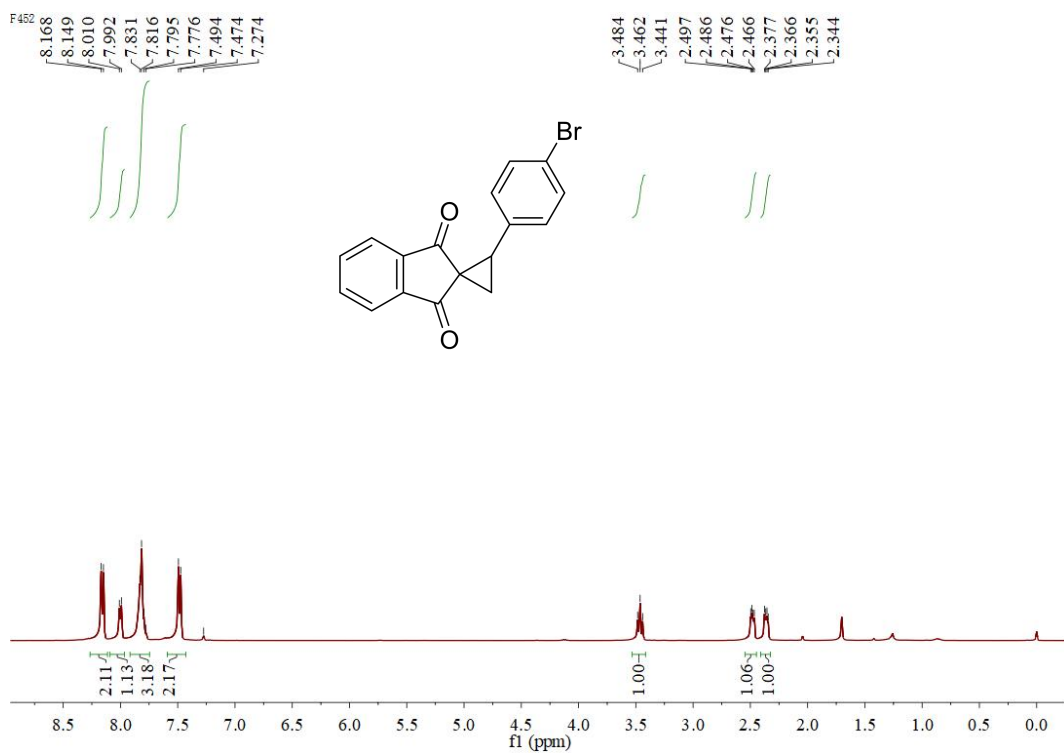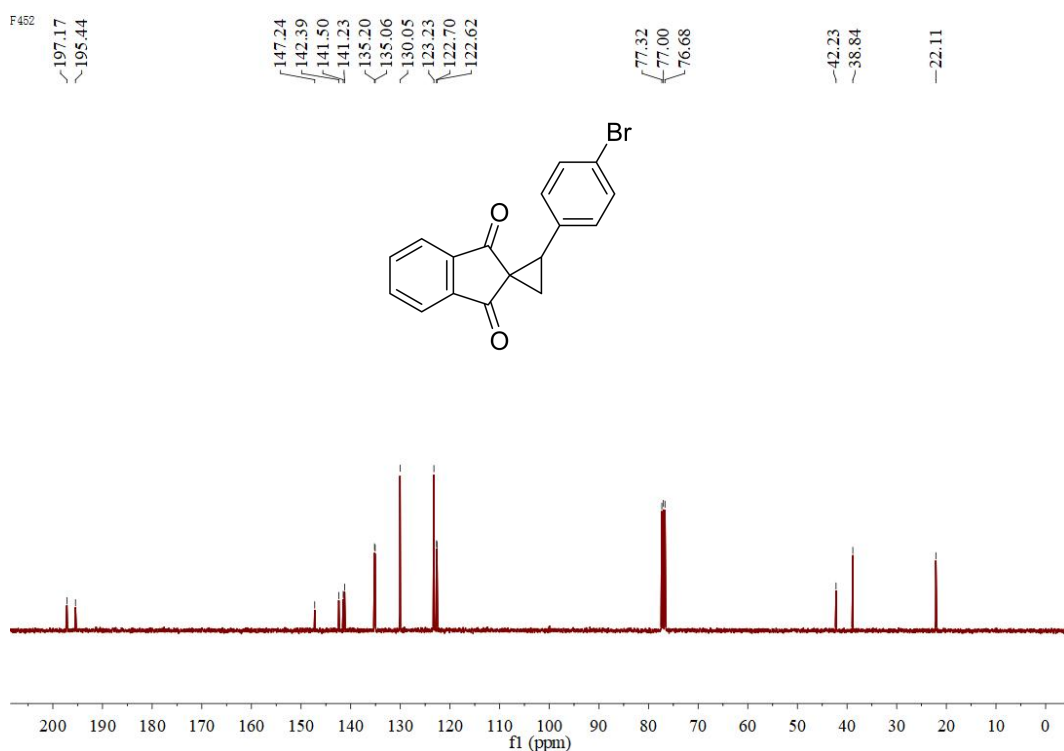

# <sup>1</sup>H NMR and <sup>13</sup>C NMR of 5f

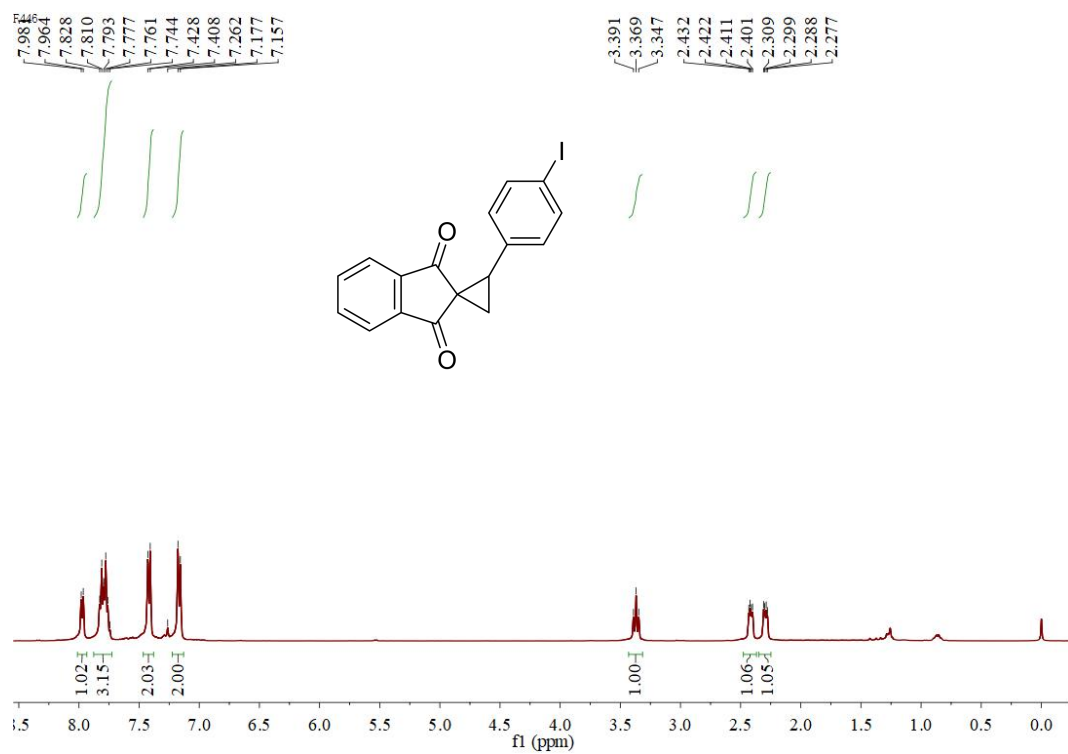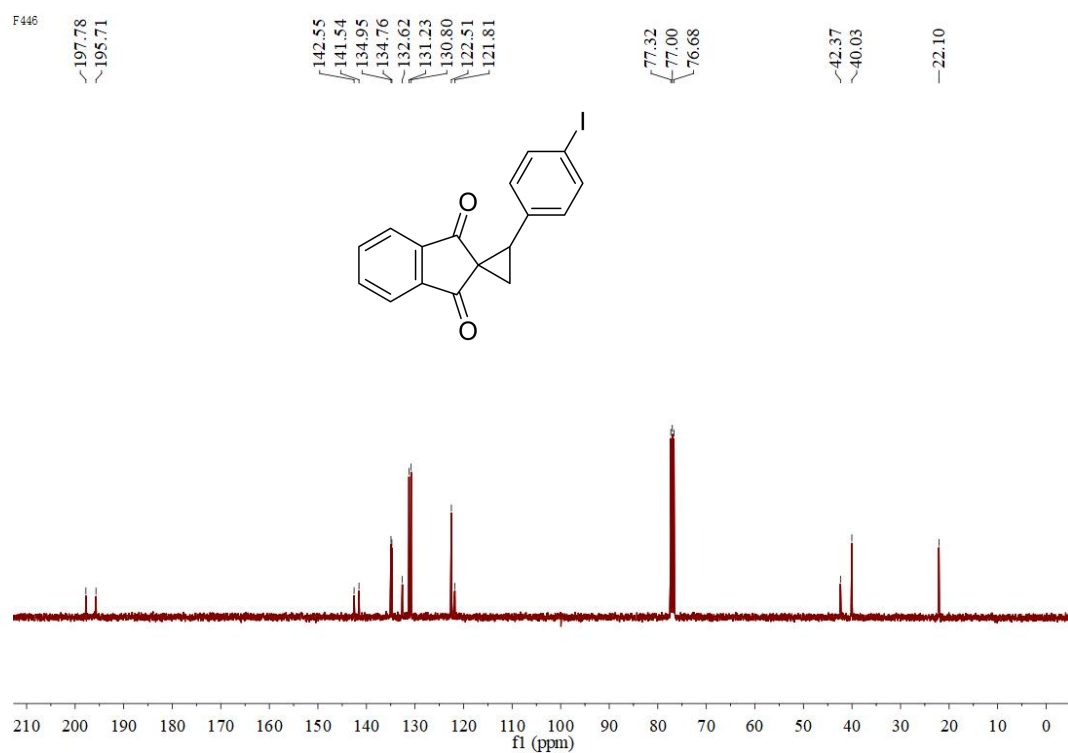

# <sup>1</sup>H NMR and <sup>13</sup>C NMR of 5g

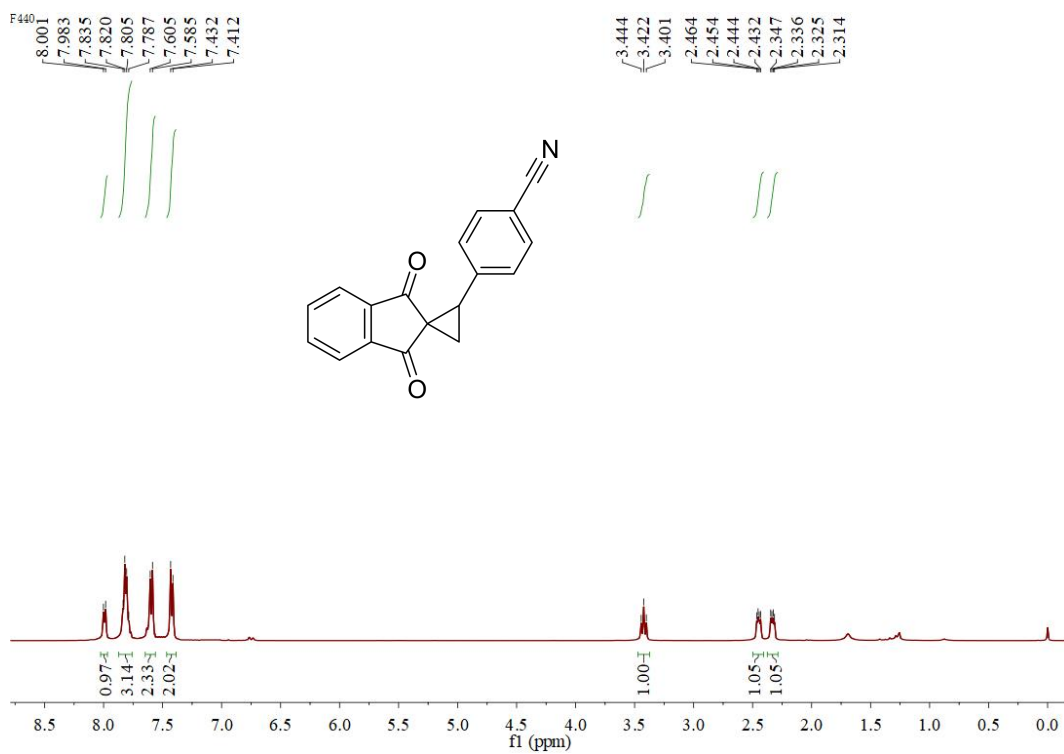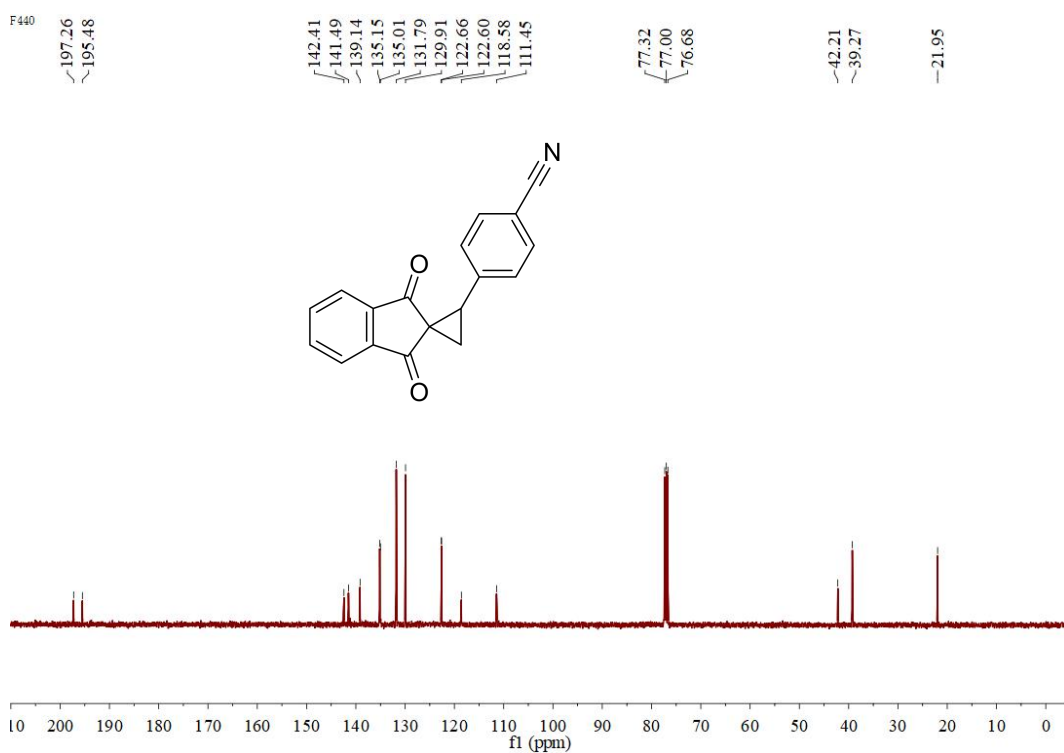

# <sup>1</sup>H NMR, <sup>13</sup>C NMR and <sup>19</sup>F NMR of 5h

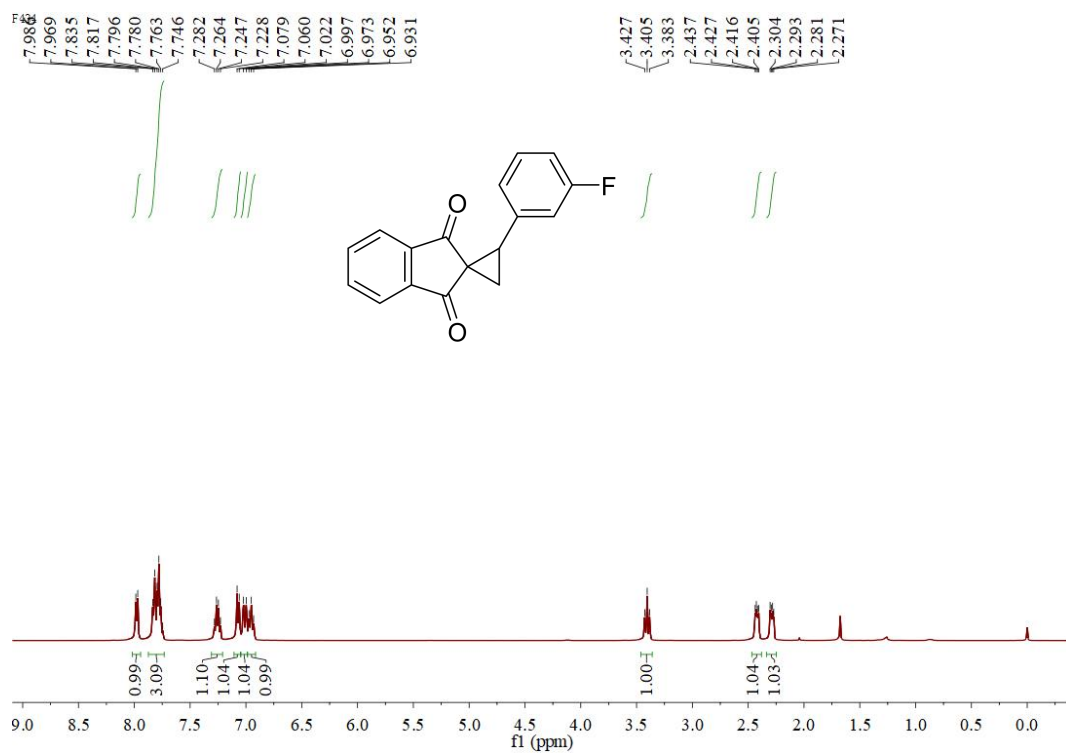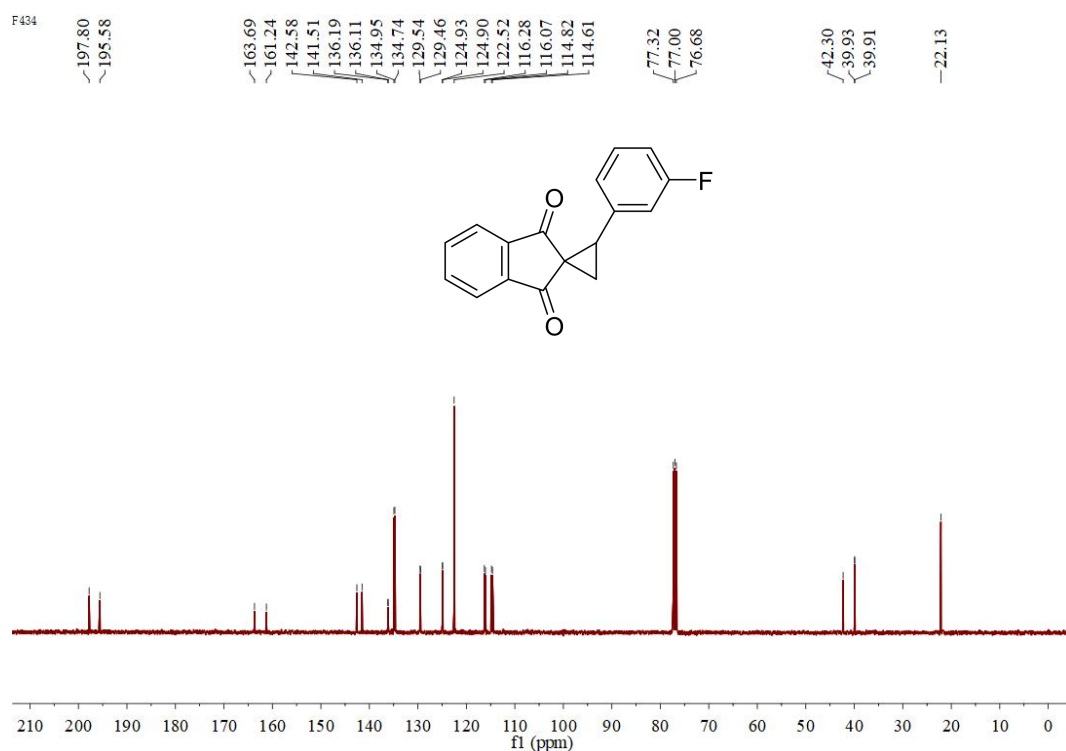

F434

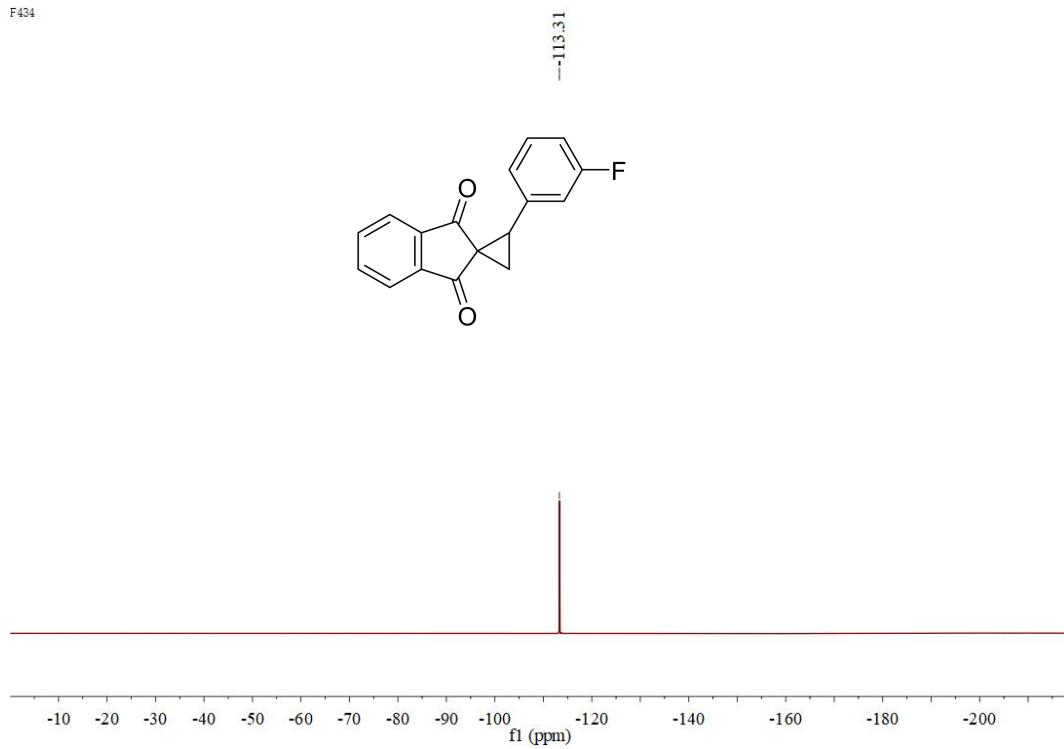

# <sup>1</sup>H NMR and <sup>13</sup>C NMR of 5i

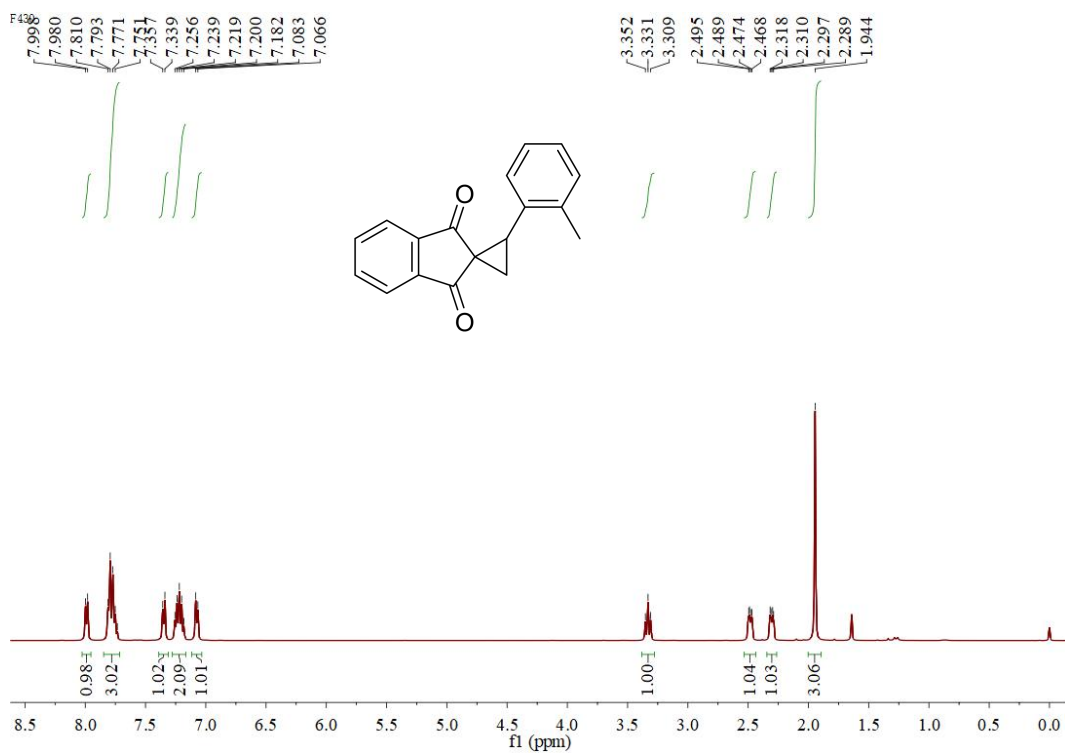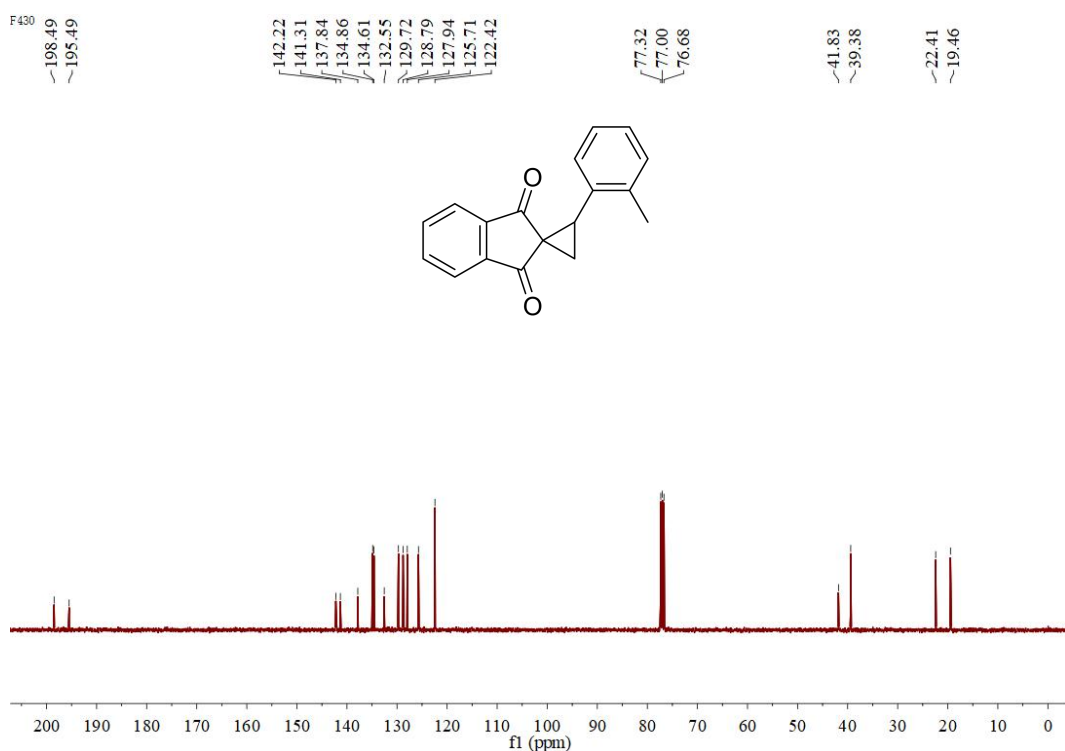



# <sup>1</sup>H NMR, <sup>13</sup>C NMR and <sup>19</sup>F NMR of 5j

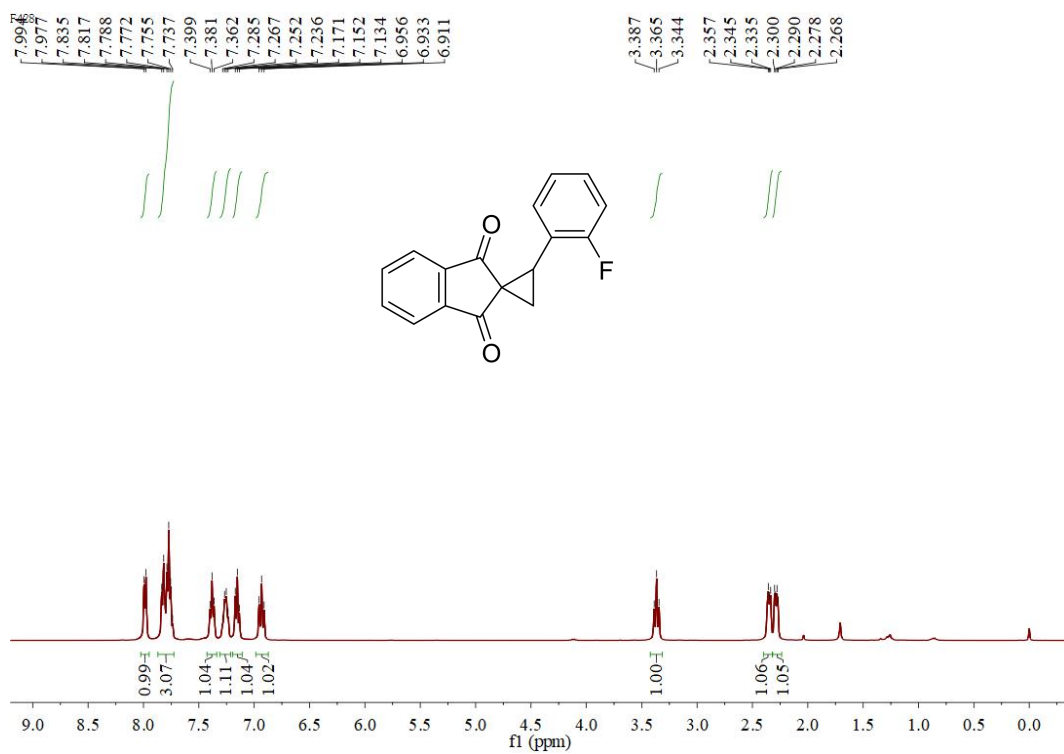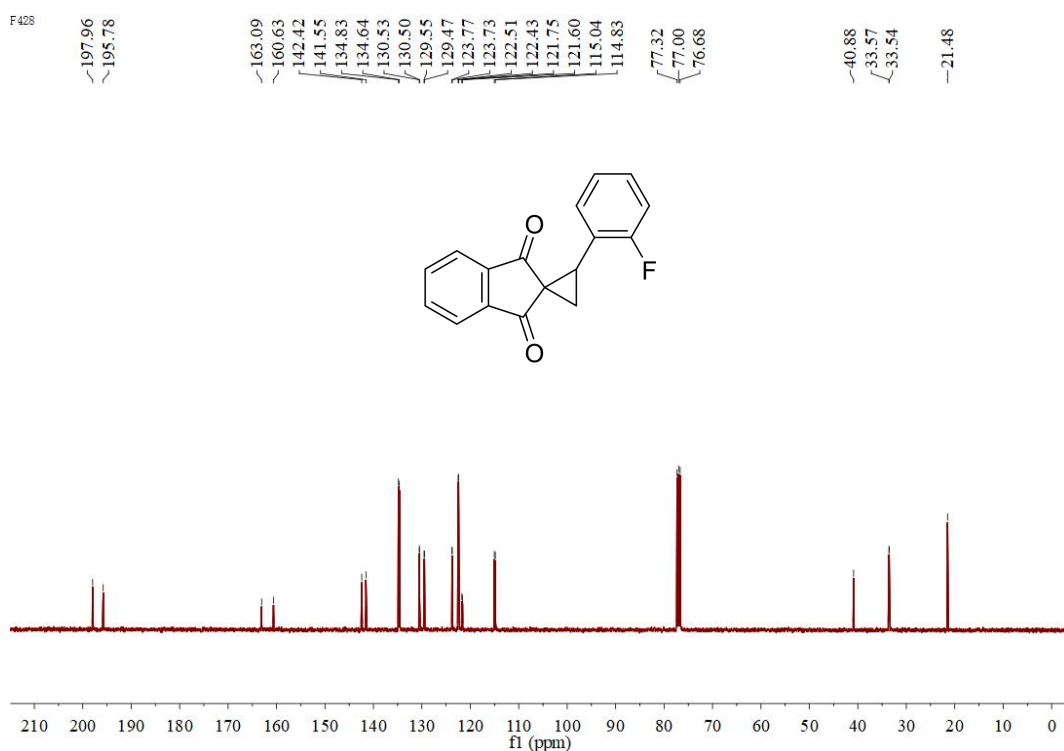

F428

--115.72

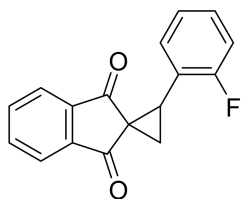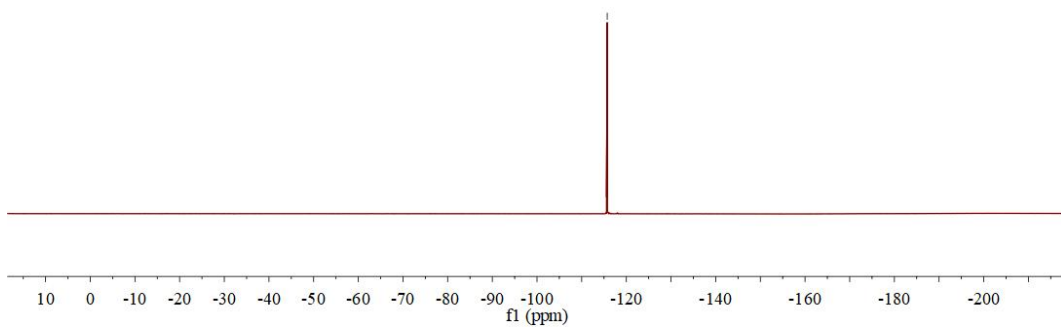

# <sup>1</sup>H NMR and <sup>13</sup>C NMR of 5k

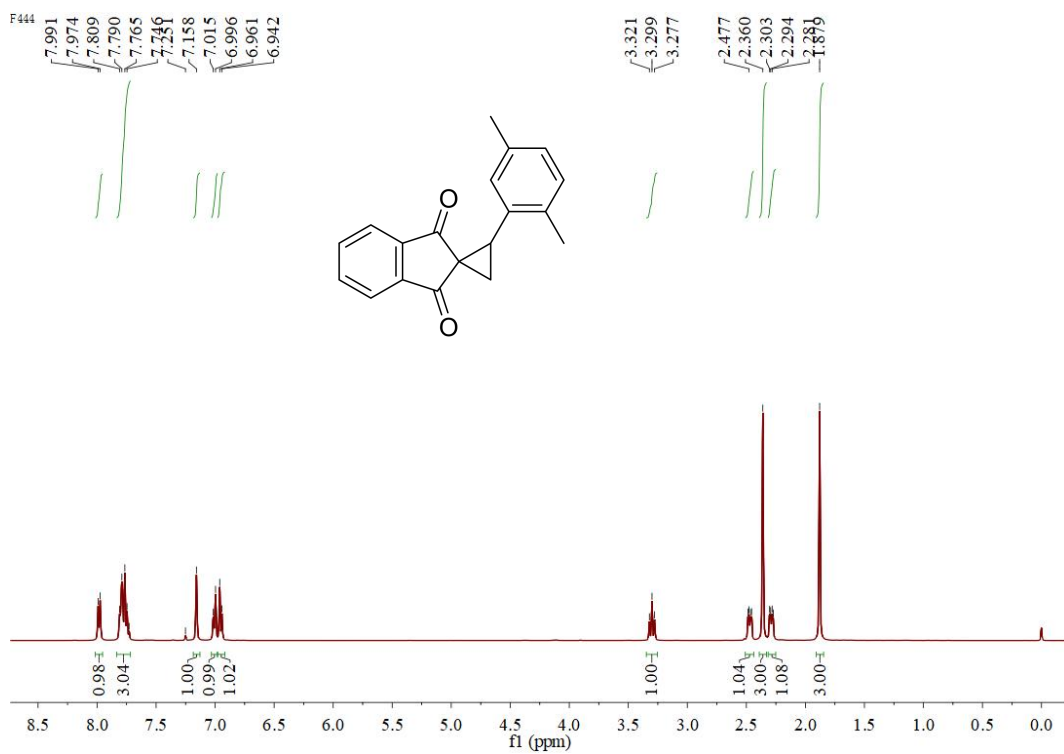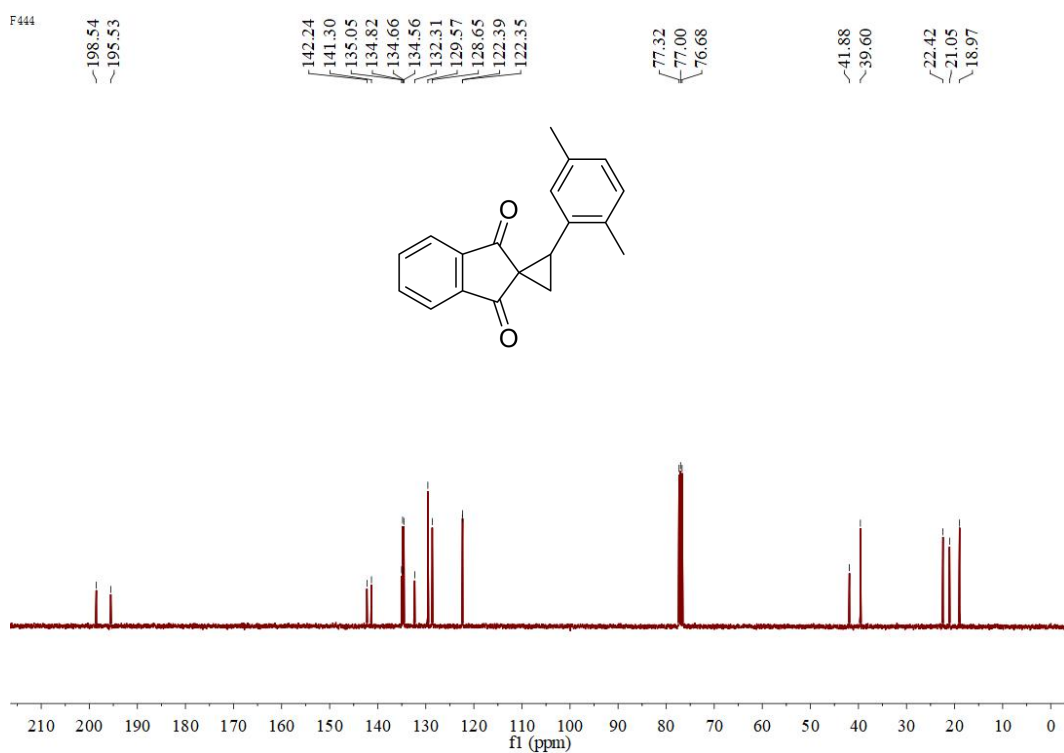

# <sup>1</sup>H NMR and <sup>13</sup>C NMR of 5l

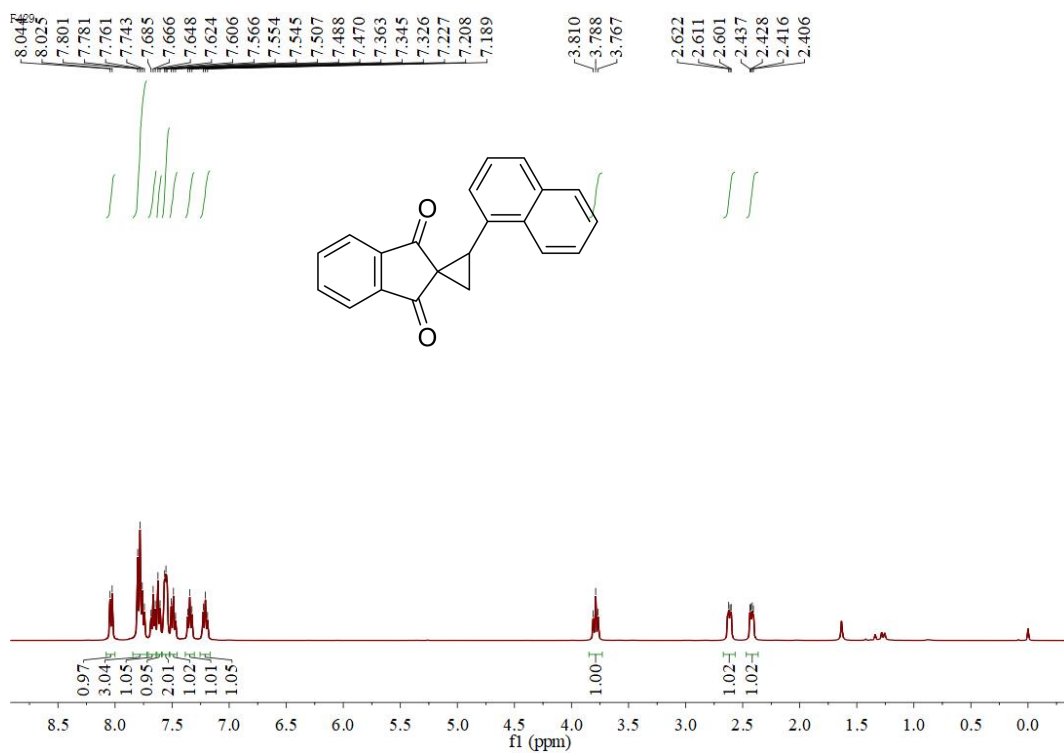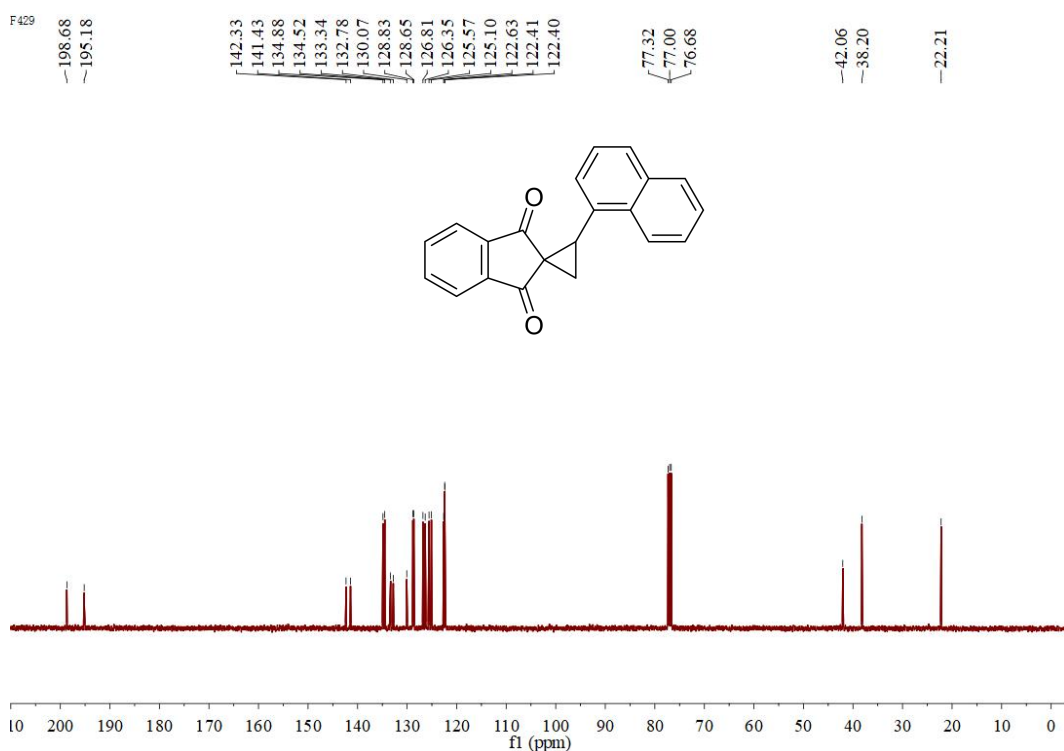

# <sup>1</sup>H NMR and <sup>13</sup>C NMR of 5m

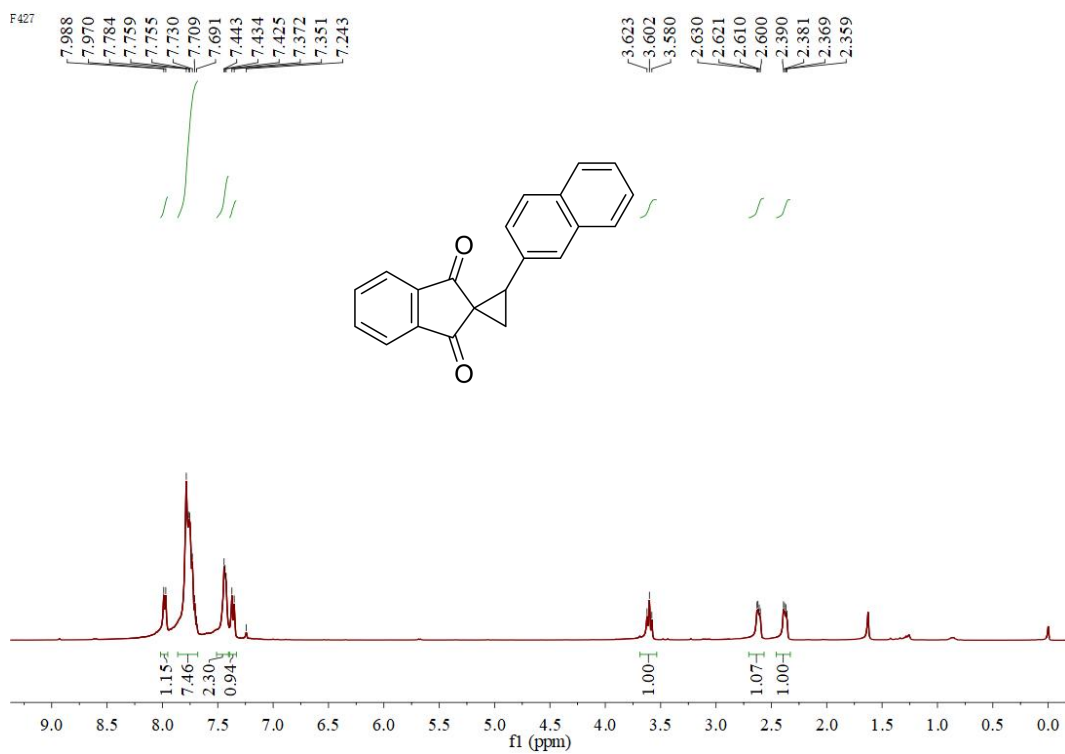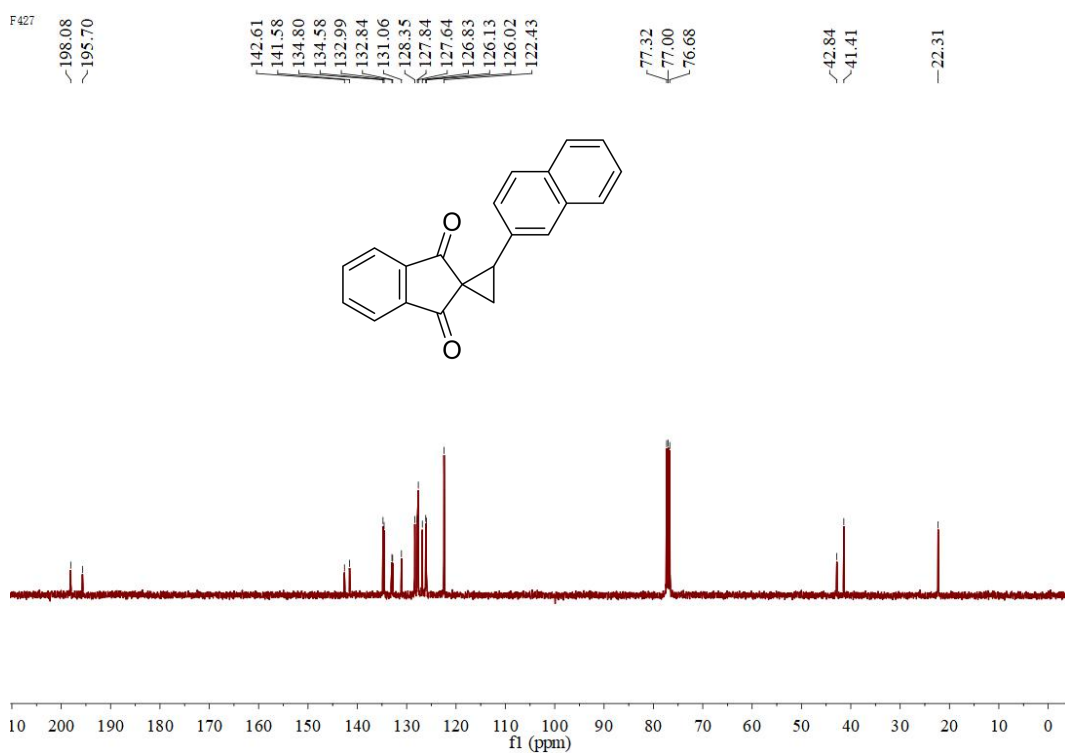

Supplement: d4cc01964d1.pdf [file d4cc01964d1.pdf]
